# Supplementary material for: Tobacco smoking and risk of endometriosis: a systematic review and meta-analysis
Source: PubMed Central journal article supplement — BMJ Open. 2014 Dec 22;4(12):e006325. doi: 10.1136/bmjopen-2014-006325 (PMC4275697; doi:10.1136/bmjopen-2014-006325), 2014-12-22
Supplement: bmjopen-2014-006325.draft_revisions.pdf [file bmjopen-2014-006325.draft_revisions.pdf]

# BMJ Open

## Tobacco smoking and risk of endometriosis: a systematic review and meta-analysis

|                                 |                                                                                                                                                                                                                                                                                                                                                                                                                                                                                                                                                                                                                                                                        |
|---------------------------------|------------------------------------------------------------------------------------------------------------------------------------------------------------------------------------------------------------------------------------------------------------------------------------------------------------------------------------------------------------------------------------------------------------------------------------------------------------------------------------------------------------------------------------------------------------------------------------------------------------------------------------------------------------------------|
| Journal:                        | <i>BMJ Open</i>                                                                                                                                                                                                                                                                                                                                                                                                                                                                                                                                                                                                                                                        |
| Manuscript ID:                  | bmjopen-2014-006325                                                                                                                                                                                                                                                                                                                                                                                                                                                                                                                                                                                                                                                    |
| Article Type:                   | Research                                                                                                                                                                                                                                                                                                                                                                                                                                                                                                                                                                                                                                                               |
| Date Submitted by the Author:   | 07-Aug-2014                                                                                                                                                                                                                                                                                                                                                                                                                                                                                                                                                                                                                                                            |
| Complete List of Authors:       | Bravi, Francesca; University of Milano, Dept. Clinical Sciences<br>Parazzini, Fabio; Fondazione Ca' Granda, Ospedale Maggiore Policlinico, Dept. Obstetrics, Gynecology and Neonatology<br>Cipriani, Sonia; University of Milano, Dept. Clinical Sciences<br>Chiapparino, Francesca; Fondazione Ca' Granda, Ospedale Maggiore Policlinico, Dept. Obstetrics, Gynecology and Neonatology<br>Ricci, Elena; Fondazione Ca' Granda, Ospedale Maggiore Policlinico, Dept. Obstetrics, Gynecology and Neonatology<br>Chiantera, Vito; Dept. Gynecology<br>Viganò, Paola; San Raffaele Scientific Institute, La Vecchia, Carlo; University of Milano, Dept. Clinical Sciences |
| <b>Primary Subject Heading</b>: | Obstetrics and gynaecology                                                                                                                                                                                                                                                                                                                                                                                                                                                                                                                                                                                                                                             |
| Secondary Subject Heading:      | Epidemiology, Obstetrics and gynaecology, Respiratory medicine, Smoking and tobacco                                                                                                                                                                                                                                                                                                                                                                                                                                                                                                                                                                                    |
| Keywords:                       | GYNAECOLOGY, Reproductive medicine < GYNAECOLOGY, EPIDEMIOLOGY                                                                                                                                                                                                                                                                                                                                                                                                                                                                                                                                                                                                         |
|                                 |                                                                                                                                                                                                                                                                                                                                                                                                                                                                                                                                                                                                                                                                        |

SCHOLARONE™  
Manuscripts

only

**Tobacco smoking and risk of endometriosis: a systematic review and meta-analysis**

Francesca Bravi (1), Fabio Parazzini (1,2), Sonia Cipriani (1,2), Francesca Chiaffarino (2),  
Elena Ricci (2), Vito Chiantera (3), Paola Viganò (4), Carlo La Vecchia (1)

(1) Department of Clinical Sciences and Community Health, University of Milan, via  
Commenda, 12, 20122 Milan, Italy

(2) Department of Obstetrics, Gynecology and Neonatology, IRCSS Fondazione Ca'  
Granda, Ospedale Maggiore Policlinico, Via Francesco Sforza, 28, 20122 Milano, Italy

(3) Department of Gynecology, Charité Universitätsmedizin, Charitestraße 1, 10117 Berlin,  
Germany.

(4) Obstetrics and Gynecology Unit, San Raffaele Scientific Institute, Via Olgettina, 60,  
20132 Milan, Italy

**Short title:** Tobacco smoking and endometriosis.

**Keywords:** endometriosis; tobacco smoking; meta-analysis.

**Word count:** 2400 - excluding title page, abstract, references, figures and tables.

**Corresponding author:**

Fabio Parazzini

Dipartimento di Scienze Cliniche e di Comunità, Università di Milano, Fondazione IRCCS  
Ca' Granda Ospedale Maggiore Policlinico, Via Commenda 12, 20122 Milano, Italy. Tel.:  
+39 02 55032318; fax: +39 02 550320252.

E-mail address: Fabio.Parazzini@unimi.it

**Abbreviations:** CI: confidence interval, HR: hazard ratio, MOOSE: meta-analysis of  
observational studies in epidemiology, OR: odds ratio, RR: relative risk.

## ABSTRACT

**Objective:** Since conflicting results have been published on the role of tobacco smoking on the risk of endometriosis, we provide an up to date summary quantification of this potential association.

**Design:** We performed a PubMed/MEDLINE search of the relevant publications up to May 2012, considering studies on humans published in English. We searched the reference list of the identified papers to identify other relevant publications. Both case-control or cohort studies have been included reporting risk estimates on the association between tobacco smoking and endometriosis. Thirty-three out of the 1,534 screened papers met the inclusion criteria. The selected studies included a total of 8,225 women diagnosed with endometriosis.

**Setting:** Academic hospitals

**Main outcome measures:** Risk of endometriosis in tobacco smokers.

**Results:** We obtained the summary estimates of the relative risk (RR) using the random-effect model, and assessed the heterogeneity among studies using the  $\chi^2$  test and quantified it using the  $I^2$  statistic. As compared to never smokers, the summary RR were 0.97 (95% confidence interval, CI: 0.86-1.09) for ever smokers, 0.95 (95% CI: 0.81-1.11) for former smokers, 0.94 (95% CI: 0.83-1.06) for current smokers, 0.87 (95% CI: 0.70-1.07) for moderate smokers, and 0.93 (95% CI: 0.69-1.26) for heavy smokers.

**Conclusions:** The present meta-analysis provided no evidence for an association between tobacco smoking and the risk of endometriosis. The results were consistent considering

1  
2  
3  
4  
5 ever, former, current, moderate, and heavy smokers, and across type of endometriosis and  
6  
7 study design.  
8  
9  
10  
11  
12  
13  
14  
15  
16  
17  
18  
19  
20  
21  
22  
23  
24  
25  
26  
27  
28  
29  
30  
31  
32  
33  
34  
35  
36  
37  
38  
39  
40  
41  
42  
43  
44  
45  
46  
47  
48  
49  
50  
51  
52  
53  
54  
55  
56  
57  
58  
59  
60

For peer review only

### Strengths and limitations of the study

- Meta-analysis including 33 papers without any relevant asymmetry in the funnel plot.
- The Egger's test was not statistically significant.
- In some studies, choice of the cases as symptomatic without distinguishing factors related to endometriosis to those associated to pelvic pain or infertility.
- In some studies, choice of controls in whom disease was not laparoscopically ruled out.
- Tobacco smoking based on patients' self-reported information.

## INTRODUCTION

Endometriosis is an estrogen-dependent, chronic inflammatory gynecological condition characterized by the proliferation of functional endometrial tissue that develops outside the uterine cavity, which may cause pain and infertility<sup>1</sup>. However, despite its relatively high prevalence, which spans from 20% in asymptomatic women<sup>2</sup>, to 30% in women with infertility<sup>3</sup>, and 45% in women with pain symptoms<sup>4</sup>, risk factors for this condition remain largely unknown.

Among the risk factors investigated, some studies have examined the role of tobacco smoking. In a Portuguese study investigating clinical and lifestyle factors in infertile women, current smokers had a decreased risk of endometriosis as compared to non-smokers or former smokers<sup>5</sup>. In a case-control study from Turkey evaluating the interaction between tobacco smoking and glutathione-S-transferase gene polymorphism as a risk factor for endometriosis, an inverse association between smoking and endometriosis was observed<sup>6</sup>. In a case-control study carried out in the USA, infertile women with endometriosis and fertile controls were compared and a decreased risk of endometriosis was found, though limited to women who begun smoking at an early age and were heavy smokers<sup>7</sup>. Other studies did not find significant association<sup>3, 8-14</sup>.

The biological plausibility potentially linking smoking and endometriosis resides in its endocrine and inflammatory mechanisms. Smoke compounds disrupt steroidogenesis, leading to impairment of E2 synthesis<sup>15, 16</sup> and progesterone synthesis deficiency<sup>17-19</sup>.

Moreover, smoking has a strong effect on inflammatory mediators in both the pulmonary

1  
2  
3  
4  
5 and extra-pulmonary environments and can further trigger inflammation associated with the  
6  
7 disease resulting in pro-inflammatory gene overexpression<sup>20</sup>.  
8

9  
10 Thus, in order to investigate the possible relation between tobacco smoking and  
11  
12 endometriosis, and to provide an overall quantitative estimate of any such relation, we  
13  
14 combined in a meta-analysis all published data on the issue.  
15  
16

## 17 18 19 **MATERIALS AND METHODS**

### 20 21 *Search strategy*

22  
23 We performed a PubMed/MEDLINE search of papers published between 1966 and May  
24  
25 2012, using the terms “tobacco” or “smoking” or “cigarette” in combination with “risk  
26  
27 factor”, or “epidemiology”, and “endometriosis”, following the MOOSE (Meta-analysis of  
28  
29 Observational Studies in Epidemiology) guidelines<sup>21</sup>. We selected only studies on humans,  
30  
31 published as full-length papers in English. No effort was made to identify papers published  
32  
33 in other languages or unpublished studies. Moreover, we reviewed the reference lists of the  
34  
35 retrieved papers, to identify any other relevant publication. Studies were included in the  
36  
37 meta-analysis if: a) they were based on case-control or cohort studies, reporting original  
38  
39 data; b) they reported information on the association between tobacco smoking and  
40  
41 endometriosis, including estimates of the relative risk (RR) or the odds ratio (OR) or the  
42  
43 hazard ratio (HR), with the corresponding 95% confidence intervals (CI), or frequency  
44  
45 distribution to calculate them; c) diagnosis of endometriosis was histologically confirmed  
46  
47 and/or clinically based. When we found more than one publication based on the same study  
48  
49  
50  
51  
52  
53  
54  
55  
56  
57  
58  
59  
60

1  
2  
3  
4  
5 population and data, we included only the one with most detailed information, or published  
6  
7 most recently.  
8

### 9 10 ***Data extraction for the meta-analysis***

11 From each publication we extracted the following information: country of origin; study  
12  
13 design; number and characteristics of subjects (cases, controls or cohort size); age, if  
14  
15 available; categories of tobacco smoking, if available; measures of association (RR, or OR  
16  
17 or HR) of endometriosis and corresponding 95% CI for every category of tobacco smoking,  
18  
19 or frequency distribution to calculate them; confounding variables allowed for in the  
20  
21 statistical analysis, if any. When more than one regression model was provided, estimates  
22  
23 adjusted for the largest number of confounding variables were considered.  
24  
25  
26  
27

### 28 29 ***Statistical analysis***

30 For some studies, we pooled estimates of different categories of cases or controls using the  
31  
32 method by Hamling et al.<sup>22</sup>, thus taking into account their correlation. We obtained the  
33  
34 summary estimates of the RR using the random-effect model (i.e., as weighed averages on  
35  
36 the sum of the inverse of the variance of the log RR and the moment estimator of the  
37  
38 variance between studies)<sup>23</sup>. We assessed the heterogeneity among studies using the  $\chi^2$  test  
39  
40<sup>24</sup> and quantified it using the  $I^2$  statistic, which represents the percentage of the total  
41  
42 variation across studies that is attributable to heterogeneity rather than chance<sup>25</sup>. Results  
43  
44 were defined as heterogeneous for P values less than 0.10.  
45  
46  
47  
48

49 We computed summary estimates for ever tobacco smokers, former smokers, current  
50  
51 smokers, moderate current smokers, and heavy current smokers, as compared to never  
52  
53 smokers. Different cut-points for moderate and heavy smoking were chosen, depending on  
54  
55  
56  
57  
58  
59  
60



1  
2  
3  
4  
5 those shown in the papers. We also carried out a cumulative meta-analysis to determine  
6  
7 whether the association between tobacco smoking and endometriosis changed over time  
8  
9 and performed subgroup analyses according to type of controls (fertile, infertile, both/not  
10  
11 specified). Publication bias was evaluated using funnel plot<sup>26</sup> and was quantified by the  
12  
13 Egger's test<sup>27</sup>.  
14  
15

## 16 17 18 19 **RESULTS**

20  
21 Figure 1 shows the flow-chart of the selection of publications. From the literature search we  
22  
23 identified 1534 studies, 1448 of which were excluded because not relevant, and 40 because  
24  
25 did not satisfy the inclusion criteria. Moreover, 3 studies were not comparable with the  
26  
27 other ones, since reported estimates for lifetime smoking<sup>2</sup>, included former or light  
28  
29 smokers in the reference category<sup>1</sup>, or included women with stage I endometriosis in the  
30  
31 comparison group, and thus we excluded those studies from the meta-analysis.  
32  
33

34  
35 Furthermore, we excluded 14 studies based on the same data of other included publications  
36  
37<sup>28-42</sup>. Thus, in the present meta-analysis we combined data from 33 studies, including a total  
38  
39 of 8225 women with endometriosis (suppl. file, Table 1)<sup>3, 5-10, 12-14, 43-65</sup>.  
40  
41

42  
43 Table 1 shows the main characteristics of the studies included in the present meta-analysis.  
44  
45 Most publications were based on case-control studies, while six were cohort studies, in  
46  
47 which, however, the role of smoking was not evaluated prospectively<sup>13, 43, 45, 47, 50</sup>, except in  
48  
49 one case<sup>5</sup>. Of these, 14 studies were from Europe<sup>3, 5, 9, 10, 45, 47-49, 52, 54, 58, 60-62</sup>, 12 from the  
50  
51 USA<sup>7, 12-14, 43, 46, 50, 53, 56, 57, 59, 63</sup>, 2 from Canada<sup>8, 55</sup>, 4 from Asia<sup>6, 44, 51, 65</sup>, and 1 from  
52  
53  
54  
55  
56  
57  
58  
59  
60  
61  
62  
63  
64  
65  
66  
67  
68  
69  
70  
71  
72  
73  
74  
75  
76  
77  
78  
79  
80  
81  
82  
83  
84  
85  
86  
87  
88  
89  
90  
91  
92  
93  
94  
95  
96  
97  
98  
99  
100  
Australia<sup>6</sup>.

1  
2  
3  
4  
5 Twenty-one studies reported information on ever smokers<sup>5, 7-10, 13, 14, 43, 45, 47-49, 52, 53, 56, 59, 60,</sup>  
6  
7 <sup>62-65</sup>, 16 on former smokers<sup>5, 7-10, 13, 45, 47-49, 53, 56, 60, 62-64</sup>, and 28 on current smokers<sup>3, 5-10, 12,</sup>  
8  
9 <sup>13, 44-51, 53-58, 60-64</sup>. Among these, 8 reported more categories of current smokers, thus we  
10  
11 could calculate separate estimates for moderate and heavy current smokers. We used  
12  
13 different cut-points for various study populations, depending on those presented in the  
14  
15 papers: thus the cut-point between moderate and heavy smokers were defined as 20  
16  
17 cigarettes per day in five studies<sup>5, 8, 46, 62, 63</sup>, 15 cigarettes per day in two studies<sup>13, 50</sup> and 10  
18  
19 cigarettes per day in one study<sup>10</sup>.

20  
21  
22  
23 For some studies reporting separate estimates for different types of patients and/or controls,  
24  
25 we computed a pooled estimate. In particular, Coccia et al.<sup>45</sup> reported separate estimates  
26  
27 for monolateral and bilateral endometriosis, Heilier et al.<sup>49</sup> for endometriosis and deep  
28  
29 endometriotic nodules, Parazzini et al.<sup>60</sup> for deep endometriosis and pelvic and ovarian  
30  
31 endometriosis, Signorello et al.<sup>14</sup> for fertile and infertile controls, Tsuchiya et al.<sup>65</sup> for  
32  
33 stage I/II and stage III/IV endometriosis. Moreover, Calahz-Jorge et al.<sup>5</sup> reported separate  
34  
35 estimates for grade I/II and grade III/IV endometriosis, as well as for any type of  
36  
37 endometriosis, and the Gruppo Italiano per lo Studio dell'endometriosi<sup>10</sup>, including two  
38  
39 separate groups of cases and controls undergoing laparoscopy for pelvic pain or infertility,  
40  
41 showed both separate and pooled estimate; in both cases we included in the meta-analysis  
42  
43 the combined estimates.

44  
45  
46  
47  
48  
49 Figure 2 shows the study-specific and summary RRs of endometriosis for ever smokers  
50  
51 versus non smokers. The summary RR from 21 studies was 0.97 (95% CI: 0.86-1.09)( $\chi^2$   
52  
53 heterogeneity between studies =37.23, p=0.011). Figure 3 gives the study-specific and  
54  
55  
56  
57  
58  
59  
60

1  
2  
3  
4  
5 summary RR of current (A) and former (B) smokers versus never smokers. The summary  
6  
7 RR of current versus never smokers was 0.94 (95% CI: 0.83-1.06) from 28 studies ( $x^2$   
8  
9 heterogeneity =54.76,  $p=0.001$ ). The summary RR of former versus never smokers was  
10  
11 0.95 (95% CI: 0.81-1.11) from 16 studies, with heterogeneity ( $x^2=30.63$ ,  $p=0.010$ ). Figure  
12  
13 4 shows the RR of moderate (A) and heavy (B) current smokers versus non smokers,  
14  
15 respectively. The summary RR from 8 studies were 0.87 (95% CI: 0.70-1.07)( $x^2$   
16  
17 heterogeneity =12.58,  $p=0.083$ ), and 0.93 (95% CI: 0.69-1.26)( $x^2$  heterogeneity =17.21,  
18  
19  $p=0.016$ ), for moderate and heavy smokers, respectively.  
20  
21  
22

23  
24 Figure 5 shows the funnel plot for ever smokers versus non smokers. There was no  
25  
26 evidence of publication bias ( $p=0.924$ ).  
27

28  
29 When we restricted the analyses to 8 studies reporting risk estimates adjusted for  
30  
31 confounding variables, risk estimates were 0.90 (95% CI: 0.77-1.06) for ever smokers, 0.87  
32  
33 (95% CI: 0.75-1.01) for former smokers, 0.86 (95% CI: 0.71-1.06) for current smokers,  
34  
35 0.87 (95% CI: 0.65-1.15) for moderate current smokers, and 0.95 (95% CI: 0.66-1.37) for  
36  
37 heavy current smokers versus never smokers.  
38

39  
40 In subgroup analyses according to type of controls, estimates for ever versus non smokers  
41  
42 were 0.97 (95% CI: 0.81-1.17) for 7 studies including fertile women, 0.92 (95% CI: 0.75-  
43  
44 1.12) for 6 studies including infertile women, and 0.99 (95% CI: 0.83-1.19) for 12 studies  
45  
46 including both or not specified type of controls. Moreover, when we restricted the analyses  
47  
48 to studies with cases and controls laparoscopically or surgically confirmed, the risk  
49  
50 estimates were 0.98 (95% CI:0.87-1.09) for ever smokers, 0.94 (95% CI: 0.85-1.03) for  
51  
52  
53  
54  
55  
56  
57  
58  
59  
60

1  
2  
3  
4  
5 former smokers, 0.91 (95 % CI: 0.77-1.07) for current smokers, 0.86 (95% CI: 0.66-1.12)  
6  
7 for moderate smokers, and 0.97 (95% CI: 0.70-1.35) for heavy smokers.  
8

9  
10 Figure 6 shows the cumulative meta-analysis of endometriosis risk for ever smokers versus  
11 non smokers over time, from 1986 to 2011. The estimate was 0.90 (95% CI: 0.70-1.15) in  
12  
13 1986 and 0.97 (95% CI: 0.86-1.09), with a few small variations over time, all the estimates  
14  
15 being not significantly below unity.  
16  
17  
18

## 19 20 21 **DISCUSSION**

22  
23 The present meta-analysis do not support an association between smoking and  
24 endometriosis risk. No association emerged considering subgroups of ever, former, current,  
25  
26 moderate and heavy smokers.  
27  
28

29  
30 This work may be affected by limitations and biases intrinsic in the observational studies  
31 included in the meta-analysis. A major concern is the choice of the comparison group.  
32  
33

34  
35 Some studies compared symptomatic cases with asymptomatic controls, and thus could not  
36 distinguish factors related to endometriosis to those associated to pelvic pain or infertility.  
37  
38

39  
40 Moreover, generally asymptomatic controls did not undergo laparoscopy nor other surgical  
41 procedures, and therefore the presence of asymptomatic endometriosis in these women  
42 cannot be ruled out. However, when we restricted the analyses to women in whom  
43  
44 laparoscopy or a surgical procedure had confirmed the presence or absence of  
45  
46 endometriotic lesions, still we did not find any significant association between smoking and  
47  
48 endometriosis of concern is the fact that in some studies diagnosis of endometriosis was  
49  
50 self reported. Further, tobacco smoking is based on patients' self-reported information, thus  
51  
52  
53  
54  
55  
56  
57  
58  
59  
60

1  
2  
3  
4  
5 some misclassification may have occurred. However, information on tobacco smoking in  
6  
7 observational studies has been shown to be satisfactorily reproducible and valid <sup>66-68</sup>.

8  
9  
10 Fourth, for most studies included in the present meta-analysis only raw estimates were  
11  
12 available, since tobacco smoking was not the main topic of the paper and it was only  
13  
14 reported as confounding variable. However, estimates from these studies were similar to  
15  
16 those from studies specifically investigating the role of smoking, thus, allowing to rule out  
17  
18 major publication bias on this issue. Moreover, we did not find any relevant asymmetry in  
19  
20 the funnel plot, and the Egger's test was not statistically significant. Thus, publication bias  
21  
22 is unlikely to have appreciably modified the relation between tobacco smoking and  
23  
24 endometriosis. Fifth, although previous studies have reported an association between  
25  
26 endometriosis and menstrual and reproductive factors, such as early menarche <sup>7, 12</sup>, longer  
27  
28 duration of bleeding <sup>7</sup>, intra-uterine device use <sup>69</sup>, or a lifelong regular menstrual pattern of  
29  
30 shorter cycles and heavy flows <sup>7, 12, 63, 70</sup>, nulliparity or low parity <sup>14, 28, 33, 71</sup>, only some  
31  
32 studies included in the present meta-analysis have accounted for the role of these factors in  
33  
34 the estimate of the relation between tobacco smoking and endometriosis. However,  
35  
36 analyses based on adjusted estimates only were comparable to those based on raw  
37  
38 estimates.  
39  
40  
41  
42  
43

44  
45 Since endometriosis is an estrogen-dependent condition, the inverse association between  
46  
47 smoking and endometriosis found in some studies has generally been attributed to the  
48  
49 antiestrogenic effect of tobacco <sup>72</sup>. Some authors have suggested that estradiol might  
50  
51 modulate the mediators of immune system molecules or those involved in tissue cell  
52  
53 adhesion and invasion <sup>73, 74</sup>. Moreover, a favorable effect of smoking has been observed in  
54  
55  
56  
57  
58  
59  
60

1  
2  
3  
4  
5 other benign and malignant estrogen-related diseases, such as endometrial cancer <sup>75</sup>, and  
6  
7 fibroids <sup>76</sup>. The antiestrogenic effect of smoking on these conditions could support a  
8  
9 protective effect of smoking on endometriosis. Indeed, earlier studies tended to support  
10  
11 some inverse association, which however declined over time, and accumulating evidence  
12  
13 suggests the presence of some false positive findings in earlier studies <sup>77</sup>. Furthermore,  
14  
15 tobacco smoking has been associated with female infertility <sup>78</sup>, and thus the interpretation  
16  
17 of the relation between smoking and endometriosis may be influenced by the role of  
18  
19 infertility.  
20  
21  
22

23  
24 Despite the high prevalence of this condition, the epidemiology of endometriosis still needs  
25  
26 to be elucidated, for several reasons. Endometriosis is a complex condition in which a  
27  
28 genetic contribution and environmental factors seem to be involved <sup>79</sup>. Further, it is a  
29  
30 disease characterized by a still poorly defined phenotype. The disease stage depends on the  
31  
32 type (cysts, implants, nodules), location (ovary, peritoneum, bladder, ureter, etc.),  
33  
34 appearance and depth of invasion of the lesions, that can vary greatly among patients. The  
35  
36 clinical presentation can be so variable and the lesions of such diverse morphology that  
37  
38 none of the pathogenetic models proposed (retrograde menstruation, coelomic metaplasia,  
39  
40 embryological origin) can fully explain the various aspects of endometriosis, and none has  
41  
42 been recognized as an ultimately valid explanatory model for all the different forms and  
43  
44 manifestations of the disease <sup>79</sup>. Moreover, an invasive procedure is needed to diagnose it  
45  
46 <sup>79, 80</sup>. Furthermore, published studies differ in the case and control selection and population  
47  
48 definition, depending on the choices to consider fertile or infertile cases, and healthy  
49  
50 controls or patients with conditions other than endometriosis. Despite these possible  
51  
52  
53  
54  
55  
56  
57  
58  
59  
60

1  
2  
3  
4  
5 sources of variations, the consistency of results observed weighs against any relevant role  
6  
7 of tobacco on endometriosis.

8  
9  
10 In conclusion, the present meta-analysis gives no support to the hypothesis of an  
11  
12 association between tobacco smoking and endometriosis. However further studies are  
13  
14 needed to evaluate in deep the time out relationship and the potential effect of smoking a  
15  
16 different type of endometriosis.  
17  
18  
19  
20  
21  
22  
23  
24  
25  
26  
27  
28  
29  
30  
31  
32  
33  
34  
35  
36  
37  
38  
39  
40  
41  
42  
43  
44  
45  
46  
47  
48  
49  
50  
51  
52  
53  
54  
55  
56  
57  
58  
59  
60

1  
2  
3  
4  
5  
6  
7 **Acknowledgments:** The authors thank Mrs I. Garimoldi for editorial assistance.  
8

9  
10 **Competing interests:** The authors declare no conflicts of interest  
11

### 12 **Contributors**

13  
14 F.P. conceived the idea and planned the research. FB and SC performed the statistical  
15 analysis. FB, FC, ER, VC retrieved data. FP, FB, PV and CLV wrote the entire draft of the  
16 article and all subsequent drafts after critical review by all co-authors. All co-author had  
17 significant input in the preparation of the article and the analysis. FP is the guarantor for the  
18 article.  
19  
20  
21  
22  
23

24 **Data Sharing Statement:** No additional data available  
25

### 26 **Details of ethics approval:**

27  
28  
29 No ethical approval was needed for this review.  
30  
31

32 **Funding:** none.  
33  
34  
35  
36  
37  
38  
39  
40  
41  
42  
43  
44  
45  
46  
47  
48  
49  
50  
51  
52  
53  
54  
55  
56  
57  
58  
59  
60



## REFERENCES

1. Donnez J, Van Langendonck A, Casanas-Roux F, et al. Current thinking on the pathogenesis of endometriosis. *Gynecol Obstet Invest* 2002;54 Suppl 1:52-8; discussion 9-62.
2. Moen MH, Muus KM. Endometriosis in pregnant and non-pregnant women at tubal sterilization. *Hum Reprod* 1991;6:699-702.
3. Matorras R, Rodriquez F, Pijoan JI, et al. Epidemiology of endometriosis in infertile women. *Fertil Steril* 1995;63:34-8.
4. Gruppo italiano per lo studio dell'endometriosi. Prevalence and anatomical distribution of endometriosis in women with selected gynaecological conditions: results from a multicentric Italian study. *Hum Reprod* 1994;9:1158-62.
5. Calhaz-Jorge C, Mol BW, Nunes J, et al. Clinical predictive factors for endometriosis in a Portuguese infertile population. *Hum Reprod* 2004;19:2126-31.
6. Aban M, Ertunc D, Tok EC, et al. Modulating interaction of glutathione-S-transferase polymorphisms with smoking in endometriosis. *J Reprod Med* 2007;52:715-21.
7. Cramer DW, Wilson E, Stillman RJ, et al. The relation of endometriosis to menstrual characteristics, smoking, and exercise. *JAMA* 1986;255:1904-8.
8. Berube S, Marcoux S, Maheux R. Characteristics related to the prevalence of minimal or mild endometriosis in infertile women. Canadian Collaborative Group on Endometriosis. *Epidemiology* 1998;9:504-10.
9. Chapron C, Souza C, de Ziegler D, et al. Smoking habits of 411 women with histologically proven endometriosis and 567 unaffected women. *Fertil Steril* 2010;94:2353-5.
10. Gruppo Italiano per lo Studio dell'endometriosi. Risk factors for pelvic endometriosis in women with pelvic pain or infertility. Gruppo Italiano per lo Studio dell' endometriosi. *Eur J Obstet Gynecol Reprod Biol* 1999;83:195-9.
11. Hemmings R, Rivard M, Olive DL, et al. Evaluation of risk factors associated with endometriosis. *Fertil Steril* 2004;81:1513-21.

12. Matalliotakis IM, Cakmak H, Fragouli YG, et al. Epidemiological characteristics in women with and without endometriosis in the Yale series. *Arch Gynecol Obstet* 2008;277:389-93.
13. Missmer SA, Hankinson SE, Spiegelman D, et al. Incidence of laparoscopically confirmed endometriosis by demographic, anthropometric, and lifestyle factors. *Am J Epidemiol* 2004;160:784-96.
14. Signorello LB, Harlow BL, Cramer DW, et al. Epidemiologic determinants of endometriosis: a hospital-based case-control study. *Ann Epidemiol* 1997;7:267-741.
15. Sanders SR, Cuneo SP, Turzillo AM. Effects of nicotine and cotinine on bovine theca interna and granulosa cells. *Reprod Toxicol* 2002;16:795-800.
16. Vidal JD, VandeVoort CA, Marcus CB, et al. In vitro exposure to environmental tobacco smoke induces CYP1B1 expression in human luteinized granulosa cells. *Reprod Toxicol* 2006;22:731-7.
17. Miceli F, Minici F, Tropea A, et al. Effects of nicotine on human luteal cells in vitro: a possible role on reproductive outcome for smoking women. *Biol Reprod* 2005;72:628-32.
18. Paksy K, Rajczy K, Forgacs Z, et al. Effect of cadmium on morphology and steroidogenesis of cultured human ovarian granulosa cells. *J Appl Toxicol* 1997;17:321-7.
19. Piasek M, Laskey JW. Acute cadmium exposure and ovarian steroidogenesis in cycling and pregnant rats. *Reprod Toxicol* 1994;8:495-507.
20. Goncalves RB, Coletta RD, Silverio KG, et al. Impact of smoking on inflammation: overview of molecular mechanisms. *Inflamm Res* 2011;60:409-24.
21. Stroup DF, Berlin JA, Morton SC, et al. Meta-analysis of observational studies in epidemiology: a proposal for reporting. Meta-analysis Of Observational Studies in Epidemiology (MOOSE) group. *JAMA* 2000;283:2008-12.
22. Hamling J, Lee P, Weitkunat R, et al. Facilitating meta-analyses by deriving relative effect and precision estimates for alternative comparisons from a set of estimates presented by exposure level or disease category. *Stat Med* 2008;27:954-70.

- 1  
2  
3  
4  
5 23. DerSimonian R, Laird N. Meta-analysis in clinical trials. *Control Clin Trials*  
6 1986;7:177-88.
- 7  
8  
9 24. Greenland S. Quantitative methods in the review of epidemiologic literature.  
10 *Epidemiol Rev* 1987;9:1-30.
- 11  
12  
13 25. Higgins JP, Thompson SG. Quantifying heterogeneity in a meta-analysis. *Stat Med*  
14 2002;21:1539-58.
- 15  
16  
17 26. Thornton A, Lee P. Publication bias in meta-analysis: its causes and consequences.  
18 *J Clin Epidemiol* 2000;53:207-16.
- 19  
20  
21 27. Egger M, Davey Smith G, Schneider M, et al. Bias in meta-analysis detected by a  
22 simple, graphical test. *BMJ* 1997;315:629-34.
- 23  
24  
25 28. Darrow SL, Vena JE, Batt RE, et al. Menstrual cycle characteristics and the risk of  
26 endometriosis. *Epidemiology* 1993;4:135-42.
- 27  
28  
29 29. Beral V, Rolfs R, Joesoef MR, et al. Primary infertility: characteristics of women in  
30 North America according to pathological findings. *J Epidemiol Community Health*  
31 1994;48:576-9.
- 32  
33  
34 30. Cooney MA, Buck Louis GM, Hediger ML, et al. Organochlorine pesticides and  
35 endometriosis. *Reprod Toxicol* 2010;30:365-9.
- 36  
37  
38 31. Ferrero S, Pretta S, Bertoldi S, et al. Increased frequency of migraine among women  
39 with endometriosis. *Hum Reprod* 2004;19:2927-32.
- 40  
41  
42 32. Gagne D, Rivard M, Page M, et al. Blood leukocyte subsets are modulated in  
43 patients with endometriosis. *Fertil Steril* 2003;80:43-53.
- 44  
45  
46 33. Grodstein F, Goldman MB, Cramer DW. Infertility in women and moderate alcohol  
47 use. *Am J Public Health* 1994;84:1429-32.
- 48  
49  
50 34. Grodstein F, Goldman MB, Ryan L, et al. Relation of female infertility to  
51 consumption of caffeinated beverages. *Am J Epidemiol* 1993;137:1353-60.
- 52  
53  
54 35. Heilier JF, Verougstraete V, Nackers F, et al. Assessment of cadmium impregnation  
55 in women suffering from endometriosis: a preliminary study. *Toxicol Lett*  
56 2004;154:89-93.
- 57  
58  
59 36. Louis GM, Weiner JM, Whitcomb BW, et al. Environmental PCB exposure and risk  
60 of endometriosis. *Hum Reprod* 2005;20:279-85.

- 1  
2  
3  
4  
5 37. Marino JL, Holt VL, Chen C, et al. Shift work, hCLOCK T3111C polymorphism,  
6 and endometriosis risk. *Epidemiology* 2008;19:477-84.  
7  
8  
9 38. Nagle CM, Bell TA, Purdie DM, et al. Relative weight at ages 10 and 16 years and  
10 risk of endometriosis: a case-control analysis. *Hum Reprod* 2009;24:1501-6.  
11  
12 39. Phipps WR, Cramer DW, Schiff I, et al. The association between smoking and  
13 female infertility as influenced by cause of the infertility. *Fertil Steril* 1987;48:377-  
14 82.  
15  
16  
17 40. Trabert B, De Roos AJ, Schwartz SM, et al. Non-dioxin-like polychlorinated  
18 biphenyls and risk of endometriosis. *Environ Health Perspect* 2010;118:1280-5.  
19  
20 41. Tsuchiya M, Tsukino H, Iwasaki M, et al. Interaction between cytochrome P450  
21 gene polymorphisms and serum organochlorine TEQ levels in the risk of  
22 endometriosis. *Mol Hum Reprod* 2007;13:399-404.  
23  
24 42. Tsukino H, Hanaoka T, Sasaki H, et al. Associations between serum levels of  
25 selected organochlorine compounds and endometriosis in infertile Japanese women.  
26 *Environ Res* 2005;99:118-25.  
27  
28 43. Buck Louis GM, Hediger ML, Pena JB. Intrauterine exposures and risk of  
29 endometriosis. *Hum Reprod* 2007;22:3232-6.  
30  
31 44. Cayan F, Ertunc D, Aras-Ates N, et al. Association of G1057D variant of insulin  
32 receptor substrate-2 with endometriosis. *Fertil Steril* 2010;94:1622-6.  
33  
34 45. Coccia ME, Rizzello F, Mariani G, et al. Ovarian surgery for bilateral  
35 endometriomas influences age at menopause. *Hum Reprod* 2011;26:3000-7.  
36  
37 46. Dhillon PK, Holt VL. Recreational physical activity and endometrioma risk. *Am J*  
38 *Epidemiol* 2003;158:156-64.  
39  
40 47. Eskenazi B, Mocarelli P, Warner M, et al. Serum dioxin concentrations and  
41 endometriosis: a cohort study in Seveso, Italy. *Environ Health Perspect*  
42 2002;110:629-34.  
43  
44 48. Ferrero S, Petrerá P, Colombo BM, et al. Asthma in women with endometriosis.  
45 *Hum Reprod* 2005;20:3514-7.  
46  
47  
48  
49  
50  
51  
52  
53  
54  
55  
56  
57  
58  
59  
60

- 1  
2  
3  
4  
5 49. Heilier JF, Donnez J, Nackers F, et al. Environmental and host-associated risk  
6 factors in endometriosis and deep endometriotic nodules: a matched case-control  
7 study. *Environ Res* 2007;103:121-9.  
8  
9  
10 50. Hoffman CS, Small CM, Blanck HM, et al. Endometriosis among women exposed  
11 to polybrominated biphenyls. *Ann Epidemiol* 2007;17:503-10.  
12  
13 51. Huang PC, Tsai EM, Li WF, et al. Association between phthalate exposure and  
14 glutathione S-transferase M1 polymorphism in adenomyosis, leiomyoma and  
15 endometriosis. *Hum Reprod* 2010;25:986-94.  
16  
17 52. Huber A, Keck CC, Hefler LA, et al. Ten estrogen-related polymorphisms and  
18 endometriosis: a study of multiple gene-gene interactions. *Obstet Gynecol*  
19 2005;106:1025-31.  
20  
21 53. Jackson LW, Zullo MD, Goldberg JM. The association between heavy metals,  
22 endometriosis and uterine myomas among premenopausal women: National Health  
23 and Nutrition Examination Survey 1999-2002. *Hum Reprod* 2008;23:679-87.  
24  
25 54. Kortelahti M, Anttila MA, Hippelainen MI, et al. Obstetric outcome in women with  
26 endometriosis--a matched case-control study. *Gynecol Obstet Invest* 2003;56:207-  
27 12.  
28  
29 55. Lebel G, Dodin S, Ayotte P, et al. Organochlorine exposure and the risk of  
30 endometriosis. *Fertil Steril* 1998;69:221-8.  
31  
32 56. Marino JL, Holt VL, Chen C, et al. Lifetime occupational history and risk of  
33 endometriosis. *Scand J Work Environ Health* 2009;35:233-40.  
34  
35 57. McCarty CA, Berg RL, Welter JD, et al. A novel gene-environment interaction  
36 involved in endometriosis. *Int J Gynaecol Obstet* 2012;116:61-3.  
37  
38 58. Moen MH, Schei B. Epidemiology of endometriosis in a Norwegian county. *Acta*  
39 *Obstet Gynecol Scand* 1997;76:559-62.  
40  
41 59. Niskar AS, Needham LL, Rubin C, et al. Serum dioxins, polychlorinated biphenyls,  
42 and endometriosis: a case-control study in Atlanta. *Chemosphere* 2009;74:944-9.  
43  
44 60. Parazzini F, Cipriani S, Bianchi S, et al. Risk factors for deep endometriosis: a  
45 comparison with pelvic and ovarian endometriosis. *Fertil Steril* 2008;90:174-9.  
46  
47  
48  
49  
50  
51  
52  
53  
54  
55  
56  
57  
58  
59  
60

- 1  
2  
3  
4  
5 61. Pauwels A, Schepens PJ, D'Hooghe T, et al. The risk of endometriosis and exposure  
6 to dioxins and polychlorinated biphenyls: a case-control study of infertile women.  
7 *Hum Reprod* 2001;16:2050-5.  
8  
9  
10 62. Porpora MG, Medda E, Abballe A, et al. Endometriosis and organochlorinated  
11 environmental pollutants: a case-control study on Italian women of reproductive  
12 age. *Environ Health Perspect* 2009;117:1070-5.  
13  
14 63. Sangi-Haghpeykar H, Poindexter AN, 3rd. Epidemiology of endometriosis among  
15 parous women. *Obstet Gynecol* 1995;85:983-92.  
16  
17 64. Treloar SA, Bell TA, Nagle CM, et al. Early menstrual characteristics associated  
18 with subsequent diagnosis of endometriosis. *Am J Obstet Gynecol* 2010;202:534 e1-  
19 6.  
20  
21 65. Tsuchiya M, Miura T, Hanaoka T, et al. Effect of soy isoflavones on endometriosis:  
22 interaction with estrogen receptor 2 gene polymorphism. *Epidemiology*  
23 2007;18:402-8.  
24  
25 66. D' Avanzo B, La Vecchia C, Katsouyanni K, et al. Reliability of information on  
26 cigarette smoking and beverage consumption provided by hospital controls.  
27 *Epidemiology* 1996;7:312-5.  
28  
29 67. Lee MM, Whittemore AS, Lung DL. Reliability of recalled physical activity,  
30 cigarette smoking, and alcohol consumption. *Ann Epidemiol* 1992;2:705-14.  
31  
32 68. Patrick DL, Cheadle A, Thompson DC, et al. The validity of self-reported smoking:  
33 a review and meta-analysis. *Am J Public Health* 1994;84:1086-93.  
34  
35 69. Kirshon B, Poindexter AN, 3rd. Contraception: a risk factor for endometriosis.  
36 *Obstet Gynecol* 1988;71:829-31.  
37  
38 70. Parazzini F, Ferraroni M, Fedele L, et al. Pelvic endometriosis: reproductive and  
39 menstrual risk factors at different stages in Lombardy, northern Italy. *J Epidemiol*  
40 *Community Health* 1995;49:61-4.  
41  
42 71. Candiani GB, Danesino V, Gastaldi A, et al. Reproductive and menstrual factors  
43 and risk of peritoneal and ovarian endometriosis. *Fertil Steril* 1991;56:230-4.  
44  
45 72. Baron JA, La Vecchia C, Levi F. The antiestrogenic effect of cigarette smoking in  
46 women. *Am J Obstet Gynecol* 1990;162:502-14.  
47  
48  
49  
50  
51  
52  
53  
54  
55  
56  
57  
58  
59  
60

- 1  
2  
3  
4  
5 73. Boucher A, Mourad W, Mailloux J, et al. Ovarian hormones modulate monocyte  
6 chemotactic protein-1 expression in endometrial cells of women with endometriosis.  
7 *Mol Hum Reprod* 2000;6:618-26.  
8  
9  
10 74. Osteen KG, Bruner KL, Sharpe-Timms KL. Steroid and growth factor regulation of  
11 matrix metalloproteinase expression and endometriosis. *Semin Reprod Endocrinol*  
12 1996;14:247-55.  
13  
14 75. Parazzini F, La Vecchia C, Bocciolone L, et al. The epidemiology of endometrial  
15 cancer. *Gynecol Oncol* 1991;41:1-16.  
16  
17 76. Parazzini F, Negri E, La Vecchia C, et al. Uterine myomas and smoking. Results  
18 from an Italian study. *J Reprod Med* 1996;41:316-20.  
19  
20 77. Boffetta P, McLaughlin JK, La Vecchia C, et al. False-positive results in cancer  
21 epidemiology: a plea for epistemological modesty. *J Natl Cancer Inst*  
22 2008;100:988-95.  
23  
24 78. Practice Committee of the American Society for Reproductive Medicine. Smoking  
25 and infertility: a committee opinion. *Fertil Steril* 2012;98:1400-6.  
26  
27 79. Viganò P, Somigliana E, Panina P, et al. Principles of phenomics in endometriosis.  
28 *Hum Reprod Update* 2012;18:248-59.  
29  
30 80. Gentilini D, Perino A, Viganò P, et al. Gene expression profiling of peripheral  
31 blood mononuclear cells in endometriosis identifies genes altered in non-  
32 gynaecologic chronic inflammatory diseases. *Hum Reprod* 2011;26:3109-17.  
33  
34  
35  
36  
37  
38  
39  
40  
41  
42  
43  
44  
45  
46  
47  
48  
49  
50  
51  
52  
53  
54  
55  
56  
57  
58  
59  
60



**FIGURE LEGENDS**

**Figure 1** – Flow chart of the selection of studies on tobacco smoking and risk of endometriosis included in the meta-analysis.

**Figure 2** – Study-specific and summary relative risks (RR) of endometriosis for ever smokers versus non smokers.

CI: confidence interval.

**Figure 3** – Study-specific and summary relative risks (RR) of endometriosis for current (A) and former smokers (B) versus non smokers.

CI: confidence interval.

**Figure 4** – Study-specific and summary relative risks (RR) of endometriosis for moderate (A) and heavy (B) current smokers versus non smokers.

CI: confidence interval.

**Figure 5** – Funnel-plot of studies on tobacco smoking and risk of endometriosis.

RR: relative risk for ever smokers versus non smokers; CI: confidence interval; s.e.: standard error.

**Figure 6** - Cumulative meta-analysis of studies on tobacco smoking and risk of endometriosis.

RR: relative risk for coffee consumption versus no consumption; CI: confidence interval.



## Supplementary file

**Table 1** – Main characteristics of the studies on tobacco smoking and risk of endometriosis included in the meta-analysis.

| Study                         | Country  | Study design | Cases                                                                                                                         | Controls                                                                                                                   | Sample size cases/controls | Age (years)                                                                                     | Smoking habit                                                   | Confounding factors                                                                                                 |
|-------------------------------|----------|--------------|-------------------------------------------------------------------------------------------------------------------------------|----------------------------------------------------------------------------------------------------------------------------|----------------------------|-------------------------------------------------------------------------------------------------|-----------------------------------------------------------------|---------------------------------------------------------------------------------------------------------------------|
| Aban et al., 2007 [6]         | Turkey   | Case-control | Women with endometriosis (surgically and histologically confirmed)                                                            | Women without endometriosis (surgically confirmed) undergoing tubal ligation, infertility workup, or ovarian cystis workup | 150/150                    | mean 33.06 ± 8.67 for cases and 34.04 ± 9.68 for controls                                       | Never, current smoker                                           | Body mass index, age at menarche, education, socioeconomic status, cycle length, duration of bleeding               |
| Berubé et al., 1998 [8]       | Canada   | Case-control | Infertile women with endometriosis (laparoscopically confirmed)                                                               | Infertile women without endometriosis (laparoscopically confirmed)                                                         | 329/262                    | 20-39                                                                                           | Never, former, current smoker (<20, ≥20 cigarettes/day)         | -                                                                                                                   |
| Buck Louis et al., 2007 [43]  | USA      | Cohort       | Women with endometriosis (laparoscopically confirmed)                                                                         | Women without endometriosis                                                                                                | 32/52                      | 18-40                                                                                           | Never, ever smoker                                              | Age                                                                                                                 |
| Calhaz-Jorge et al., 2004 [5] | Portugal | Cohort       | Infertile women with endometriosis (laparoscopically confirmed); separate groups of grade I-II and grade III/IV endometriosis | Infertile women without endometriosis (laparoscopically confirmed)                                                         | 488/591                    | mean 30.9 ± 3.9 for AFS grade I/II, 30.7 ± 4.0 for ASF grade III/IV and 30.9 ± 4.2 for controls | Never, former, current smoker (1-10, 11-20, >20 cigarettes/day) | Ethnicity, dysmenorrhoea, chronic pelvic pain, cycle regularity, body mass index, previous pregnancies, ever OC use |
| Cayan et al., 2010 [44]       | Turkey   | Case-control | Women with endometriosis (laparoscopically confirmed)                                                                         | Women without endometriosis (laparoscopically confirmed)                                                                   | 135/135                    | mean 39.36 ± 8.88 for cases and 41.6 ± 8.92 for controls                                        | Non smoker, smoker                                              | -                                                                                                                   |
| Chapron et al., 2010 [9]      | France   | Case-control | Women with endometriosis (laparoscopically confirmed)                                                                         | Women without endometriosis (laparoscopically confirmed)                                                                   | 411/567                    | <42 years                                                                                       | Ever, former, current smoker                                    | Age, ethnicity, gravidity, parity, infertility, body mass index                                                     |

1  
2  
3  
4  
5  
6  
7  
8  
9  
10  
11  
12  
13  
14  
15  
16  
17  
18  
19  
20  
21  
22  
23  
24  
25  
26  
27  
28  
29  
30  
31  
32  
33  
34  
35  
36  
37  
38  
39  
40  
41  
42  
43  
44  
45  
46  
47  
48  
49

| Study                      | Country | Study design | Cases                                                                                                                                                                          | Controls                                                                                                                                                                          | Sample size cases/controls | Age (years)                                           | Smoking habit                                  | Confounding factors                                                                                            |
|----------------------------|---------|--------------|--------------------------------------------------------------------------------------------------------------------------------------------------------------------------------|-----------------------------------------------------------------------------------------------------------------------------------------------------------------------------------|----------------------------|-------------------------------------------------------|------------------------------------------------|----------------------------------------------------------------------------------------------------------------|
| Coccia et al., 2011 [45]   | Italy   | Cohort       | Women with endometriosis (laparoscopically confirmed)<br>Separate groups of monolateral and bilateral endometriosis                                                            | Women without endometriosis (laparoscopically confirmed)                                                                                                                          | 239/63                     | mean 32.6 ± 5.6                                       | Never, former, current smoker                  | -                                                                                                              |
| Cramer et al., 1986 [7]    | USA     | Case-control | Infertile women with endometriosis                                                                                                                                             | Women admitted to hospital for delivery                                                                                                                                           | 268/3794                   | NA                                                    | Never, former, current smoker                  | Center, age, education, religion, years since menarche, menstrual pain, cycle length, weight, height, exercise |
| Dhillon et al., 2003 [46]  | USA     | Case-control | Women with cystic ovarian endometriosis (endometrioma)                                                                                                                         | Women receiving care from the same health maintenance organization                                                                                                                | 77/735                     | 18-39                                                 | Non smoker, smoker (≤0.5, 0.5-1, ≥1 packs/day) | -                                                                                                              |
| Eskenazi et al., 2002 [47] | Italy   | Cohort       | Women ≤30 yrs in 1976 with stored sera resident near Seveso in 1976, with endometriosis (confirmed through laparoscopy, laparotomy or ultrasound)                              | Women ≤30 yrs in 1976 with stored sera resident near Seveso in 1976                                                                                                               | 19/277                     | ≥20                                                   | Never, former, current smoker                  | -                                                                                                              |
| Ferrero et al., 2005 [48]  | Italy   | Case-control | Women of reproductive age undergoing surgery because of uterine myomas, ovarian cysts, pelvic pain, dysmenhorrea, or infertility with endometriosis (histologically confirmed) | Women of reproductive age undergoing surgery because of uterine myomas, ovarian cysts, pelvic pain, dysmenhorrea, or infertility without endometriosis (histologically confirmed) | 467/412                    | mean 34.3 ± 6.0 for cases and 34.5 ± 4.9 for controls | Never, former, current smoker                  | -                                                                                                              |

1  
2  
3  
4  
5  
6  
7  
8  
9  
10  
11  
12  
13  
14  
15  
16  
17  
18  
19  
20  
21  
22  
23  
24  
25  
26  
27  
28  
29  
30  
31  
32  
33  
34  
35  
36  
37  
38  
39  
40  
41  
42  
43  
44  
45  
46  
47  
48  
49

| Study                                                      | Country            | Study design | Cases                                                                                                                                                     | Controls                                                                                                                                 | Sample size cases/controls | Age (years)                                           | Smoking habit                                           | Confounding factors                            |
|------------------------------------------------------------|--------------------|--------------|-----------------------------------------------------------------------------------------------------------------------------------------------------------|------------------------------------------------------------------------------------------------------------------------------------------|----------------------------|-------------------------------------------------------|---------------------------------------------------------|------------------------------------------------|
| Gruppo Italiano per lo Studio dell'endometriosi, 1999 [10] | Italy              | Case-control | Women with infertility or pelvic pain with endometriosis (laparoscopically confirmed); separate groups of pelvic pain and infertility                     | Women with infertility or pelvic pain without endometriosis (laparoscopically confirmed); separate groups of pelvic pain and infertility | 345/472                    | 18-43                                                 | Never, former, current smoker (<10, ≥10 cigarettes/day) | Age, parity, center, education, marital status |
| Heilier et al., 2007 [49]                                  | Belgium            | Case-control | Women with peritoneal endometriosis or deep endometriotic nodules (surgically confirmed); separate groups of endometriosis and deep endometriotic nodules | Women who consulted the same gynecologists of cases, with no clinical evidence of endometriosis                                          | 88+88/88                   | 21-50                                                 | Never, former, current smoker                           | -                                              |
| Hoffman et al., 2007 [50]                                  | USA                | Cohort       | Women enrolled in the Michigan Polybrominated Biphenyls cohort, with self-reported endometriosis                                                          | Women enrolled in the Michigan Polybrominated Biphenyls cohort, without endometriosis                                                    | 79/864                     | mean 45 ± 14.4                                        | Non, current smoker (1-15, >15 cigarettes/day)          | .                                              |
| Huang al., 2010 [51]                                       | Taiwan             | Case-control | Women with endometriosis (laparoscopically confirmed)                                                                                                     | Women without endometriosis, adenomyosis and leiomyomas (laparoscopically confirmed)                                                     | 28/29                      | mean 34.3 ± 7.5 for cases and 36.2 ± 9.0 for controls | Current smoker                                          | -                                              |
| Huber et al., 2005 [52]                                    | Austria            | Case-control | Women with endometriosis (surgically and histologically confirmed)                                                                                        | Healthy women without endometriosis (based on personal interview)                                                                        | 32/790                     | mean 52.3 ± 5.4 for cases and 34.6 ± 7.0 for controls | Ever smoker                                             | -                                              |
| Jackson et al., 2008 [53]                                  | USA (NHANES study) | Case-control | Women with self-reported diagnosis of endometriosis                                                                                                       | Women without self-reported diagnosis of endometriosis                                                                                   | 61/1362                    | 20-49                                                 | Never, former, current smoker                           | -                                              |

1  
2  
3  
4

| Study                           | Country | Study design                    | Cases                                                                                       | Controls                                                                                                                                     | Sample size cases/controls | Age (years)                                               | Smoking habit                                                          | Confounding factors                                                       |
|---------------------------------|---------|---------------------------------|---------------------------------------------------------------------------------------------|----------------------------------------------------------------------------------------------------------------------------------------------|----------------------------|-----------------------------------------------------------|------------------------------------------------------------------------|---------------------------------------------------------------------------|
| Kortelahti et al., 2003 [54]    | Finland | Case-control                    | Women with endometriosis (histologically confirmed)                                         | Women who underwent laparoscopy for tubal sterilization, and women who underwent in vitro fertilization for reasons other than endometriosis | 137/137                    | mean 31.2 ± 5.1 for cases and 34.0 ± 4.6 for controls     | Current smoker                                                         | -                                                                         |
| Lebel et al., 1998 [55]         | Canada  | Case-control                    | Premenopausal women with endometriosis (laparoscopically confirmed)                         | Premenopausal women without endometriosis (laparoscopically confirmed)                                                                       | 86/70                      | 18-50                                                     | Current non smoker                                                     | -                                                                         |
| Marino et al., 2009 [56]        | USA     | Case-control                    | Women enrolled in a health maintenance organization with surgically confirmed endometriosis | Women enrolled in a health maintenance organization without endometriosis                                                                    | 313/727                    | 18-49                                                     | Never, former, current smoker                                          | -                                                                         |
| Matalliotakis et al., 2008 [12] | USA     | Case-control                    | Women with endometriosis (laparoscopically confirmed)                                       | Infertile women without endometriosis undergoing laparoscopy                                                                                 | 535/200                    | 15-56                                                     | Current smoker                                                         | -                                                                         |
| Matorras et al., 1995 [3]       | Spain   | Case-control                    | Infertile women with endometriosis (laparoscopically confirmed)                             | Infertile women without endometriosis (laparoscopically confirmed)                                                                           | 174/174                    | mean 29.49 ± 3.41 for cases and 29.58 ± 3.66 for controls | Current smoker                                                         | -                                                                         |
| McCarty et al., 2012 [57]       | USA     | Case-control                    | Women with endometriosis (laparoscopically confirmed)                                       | Women without endometriosis (laparoscopically confirmed)                                                                                     | 796/501                    | ≥18                                                       | Never smoker                                                           | -                                                                         |
| Missmer et al., 2004 [13]       | USA     | Cohort (Nurses Health Study II) | Women with self-reported endometriosis                                                      | Women aged without self-reported endometriosis                                                                                               | 1721/88344                 | 25-52                                                     | Never, former, current smoker (1-14, 15-24, 25-34, ≥35 cigarettes/day) | Age, calendar time, race, parity, body mass index at 18, alcohol drinking |
| Moen et al., 1997 [58]          | Norway  | Case-control                    | Women with self-reported endometriosis                                                      | Women aged without self-reported endometriosis                                                                                               | 79/3955                    | 40-42                                                     | Current smoker                                                         | -                                                                         |

43  
44  
45  
46  
47  
48  
49

1  
2  
3  
4  
5  
6  
7  
8  
9  
10  
11  
12  
13  
14  
15  
16  
17  
18  
19  
20  
21  
22  
23  
24  
25  
26  
27  
28  
29  
30  
31  
32  
33  
34  
35  
36  
37  
38  
39  
40  
41  
42  
43  
44  
45  
46  
47  
48  
49

| Study                              | Country | Study design | Cases                                                                                                                                                                      | Controls                                                                                                                                                                                             | Sample size cases/controls | Age (years) | Smoking habit                                                         | Confounding factors        |
|------------------------------------|---------|--------------|----------------------------------------------------------------------------------------------------------------------------------------------------------------------------|------------------------------------------------------------------------------------------------------------------------------------------------------------------------------------------------------|----------------------------|-------------|-----------------------------------------------------------------------|----------------------------|
| Niskar et al., 2009 [59]           | USA     | Case-control | Nulliparous women seeking reproductive assistance with endometriosis (laparoscopically confirmed)                                                                          | Nulliparous women seeking reproductive assistance without endometriosis                                                                                                                              | 60/64                      | 20-45       | Ever smoker                                                           | -                          |
| Parazzini et al., 2008 [60]        | Italy   | Case-control | Women with deep endometriosis or pelvic and ovarian endometriosis (laparoscopically confirmed); separate groups of deep endometriosis and pelvic and ovarian endometriosis | Women without endometriosis admitted to hospital for acute non-gynecological, non-hormonal, non-neoplastic conditions, participating as controls in a case-control study on female genital neoplasms | 181 + 162/329              | 20-55       | Never, former, current                                                | -                          |
| Pauwels et al., 2001 [61]          | Belgium | Case-control | Infertile women with endometriosis (laparoscopically confirmed)                                                                                                            | Infertile women without endometriosis (laparoscopically confirmed)                                                                                                                                   | 42/27                      | 24-42       | Non smokers                                                           | -                          |
| Porpora et al., 2009 [62]          | Italy   | Case-control | Women with endometriosis (laparoscopically confirmed)                                                                                                                      | Women without endometriosis who underwent laparoscopy for benign gynecological conditions (unrelated to infertility)                                                                                 | 80/78                      | 18-45       | Never, former, current smokers (1-9, 10-19, $\geq 20$ cigarettes/day) | -                          |
| Sangi-Haghpeykar et al., 1995 [63] | USA     | Case-control | Women undergoing laparoscopic tubal sterilization with endometriosis                                                                                                       | Women undergoing laparoscopic tubal sterilization without endometriosis                                                                                                                              | 126/504                    | NA          | Never, former, current smoker (< 1 pack/day, $\geq 1$ pack/day)       | Age, number of live births |

1  
2  
3  
4  
5  
6  
7  
8  
9  
10  
11  
12  
13  
14  
15  
16  
17  
18  
19  
20  
21  
22  
23  
24  
25  
26  
27  
28  
29  
30  
31  
32  
33  
34  
35  
36  
37  
38  
39  
40  
41  
42  
43  
44  
45  
46  
47  
48  
49

| Study                        | Country   | Study design | Cases                                                                                                                                                   | Controls                                                                                                                               | Sample size cases/controls | Age (years) | Smoking habit                 | Confounding factors |
|------------------------------|-----------|--------------|---------------------------------------------------------------------------------------------------------------------------------------------------------|----------------------------------------------------------------------------------------------------------------------------------------|----------------------------|-------------|-------------------------------|---------------------|
| Signorello et al., 1997 [14] | USA       | Case-control | Women with infertility-associated endometriosis (laparoscopically confirmed)                                                                            | fertile and infertile women both without endometriosis (laparoscopically confirmed); separate groups of fertile and infertile controls | 50/89 + 47                 | 23-44       | Never, ever smoker            | -                   |
| Treloar et al., 2010 [64]    | Australia | Case-control | Women with endometriosis (surgically confirmed ) with no first degree relative with endometriosis                                                       | Same-sex female twin pairs enrolled with the Australian Twin Registry, without endometriosis (self-reported)                           | 268/244                    | 18-55       | Never, former, current smoker | -                   |
| Tsuchiya et al., 2007 [65]   | Japan     | Case-control | Women who had not given birth or lactate, with endometriosis (laparoscopically confirmed); separate groups of stage I/II and stage III/IV endometriosis | Women who had not given birth or lactate without endometriosis (laparoscopically confirmed)                                            | 79/59                      | 20-45       | Never, ever smoker            | -                   |

NA: not available; NHANES: National Health and Nutrition Examination Survey; OC: oral contraceptiv

1  
2  
3  
4  
5  
6  
7  
8  
9  
10  
11  
12  
13  
14  
15  
16  
17  
18  
19  
20  
21  
22  
23  
24  
25  
26  
27  
28  
29  
30  
31  
32  
33  
34  
35  
36  
37  
38  
39  
40  
41  
42  
43  
44  
45  
46  
47  
48  
49

1

For peer review only

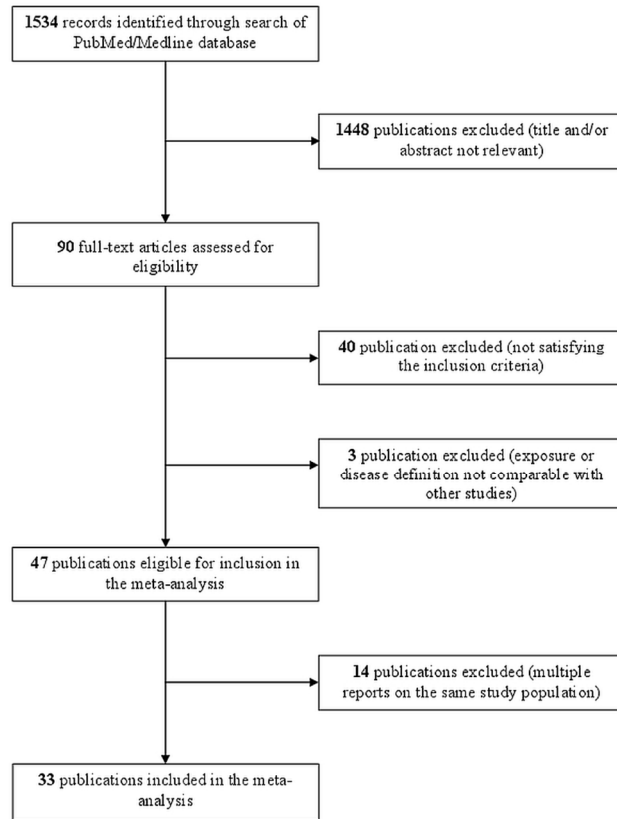

Figure 1 – Flow chart of the selection of studies on tobacco smoking and risk of endometriosis included in the meta-analysis.



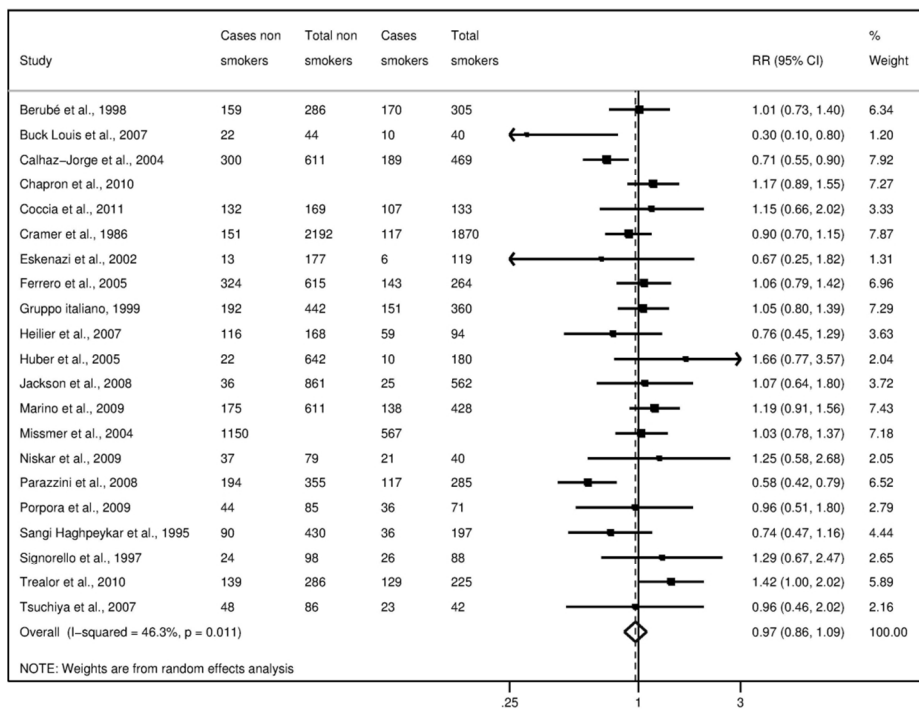

Figure 2 – Study-specific and summary relative risks (RR) of endometriosis for ever smokers versus non smokers.

For peer review only

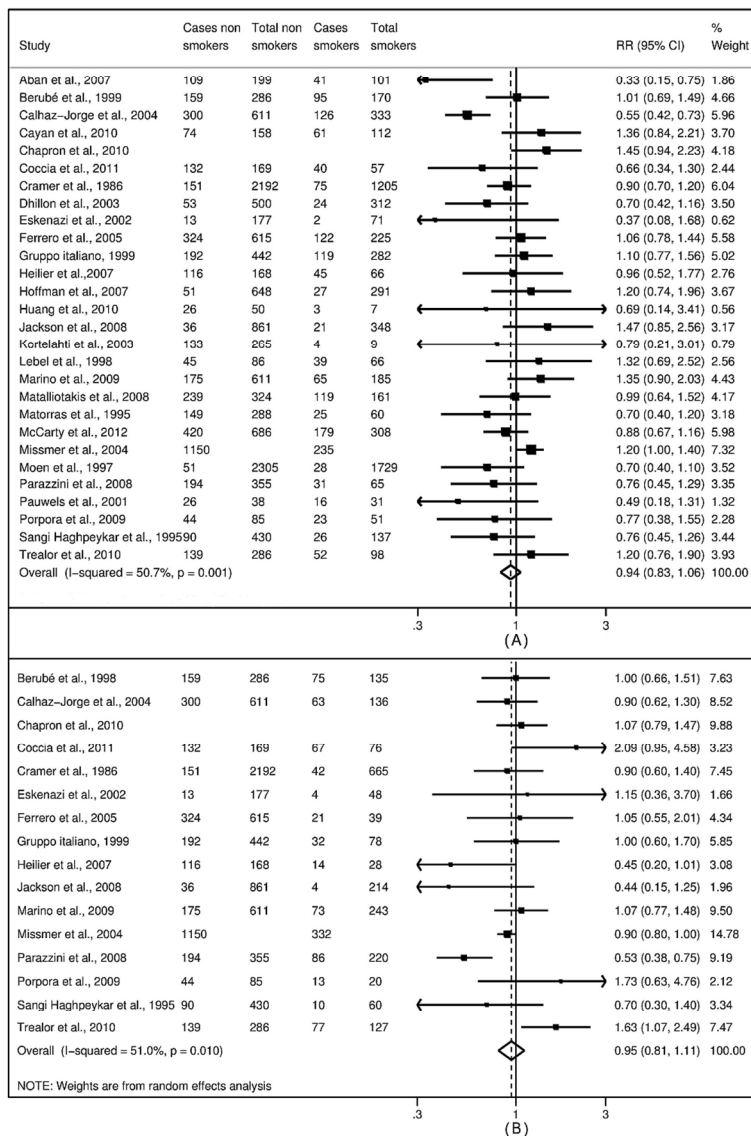

Figure 3 – Study-specific and summary relative risks (RR) of endometriosis for current (A) and former smokers (B) versus non smokers.  
CI: confidence interval.

1  
2  
3  
4  
5  
6  
7  
8  
9  
10  
11  
12  
13  
14  
15  
16  
17  
18  
19  
20  
21  
22  
23  
24  
25  
26  
27  
28  
29  
30  
31  
32  
33  
34  
35  
36  
37  
38  
39  
40  
41  
42  
43  
44  
45  
46  
47  
48  
49  
50  
51  
52  
53  
54  
55  
56  
57  
58  
59  
60

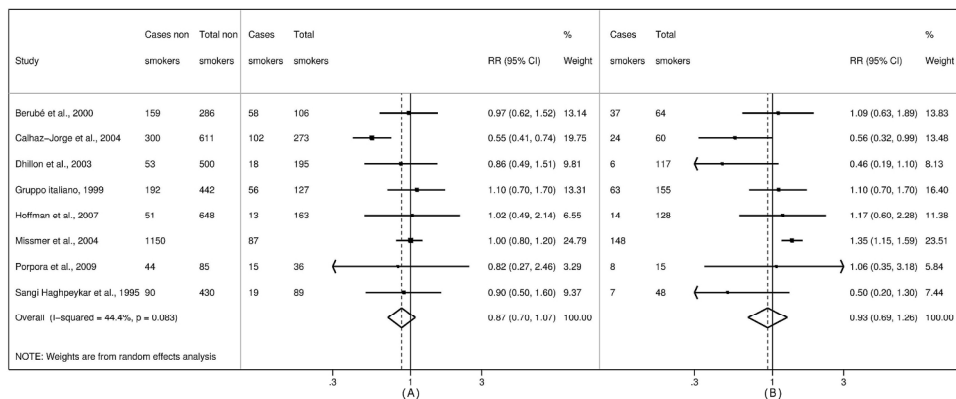

Figure 4 – Study-specific and summary relative risks (RR) of endometriosis for moderate (A) and heavy (B) current smokers versus non smokers.  
CI: confidence interval.

1  
2  
3  
4  
5  
6  
7  
8  
9  
10  
11  
12  
13  
14  
15  
16  
17  
18  
19  
20  
21  
22  
23  
24  
25  
26  
27  
28  
29  
30  
31  
32  
33  
34  
35  
36  
37  
38  
39  
40  
41  
42  
43  
44  
45  
46  
47  
48  
49  
50  
51  
52  
53  
54  
55  
56  
57  
58  
59  
60

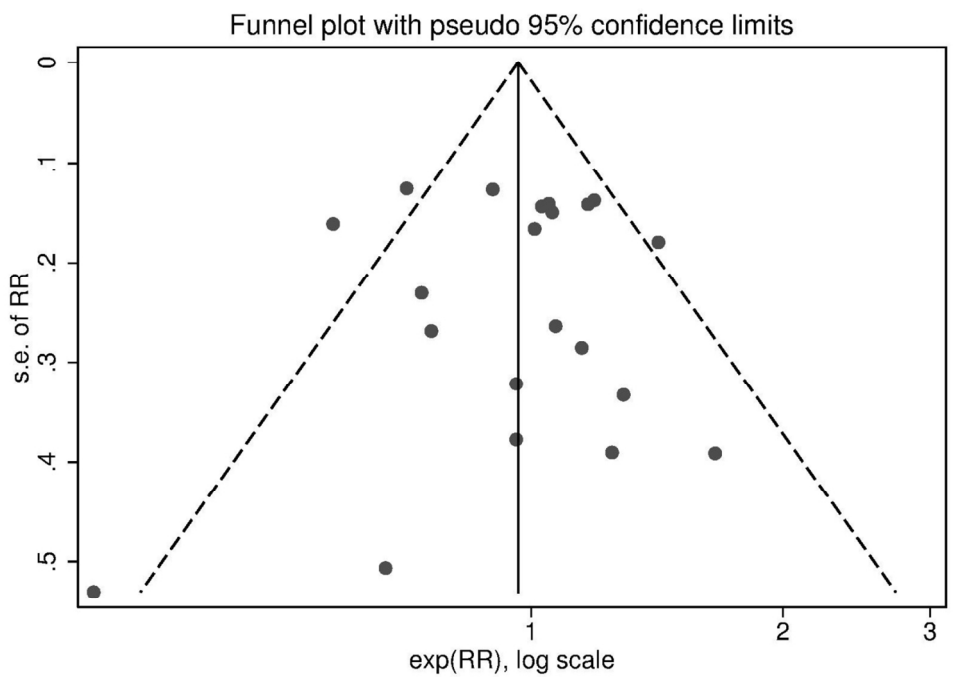

Figure 5 – Funnel-plot of studies on tobacco smoking and risk of endometriosis.  
RR: relative RR for ever smokers versus non smokers; CI: confidence interval; s.e.: standard error

Review only

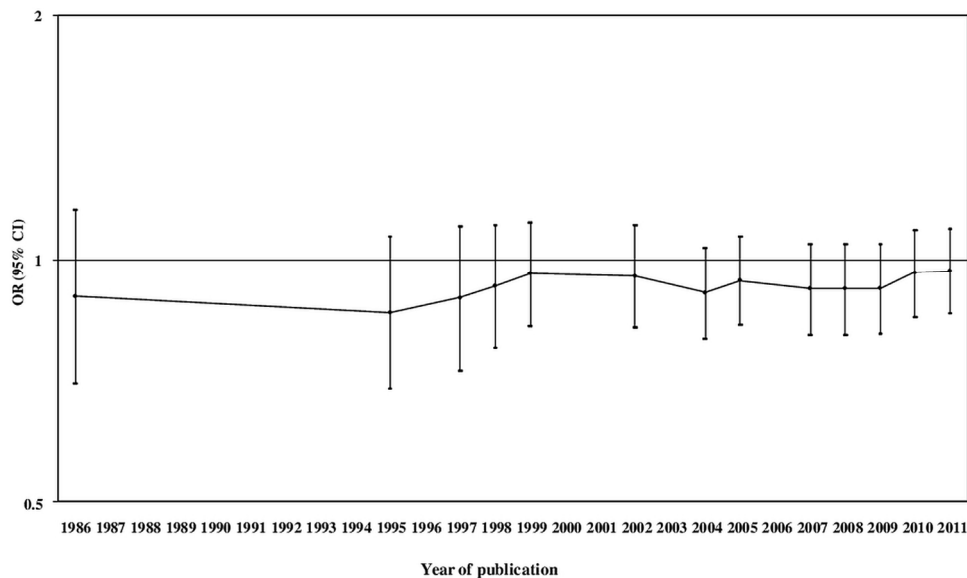

Figure 6 - Cumulative meta-analysis of studies on tobacco smoking and risk of endometriosis.  
 RR: relative risk for coffee consumption versus no consumption; CI: confidence interval.

Review only

## MOOSE Guidelines for Meta-Analyses and Systematic Reviews of Observational Studies\*

|    |                        |                                                                                                                                                                                                                                                                 |                |
|----|------------------------|-----------------------------------------------------------------------------------------------------------------------------------------------------------------------------------------------------------------------------------------------------------------|----------------|
| 1  |                        |                                                                                                                                                                                                                                                                 |                |
| 2  |                        |                                                                                                                                                                                                                                                                 |                |
| 3  |                        |                                                                                                                                                                                                                                                                 |                |
| 4  |                        |                                                                                                                                                                                                                                                                 |                |
| 5  |                        |                                                                                                                                                                                                                                                                 |                |
| 6  |                        |                                                                                                                                                                                                                                                                 |                |
| 7  |                        |                                                                                                                                                                                                                                                                 |                |
| 8  |                        |                                                                                                                                                                                                                                                                 |                |
| 9  |                        |                                                                                                                                                                                                                                                                 |                |
| 10 | <b>Title</b>           | Identify the study as a meta-analysis (or systematic review)                                                                                                                                                                                                    |                |
| 11 | <b>Abstract</b>        | Use the journal's structured format                                                                                                                                                                                                                             |                |
| 12 |                        |                                                                                                                                                                                                                                                                 |                |
| 13 | <b>Introduction</b>    | <b>Present</b>                                                                                                                                                                                                                                                  | OK             |
| 14 |                        | • The clinical problem                                                                                                                                                                                                                                          | OK             |
| 15 |                        | • The hypothesis                                                                                                                                                                                                                                                |                |
| 16 |                        | • A statement of objectives that includes the study population, the condition of interest, the exposure or intervention, and the outcome(s) considered                                                                                                          | OK             |
| 17 |                        |                                                                                                                                                                                                                                                                 |                |
| 18 |                        |                                                                                                                                                                                                                                                                 |                |
| 19 | <b>Sources</b>         | <b>Describe</b>                                                                                                                                                                                                                                                 | OK             |
| 20 |                        | • Qualifications of searchers (eg, librarians and investigators)                                                                                                                                                                                                |                |
| 21 |                        | • Search strategy, including time period included in the synthesis and keywords                                                                                                                                                                                 | OK             |
| 22 |                        | • Effort to include all available studies, including contact with authors                                                                                                                                                                                       | OK             |
| 23 |                        | • Databases and registries searched                                                                                                                                                                                                                             | OK             |
| 24 |                        | • Search software used, name and version, including special features used (eg, explosion)                                                                                                                                                                       | OK             |
| 25 |                        | • Use of hand searching (eg, reference lists of obtained articles)                                                                                                                                                                                              | OK             |
| 26 |                        | • List of citations located and those excluded, including justification                                                                                                                                                                                         | OK             |
| 27 |                        | • Method of addressing articles published in languages other than English                                                                                                                                                                                       | OK             |
| 28 |                        | • Method of handling abstracts and unpublished studies                                                                                                                                                                                                          | OK             |
| 29 |                        | • Description of any contact with authors                                                                                                                                                                                                                       | not applicable |
| 30 | <b>Study Selection</b> | <b>Describe</b>                                                                                                                                                                                                                                                 |                |
| 31 |                        | • Types of study designs considered                                                                                                                                                                                                                             | OK             |
| 32 |                        | • Relevance or appropriateness of studies gathered for assessing the hypothesis to be tested                                                                                                                                                                    | OK             |
| 33 |                        | • Rationale for the selection and coding of data (eg, sound clinical principles or convenience)                                                                                                                                                                 | OK             |
| 34 |                        | • Documentation of how data were classified and coded (eg, multiple raters, blinding, and interrater reliability)                                                                                                                                               | OK             |
| 35 |                        | • Assessment of confounding (eg, comparability of cases and controls in studies where appropriate)                                                                                                                                                              | OK             |
| 36 |                        | • Assessment of study quality, including blinding of quality assessors; stratification or regression on possible predictors of study results                                                                                                                    | OK             |
| 37 |                        | • Assessment of heterogeneity                                                                                                                                                                                                                                   | OK             |
| 38 |                        | • Statistical methods (eg, complete description of fixed or random effects models, justification of whether the chosen models account for predictors of study results, dose-response models, or cumulative meta-analysis) in sufficient detail to be replicated | OK             |
| 39 |                        |                                                                                                                                                                                                                                                                 |                |
| 40 |                        |                                                                                                                                                                                                                                                                 |                |
| 41 |                        |                                                                                                                                                                                                                                                                 |                |
| 42 | <b>Results</b>         | <b>Present</b>                                                                                                                                                                                                                                                  |                |
| 43 |                        | • A graph summarizing individual study estimates and the overall estimate                                                                                                                                                                                       | OK             |
| 44 |                        | • A table giving descriptive information for each included study                                                                                                                                                                                                | OK             |
| 45 |                        | • Results of sensitivity testing (eg, subgroup analysis)                                                                                                                                                                                                        | OK             |
| 46 |                        | • Indication of statistical uncertainty of findings                                                                                                                                                                                                             | OK             |
| 47 |                        |                                                                                                                                                                                                                                                                 |                |
| 48 | <b>Discussion</b>      | <b>Discuss</b>                                                                                                                                                                                                                                                  |                |
| 49 |                        | • Strengths and weaknesses                                                                                                                                                                                                                                      | OK             |
| 50 |                        | • Potential biases in the review process (eg, publication bias)                                                                                                                                                                                                 | OK             |
| 51 |                        | • Justification for exclusion (eg, exclusion of non-English-language citations)                                                                                                                                                                                 | not applicable |
| 52 |                        | • Assessment of quality of included studies                                                                                                                                                                                                                     | OK             |
| 53 |                        | • Consideration of alternative explanations for observed results                                                                                                                                                                                                | OK             |
| 54 |                        | • Generalization of the conclusions (ie, appropriate for the data presented and within the domain of the literature review)                                                                                                                                     | OK             |
| 55 |                        | • Guidelines for future research                                                                                                                                                                                                                                | OK             |
| 56 |                        | • Disclosure of funding source                                                                                                                                                                                                                                  | OK             |
| 57 |                        |                                                                                                                                                                                                                                                                 |                |
| 58 |                        |                                                                                                                                                                                                                                                                 |                |
| 59 |                        |                                                                                                                                                                                                                                                                 |                |
| 60 |                        |                                                                                                                                                                                                                                                                 |                |

\*Modified from Stroup DF, Berlin JA, Morton SC, Olkin I, Williamson GD, Rennie D, et al. Meta-analysis of observational studies in epidemiology: a proposal for reporting. Meta-analysis Of Observational Studies in Epidemiology (MOOSE) group. JAMA 2000;283:2008-12. Copyrighted © 2000, American Medical Association. All rights reserved.

*John A....*

# BMJ Open

## Tobacco smoking and risk of endometriosis: a systematic review and meta-analysis

|                                 |                                                                                                                                                                                                                                                                                                                                                                                                                                                                                                                                                                                                                                                                        |
|---------------------------------|------------------------------------------------------------------------------------------------------------------------------------------------------------------------------------------------------------------------------------------------------------------------------------------------------------------------------------------------------------------------------------------------------------------------------------------------------------------------------------------------------------------------------------------------------------------------------------------------------------------------------------------------------------------------|
| Journal:                        | <i>BMJ Open</i>                                                                                                                                                                                                                                                                                                                                                                                                                                                                                                                                                                                                                                                        |
| Manuscript ID:                  | bmjopen-2014-006325.R1                                                                                                                                                                                                                                                                                                                                                                                                                                                                                                                                                                                                                                                 |
| Article Type:                   | Research                                                                                                                                                                                                                                                                                                                                                                                                                                                                                                                                                                                                                                                               |
| Date Submitted by the Author:   | 24-Oct-2014                                                                                                                                                                                                                                                                                                                                                                                                                                                                                                                                                                                                                                                            |
| Complete List of Authors:       | Bravi, Francesca; University of Milano, Dept. Clinical Sciences<br>Parazzini, Fabio; Fondazione Ca' Granda, Ospedale Maggiore Policlinico, Dept. Obstetrics, Gynecology and Neonatology<br>Cipriani, Sonia; University of Milano, Dept. Clinical Sciences<br>Chiapparino, Francesca; Fondazione Ca' Granda, Ospedale Maggiore Policlinico, Dept. Obstetrics, Gynecology and Neonatology<br>Ricci, Elena; Fondazione Ca' Granda, Ospedale Maggiore Policlinico, Dept. Obstetrics, Gynecology and Neonatology<br>Chiantera, Vito; Dept. Gynecology<br>Viganò, Paola; San Raffaele Scientific Institute, La Vecchia, Carlo; University of Milano, Dept. Clinical Sciences |
| <b>Primary Subject Heading</b>: | Obstetrics and gynaecology                                                                                                                                                                                                                                                                                                                                                                                                                                                                                                                                                                                                                                             |
| Secondary Subject Heading:      | Epidemiology, Obstetrics and gynaecology, Respiratory medicine, Smoking and tobacco                                                                                                                                                                                                                                                                                                                                                                                                                                                                                                                                                                                    |
| Keywords:                       | GYNAECOLOGY, Reproductive medicine < GYNAECOLOGY, EPIDEMIOLOGY                                                                                                                                                                                                                                                                                                                                                                                                                                                                                                                                                                                                         |
|                                 |                                                                                                                                                                                                                                                                                                                                                                                                                                                                                                                                                                                                                                                                        |

SCHOLARONE™  
Manuscripts

only

**Tobacco smoking and risk of endometriosis: a systematic review and meta-analysis**

Francesca Bravi (1), Fabio Parazzini (1,2), Sonia Cipriani (1,2), Francesca Chiaffarino (2), Elena Ricci (2), Vito Chiantera (3), Paola Viganò (4), Carlo La Vecchia (1)

(1) Department of Clinical Sciences and Community Health, University of Milan, via Commenda, 12, 20122 Milan, Italy

(2) Department of Obstetrics, Gynecology and Neonatology, IRCSS Fondazione Ca' Granda, Ospedale Maggiore Policlinico, Via Francesco Sforza, 28, 20122 Milano, Italy

(3) Department of Gynecology, Charité Universitätsmedizin, Charitestraße 1, 10117 Berlin, Germany.

(4) Obstetrics and Gynecology Unit, San Raffaele Scientific Institute, Via Olgettina, 60, 20132 Milan, Italy

**Short title:** Tobacco smoking and endometriosis.

**Keywords:** endometriosis; tobacco smoking; meta-analysis.

**Word count:** 2400 - excluding title page, abstract, references, figures and tables.

**Corresponding author:**

Fabio Parazzini

Dipartimento di Scienze Cliniche e di Comunità, Università di Milano, Fondazione IRCCS Ca' Granda Ospedale Maggiore Policlinico, Via Commenda 12, 20122 Milano, Italy. Tel.: +39 02 55032318; fax: +39 02 550320252.

E-mail address: [Fabio.Parazzini@unimi.it](mailto:Fabio.Parazzini@unimi.it)

**Abbreviations:** CI: confidence interval, HR: hazard ratio, MOOSE: meta-analysis of observational studies in epidemiology, OR: odds ratio, RR: relative risk.



## ABSTRACT

**Objective:** Since conflicting results have been published on the role of tobacco smoking on the risk of endometriosis, we provide an up to date summary quantification of this potential association.

**Design:** We performed a PubMed/MEDLINE search of the relevant publications up to September 2014, considering studies on humans published in English. We searched the reference list of the identified papers to identify other relevant publications. Both case-control or cohort studies have been included reporting risk estimates on the association between tobacco smoking and endometriosis. Thirty-eight out of the 1,758 screened papers met the inclusion criteria. The selected studies included a total of 13,129 women diagnosed with endometriosis.

**Setting:** Academic hospitals

**Main outcome measures:** Risk of endometriosis in tobacco smokers.

**Results:** We obtained the summary estimates of the relative risk (RR) using the random-effect model, and assessed the heterogeneity among studies using the  $\chi^2$  test and quantified it using the  $I^2$  statistic. As compared to never smokers, the summary RR were 0.96 (95% confidence interval, CI: 0.86-1.08) for ever smokers, 0.93 (95% CI: 0.77-1.12) for former smokers, 0.94 (95% CI:0.81-1.10) for current smokers, 0.87 (95% CI: 0.70-1.07) for moderate smokers, and 0.93 (95% CI: 0.69-1.26) for heavy smokers.

**Conclusions:** The present meta-analysis provided no evidence for an association between tobacco smoking and the risk of endometriosis. The results were consistent considering ever, former, current, moderate, and heavy smokers, and across type of endometriosis and study design.

**Strengths and limitations of the study**

- Meta-analysis including 38 papers without any relevant asymmetry in the funnel plot.
- The Egger's test was not statistically significant.
- In some studies, choice of the cases as asymptomatic without distinguishing factors related to endometriosis to those associated to pelvic pain or infertility.
- In some studies, choice of controls in whom disease was not laparoscopically ruled out.
- Tobacco smoking based on patients' self-reported information.

## INTRODUCTION

Endometriosis is an estrogen-dependent, chronic inflammatory gynecological condition characterized by the proliferation of functional endometrial tissue that develops outside the uterine cavity, which may cause pain and infertility<sup>1</sup>. However, despite its relatively high prevalence, which spans from 20% in asymptomatic women<sup>2</sup>, to 30% in women with infertility<sup>3</sup>, and 45% in women with pain symptoms<sup>4</sup>, risk factors for this condition remain largely unknown.

Among the risk factors investigated, some studies have examined the role of tobacco smoking. In a Portuguese study investigating clinical and lifestyle factors in infertile women, current smokers had a decreased risk of endometriosis as compared to non-smokers or former smokers<sup>5</sup>. In a case-control study from Turkey evaluating the interaction between tobacco smoking and glutathione-S-transferase gene polymorphism as a risk factor for endometriosis, an inverse association between smoking and endometriosis was observed<sup>6</sup>. In a case-control study carried out in the USA, infertile women with endometriosis and fertile controls were compared and a decreased risk of endometriosis was found, though limited to women who begun smoking at an early age and were heavy smokers<sup>7</sup>. Other studies did not find significant association<sup>3, 8-14</sup>.

The biological plausibility potentially linking smoking and endometriosis resides in its endocrine and inflammatory mechanisms. Smoke compounds disrupt steroidogenesis, leading to impairment of E2 synthesis<sup>15, 16</sup> and progesterone synthesis deficiency<sup>17-19</sup>. Moreover, smoking has a strong effect on inflammatory mediators in both the pulmonary and extra-pulmonary environments and can further trigger inflammation associated with the disease resulting in pro-inflammatory gene overexpression<sup>20</sup>.

A clear definition of the relation between smoking and endometriosis risk has an interest in order to better understand the role of estrogens, in consideration of the potential anti estrogenic effect of smoking. Otherwise in clinical term, a direct association as reported in some studies<sup>6, 7</sup> may suggest preventive measures.

1  
2  
3 Thus, in order to investigate the possible relation between tobacco smoking and endometriosis, and  
4  
5 to provide an overall quantitative estimate of any such relation, we combined in a meta-analysis all  
6  
7 published data on the issue.  
8  
9

## 10 11 12 **MATERIALS AND METHODS**

### 13 14 *Search strategy*

15  
16 We performed a PubMed/MEDLINE search of papers published between 1966 and September  
17  
18 2014, using the terms “tobacco” or “smoking” or “cigarette” in combination with “risk factor”, or  
19  
20 “epidemiology”, and “endometriosis”, following the MOOSE (Meta-analysis of Observational  
21  
22 Studies in Epidemiology) guidelines<sup>21</sup>; details on the search terms are provided in Appendix. We  
23  
24 selected only studies on humans, published as full-length papers in English. No effort was made to  
25  
26 identify papers published in other languages or unpublished studies. Moreover, we reviewed the  
27  
28 reference lists of the retrieved papers, to identify any other relevant publication. Studies were  
29  
30 included in the meta-analysis if: a) they were based on case-control or cohort studies, reporting  
31  
32 original data; b) they reported information on the association between tobacco smoking and  
33  
34 endometriosis, including estimates of the relative risk (RR) (approximated by the odds ratio, OR, in  
35  
36 case-control studies) , with the corresponding 95% confidence intervals (CI), or frequency  
37  
38 distribution to calculate them; c) diagnosis of endometriosis was histologically confirmed and/or  
39  
40 clinically based. When we found more than one publication based on the same study population and  
41  
42 data, we included only the one with most detailed information, or published most recently.  
43  
44 We used the Newcastle-Ottawa Scale<sup>22</sup> to assess the quality of individual studies and performed a  
45  
46 sensitivity analysis according to the quality of each study.  
47  
48  
49  
50

### 51 52 *Data extraction for the meta-analysis*

53  
54 Two authors (FB and SC) reviewed the manuscripts and independently selected the eligible  
55  
56 manuscripts; disagreements were resolved by discussion. From each publication we extracted the  
57  
58  
59  
60

1  
2  
3 following information: country of origin; study design; number and characteristics of subjects  
4 (cases, controls or cohort size); age, if available; categories of tobacco smoking, if available;  
5 measures of association (RR, or OR) of endometriosis and corresponding 95% CI for every  
6 category of tobacco smoking, or frequency distribution to calculate them; confounding variables  
7 allowed for in the statistical analysis, if any. When more than one regression model was provided,  
8 estimates adjusted for the largest number of confounding variables were considered.  
9  
10  
11  
12  
13  
14

### 15 16 *Statistical analysis*

17  
18 For some studies, we pooled estimates of different categories of cases or controls using the method  
19 by Hamling et al.<sup>23</sup>, which allows to combine the estimates originally shown in the paper, changing  
20 the reference category, and taking into account their correlation. We obtained the summary  
21 estimates of the RR using the random-effect model (i.e., as weighed averages on the sum of the  
22 inverse of the variance of the log RR and the moment estimator of the variance between studies)<sup>24</sup>.  
23  
24 We assessed the heterogeneity among studies using the  $\chi^2$  test<sup>25</sup> and quantified it using the  $I^2$   
25 statistic, which represents the percentage of the total variation across studies that is attributable to  
26 heterogeneity rather than chance<sup>26</sup>. Results were defined as heterogeneous for P values less than  
27 0.10.  
28  
29

30  
31 We computed summary estimates for ever tobacco smokers, former smokers, current smokers,  
32 moderate current smokers, and heavy current smokers, as compared to never smokers. Different  
33 cut-points for moderate and heavy smoking were chosen, depending on those shown in the papers.  
34  
35 We also carried out a cumulative meta-analysis to determine whether the association between  
36 tobacco smoking and endometriosis changed over time. In the cumulative meta-analysis studies are  
37 added one at a time, ordered by year of publication, and the results are pooled as each new study is  
38 added. In the graph the vertical line corresponding to each year represents the RR and  
39 corresponding CI of the results of the meta-analysis of the studies published up to that year, rather  
40 than the results of a single study<sup>27</sup>. Furthermore, we performed subgroup analyses according to  
41  
42  
43  
44  
45  
46  
47  
48  
49  
50  
51  
52  
53  
54  
55  
56  
57  
58  
59  
60

1  
2  
3 type of controls (fertile, infertile, both/not specified). Publication bias was evaluated using funnel  
4 plot<sup>28</sup> and was quantified by the Egger's test<sup>29</sup>.

## 7 RESULTS

9  
10 Figure 1 shows the flow-chart of the selection of publications. The literature search yielded 1,758,  
11 1,620 of which were excluded after evaluation of abstract and full text, because did not report any  
12 information on the relationship between tobacco smoking and risk of endometriosis, and 80 because  
13 did not satisfy the inclusion criteria. Moreover, 4 studies were not comparable with the other ones,  
14 since reported estimates for lifetime smoking<sup>30</sup>, included former or light smokers in the reference  
15 category<sup>11</sup>, included women with stage I endometriosis in the comparison group<sup>31</sup>, or reported  
16 serum cotinine as measure of exposure to tobacco smoking (including passive smoking as well)<sup>32</sup>,  
17 and thus we excluded those studies from the meta-analysis.

18  
19 Furthermore, we excluded 16 studies based on the same data of other included publications<sup>33-48</sup>.

20  
21 Thus, in the present meta-analysis we combined data from 38 studies, including a total of 13,129  
22 women with endometriosis (suppl. File Table 1)<sup>3, 5-10, 12-14, 49-76</sup>.

23  
24 Table 1 shows the main characteristics of the studies included in the present meta-analysis. Most  
25 publications were based on case-control studies, while 9 were cohort studies, in which, however, the  
26 role of smoking was evaluated at the same time of the disease diagnosis<sup>13, 50, 52, 54, 58, 70, 74</sup>, except in  
27 two cases, in which smoking status was assessed at baseline<sup>5, 49</sup>. Of these, 16 studies were from  
28 Europe<sup>3, 5, 9, 10, 49, 52, 54-57, 60, 62, 66, 68, 69, 71</sup>, 13 from the USA<sup>7, 12-14, 50, 53, 58, 61, 64, 65, 67, 70, 72</sup>, 2 from  
29 Canada<sup>8, 63</sup>, 5 from Asia<sup>6, 51, 59, 74, 75</sup>, and 2 from Australia<sup>73, 76</sup>.

30  
31 Twenty-four studies reported information on ever smokers<sup>5, 7-10, 13, 14, 49, 50, 52, 54, 56, 57, 60, 61, 64, 67, 68, 71-  
32 76</sup>, 16 on former smokers<sup>5, 7-10, 13, 52, 54, 56, 57, 61, 64, 68, 71-73</sup>, and 30 on current smokers<sup>3, 5-10, 12, 13, 51-59,  
33 61-66, 68-73</sup>. Among these, 8 reported more categories of current smokers, thus we could calculate

34  
35 separate estimates for moderate and heavy current smokers. We used different cut-points for various  
36 study populations, depending on those presented in the papers: thus the cut-point between moderate  
37  
38  
39  
40  
41  
42  
43  
44  
45  
46  
47  
48  
49  
50  
51  
52  
53  
54  
55  
56  
57  
58  
59  
60

1  
2  
3 and heavy smokers were defined as 20 cigarettes per day in 5 studies<sup>5, 8, 53, 71, 72</sup>, 15 cigarettes per  
4  
5 day in 2 studies<sup>13, 58</sup> and 10 cigarettes per day in 1 study<sup>10</sup>.

6  
7 For some studies reporting separate estimates for different types of patients and/or controls, we  
8  
9 computed a pooled estimate. In particular, Coccia et al.<sup>52</sup> reported separate estimates for  
10  
11 monolateral and bilateral endometriosis, Heilier et al.<sup>57</sup> for endometriosis and deep endometriotic  
12  
13 nodules, Parazzini et al.<sup>68</sup> for deep endometriosis and pelvic and ovarian endometriosis, Signorello  
14  
15 et al.<sup>14</sup> for fertile and infertile controls, Tsuchiya et al.<sup>75</sup> for stage I/II and stage III/IV  
16  
17 endometriosis. Moreover, Calahz-Jorge et al.<sup>5</sup> reported separate estimates for grade I/II and grade  
18  
19 III/IV endometriosis, as well as for any type of endometriosis, and the Gruppo Italiano per lo Studio  
20  
21 dell'endometriosi<sup>10</sup>, including two separate groups of cases and controls undergoing laparoscopy  
22  
23 for pelvic pain or infertility, showed both separate and pooled estimate; in both cases we included in  
24  
25 the meta-analysis the combined estimates; further, Pollack et al. included an operative cohort  
26  
27 comprising women scheduled for laparoscopy/laparotomy and an aged-matched population cohort  
28  
29 of women who underwent pelvic magnetic resonance for the detection of endometriosis, and we  
30  
31 summed up the two groups<sup>70</sup>.

32  
33  
34  
35  
36  
37  
38 Considering ever smokers or separately former smokers, current smokers, moderate smokers and  
39  
40 heavy smokers, no statistically significant association emerged (Figures 2-4).

41  
42 Figure 5 shows the funnel plot for ever smokers versus non smokers. There was no evidence of  
43  
44 publication bias ( $p=0.054$ ).

45  
46  
47 When we restricted the analyses to 9 studies reporting risk estimates adjusted for confounding  
48  
49 variables, risk estimates were 1.01 (95% CI: -0.86-1.19) for ever smokers, 0.94 (95% CI: 0.85-1.03)  
50  
51 for former smokers, 0.87 (95% CI: 0.64-1.17) for current smokers, 0.85 (95% CI: 0.60-1.20) for  
52  
53 moderate current smokers, and 0.90 (95% CI: 0.57-1.43) for heavy current smokers versus never  
54  
55 smokers.  
56

1  
2  
3 In subgroup analyses according to type of controls, estimates for ever versus non smokers were 1.06  
4 (95% CI:0.89-1.27) for 7 studies including fertile women, 0.92 (95% CI: 0.75-1.12) for 7 studies  
5 including infertile women, and 0.95 (95% CI:0.81-1.12) for 14 studies including both or not  
6 specified type of controls. Moreover, when we restricted the analyses to studies with cases and  
7 controls laparoscopically or surgically confirmed, the risk estimates were 0.97 (95% CI:0.87-1.07)  
8 for ever smokers, 0.94 (95% CI: 0.85-1.03) for former smokers, 0.90 (95 % CI:0.77-1.04) for  
9 current smokers, 0.86 (95% CI: 0.66-1.12) for moderate smokers, and 0.97 (95% CI: 0.70-1.35) for  
10 heavy smokers.

11  
12 Quality score, ranged between 2 and 7 (median 4.5). When we restricted the meta-analysis to 19  
13 high quality studies (with quality score $\geq$ 5) the pooled estimates did not materially changed (data not  
14 shown).Figure 6 shows the cumulative meta-analysis of endometriosis risk for ever smokers versus  
15 non smokers over time, from 1986 to2014: small variations over time in the RR estimates emerged.  
16  
17  
18  
19

## 20 21 22 23 24 25 26 27 28 29 30 31 32 **DISCUSSION**

33  
34 The present meta-analysis does not support an association between smoking and endometriosis risk.  
35  
36 No association emerged considering subgroups of ever, former, current, moderate and heavy  
37 smokers, nor in sensitivity and subgroup analyses  
38

39  
40 However, this work may be affected by limitations and biases intrinsic in the original observational  
41 studies included in the meta-analysis, as well as to the limits that we choose to apply to the  
42 bibliographic search, including the restriction to searching PubMed only and the exclusion of  
43 languages other than English. As regards the characteristics of the observational studies, a major  
44 concern is ascertainment of the presence or absence of endometriosis. Some studies compared  
45 symptomatic cases with asymptomatic controls, and thus could not distinguish factors related to  
46 endometriosis to those associated to pelvic pain or infertility. Moreover, generally asymptomatic  
47 controls did not undergo laparoscopy nor other surgical procedures, and therefore the presence of  
48  
49  
50  
51  
52  
53  
54  
55  
56  
57  
58  
59  
60



1  
2  
3 asymptomatic endometriosis in these women cannot be ruled out. Another concern is the fact that in  
4  
5 some studies diagnosis of endometriosis was self reported. Thus, a misclassification of cases and  
6  
7 controls could not be definitively excluded. However, when we restricted the analyses to women in  
8  
9 whom laparoscopy or a surgical procedure had confirmed the presence or absence of endometriotic  
10  
11 lesions, still we did not find any significant association between smoking and endometriosis.  
12  
13  
14 Further, tobacco smoking is based on patients' self-reported information, thus some  
15  
16 misclassification may have occurred. However, information on tobacco smoking in observational  
17  
18 studies has been shown to be satisfactorily reproducible and valid <sup>77-79</sup>. For most studies included in  
19  
20 the present meta-analysis only raw estimates were available, since tobacco smoking was not the  
21  
22 main topic of the paper and it was only reported as confounding variable. However, estimates from  
23  
24 these studies were similar to those from studies specifically investigating the role of smoking, thus,  
25  
26 allowing to rule out major publication bias on this issue. Moreover, we did not find any relevant  
27  
28 asymmetry in the funnel plot, and the Egger's test was not statistically significant. Thus, publication  
29  
30 bias is unlikely to have appreciably modified the relation between tobacco smoking and  
31  
32 endometriosis. Although previous studies have reported an association between endometriosis and  
33  
34 menstrual and reproductive factors, such as early menarche <sup>7, 12</sup>, longer duration of bleeding <sup>7</sup>, intra-  
35  
36 uterine device use <sup>80</sup>, or a lifelong regular menstrual pattern of shorter cycles and heavy flows <sup>7, 12,</sup>  
37  
38 <sup>72, 81</sup>, nulliparity or low parity <sup>14, 30, 38, 82</sup>, only some studies included in the present meta-analysis  
39  
40 have accounted for the role of these factors in the estimate of the relation between tobacco smoking  
41  
42 and endometriosis. However, analyses based on adjusted estimates only were comparable to those  
43  
44 based on raw estimates.  
45  
46  
47  
48

49 Since endometriosis is an estrogen-dependent condition, the inverse association between smoking  
50  
51 and endometriosis found in some studies has generally been attributed to the antiestrogenic effect of  
52  
53 tobacco <sup>83</sup>. Some authors have suggested that estradiol might modulate the mediators of immune  
54  
55 system molecules or those involved in tissue cell adhesion and invasion <sup>84, 85</sup>. Moreover, a favorable  
56  
57  
58  
59  
60

1  
2  
3 effect of smoking has been observed in other benign and malignant estrogen-related diseases, such  
4 as endometrial cancer <sup>86</sup>, and fibroids <sup>87</sup>. The antiestrogenic effect of smoking on these conditions  
5 could support a protective effect of smoking on endometriosis. Indeed, earlier studies tended to  
6 support some inverse association, which however declined over time, and accumulating evidence  
7 suggests the presence of some false positive findings in earlier studies <sup>88</sup>. Furthermore, tobacco  
8 smoking has been associated with female infertility <sup>89</sup>, and thus the interpretation of the relation  
9 between smoking and endometriosis may be influenced by the role of infertility.

10  
11  
12  
13  
14  
15  
16  
17  
18  
19  
20  
21  
22  
23  
24  
25  
26  
27  
28  
29  
30  
31  
32  
33  
34  
35  
36  
37  
38  
39  
40  
41  
42  
43  
44  
45  
46  
47  
48  
49  
50  
51  
52  
53  
54  
55  
56  
57  
58  
59  
60

Despite the high prevalence of this condition, the epidemiology of endometriosis still needs to be elucidated, for several reasons. Endometriosis is a complex condition in which a genetic contribution and environmental factors seem to be involved <sup>90</sup>. Further, it is a disease characterized by a still poorly defined phenotype. The disease stage depends on the type (cysts, implants, nodules), location (ovary, peritoneum, bladder, ureter, etc.), appearance and depth of invasion of the lesions, that can vary greatly among patients. The clinical presentation can be so variable and the lesions of such diverse morphology that none of the pathogenetic models proposed (retrograde menstruation, coelomic metaplasia, embryological origin) can fully explain the various aspects of endometriosis, and none has been recognized as an ultimately valid explanatory model for all the different forms and manifestations of the disease <sup>90</sup>. Moreover, an invasive procedure is needed to diagnose it <sup>90,91</sup>. Furthermore, published studies differ in the case and control selection and population definition, depending on the choices to consider fertile or infertile cases, and healthy controls or patients with conditions other than endometriosis. Despite these possible sources of variation, the consistency of results observed weighs against any relevant role of tobacco on endometriosis.

In conclusion, the present meta-analysis failed to identify an association between tobacco smoking and endometriosis. However, given the possible limitations of the present study, further studies are

1  
2  
3 needed to evaluate in deep the relationship and the potential effect of smoking on different type of  
4  
5 endometriosis.  
6  
7  
8  
9  
10

11 **Acknowledgments:** The authors thank Mrs I. Garimoldi for editorial assistance.  
12

13 **Competing interests:** The authors declare they have no conflicts of interest  
14  
15

#### 16 **Contributors**

17  
18 FP conceived the idea and planned the research. FB and SC performed the statistical analysis. FB,  
19 FC, ER, VC retrieved data. FP, FB, PV and CLV wrote the entire draft of the article and all  
20 subsequent drafts after critical review by all co-authors. All co-authors gave significant input in the  
21 preparation of the article and the analysis. FP is the guarantor for the article.  
22  
23  
24

25  
26 **Data Sharing Statement:** No additional data available  
27

#### 28 **Details of ethical approval:**

29  
30 No ethical approval was needed for this review.  
31  
32

33 **Funding:** none.  
34  
35  
36  
37  
38  
39  
40  
41  
42  
43  
44  
45  
46  
47  
48  
49  
50  
51  
52  
53  
54  
55  
56  
57  
58  
59  
60

**FIGURE LEGENDS**

**Figure 1** – Flow chart of the selection of studies on tobacco smoking and risk of endometriosis included in the meta-analysis.

**Figure 2** – Study-specific and summary relative risks (RR) of endometriosis for ever smokers versus non smokers.

CI: confidence interval.

**Figure 3** – Study-specific and summary relative risks (RR) of endometriosis for current (A) and former smokers (B) versus non smokers.

CI: confidence interval.

**Figure 4** – Study-specific and summary relative risks (RR) of endometriosis for moderate (A) and heavy (B) current smokers versus non smokers.

CI: confidence interval.

**Figure 5** – Funnel-plot of studies on tobacco smoking and risk of endometriosis.

RR: relative risk for ever smokers versus non smokers; CI: confidence interval; s.e.: standard error.

**Figure 6** - Cumulative meta-analysis of studies on tobacco smoking and risk of endometriosis.

RR: relative risk for ever smokers versus non smokers; CI: confidence interval.

## REFERENCES

1. Donnez J, Van Langendonck A, Casanas-Roux F, Van Gossum JP, Pirard C, Jadoul P, et al. Current thinking on the pathogenesis of endometriosis. *Gynecol Obstet Invest* 2002;54 Suppl 1:52-8; discussion 59-62.
2. Moen MH, Muus KM. Endometriosis in pregnant and non-pregnant women at tubal sterilization. *Hum Reprod* 1991;6(5):699-702.
3. Matorras R, Rodriguez F, Pijoan JI, Ramon O, Gutierrez de Teran G, Rodriguez-Escudero F. Epidemiology of endometriosis in infertile women. *Fertil Steril* 1995;63(1):34-8.
4. Gruppo italiano per lo studio dell'endometriosi. Prevalence and anatomical distribution of endometriosis in women with selected gynaecological conditions: results from a multicentric Italian study. *Hum Reprod* 1994;9(6):1158-62.
5. Calhaz-Jorge C, Mol BW, Nunes J, Costa AP. Clinical predictive factors for endometriosis in a Portuguese infertile population. *Hum Reprod* 2004;19(9):2126-31.
6. Aban M, Ertunc D, Tok EC, Tamer L, Arslan M, Dilek S. Modulating interaction of glutathione-S-transferase polymorphisms with smoking in endometriosis. *J Reprod Med* 2007;52(8):715-21.
7. Cramer DW, Wilson E, Stillman RJ, Berger MJ, Belisle S, Schiff I, et al. The relation of endometriosis to menstrual characteristics, smoking, and exercise. *JAMA* 1986;255(14):1904-8.
8. Berube S, Marcoux S, Maheux R. Characteristics related to the prevalence of minimal or mild endometriosis in infertile women. Canadian Collaborative Group on Endometriosis. *Epidemiology* 1998;9(5):504-10.
9. Chapron C, Souza C, de Ziegler D, Lafay-Pillet MC, Ngo C, Bijaoui G, et al. Smoking habits of 411 women with histologically proven endometriosis and 567 unaffected women. *Fertil Steril* 2010;94(6):2353-5.
10. Gruppo Italiano per lo Studio dell'endometriosi. Risk factors for pelvic endometriosis in women with pelvic pain or infertility. Gruppo Italiano per lo Studio dell' endometriosi. *Eur J Obstet Gynecol Reprod Biol* 1999;83(2):195-9.
11. Hemmings R, Rivard M, Olive DL, Poliquin-Fleury J, Gagne D, Hugo P, et al. Evaluation of risk factors associated with endometriosis. *Fertil Steril* 2004;81(6):1513-21.

12. Matalliotakis IM, Cakmak H, Fragouli YG, Goumenou AG, Mahutte NG, Arici A. Epidemiological characteristics in women with and without endometriosis in the Yale series. *Arch Gynecol Obstet* 2008;277(5):389-93.
13. Missmer SA, Hankinson SE, Spiegelman D, Barbieri RL, Marshall LM, Hunter DJ. Incidence of laparoscopically confirmed endometriosis by demographic, anthropometric, and lifestyle factors. *Am J Epidemiol* 2004;160(8):784-96.
14. Signorello LB, Harlow BL, Cramer DW, Spiegelman D, Hill JA. Epidemiologic determinants of endometriosis: a hospital-based case-control study. *Ann Epidemiol* 1997;7(4):267-741.
15. Sanders SR, Cuneo SP, Turzillo AM. Effects of nicotine and cotinine on bovine theca interna and granulosa cells. *Reprod Toxicol* 2002;16(6):795-800.
16. Vidal JD, VandeVoort CA, Marcus CB, Lazarewicz NR, Conley AJ. In vitro exposure to environmental tobacco smoke induces CYP1B1 expression in human luteinized granulosa cells. *Reprod Toxicol* 2006;22(4):731-7.
17. Miceli F, Minici F, Tropea A, Catino S, Orlando M, Lamanna G, et al. Effects of nicotine on human luteal cells in vitro: a possible role on reproductive outcome for smoking women. *Biol Reprod* 2005;72(3):628-32.
18. Paksy K, Rajczy K, Forgacs Z, Lazar P, Bernard A, Gati I, et al. Effect of cadmium on morphology and steroidogenesis of cultured human ovarian granulosa cells. *J Appl Toxicol* 1997;17(5):321-7.
19. Piasek M, Laskey JW. Acute cadmium exposure and ovarian steroidogenesis in cycling and pregnant rats. *Reprod Toxicol* 1994;8(6):495-507.
20. Goncalves RB, Coletta RD, Silverio KG, Benevides L, Casati MZ, da Silva JS, et al. Impact of smoking on inflammation: overview of molecular mechanisms. *Inflamm Res* 2011;60(5):409-24.
21. Stroup DF, Berlin JA, Morton SC, Olkin I, Williamson GD, Rennie D, et al. Meta-analysis of observational studies in epidemiology: a proposal for reporting. Meta-analysis Of Observational Studies in Epidemiology (MOOSE) group. *JAMA* 2000;283(15):2008-12.
22. Ottawa Hospital Research Institute. The Newcastle-Ottawa Scale (NOS) for assessing the quality of nonrandomised studies in meta-analyses.
23. Hamling J, Lee P, Weitkunat R, Ambuhl M. Facilitating meta-analyses by deriving relative effect and precision estimates for alternative comparisons from a set of estimates presented by exposure level or disease category. *Stat Med* 2008;27(7):954-70.
24. DerSimonian R, Laird N. Meta-analysis in clinical trials. *Control Clin Trials* 1986;7(3):177-88.

- 1  
2  
3 25. Greenland S. Quantitative methods in the review of epidemiologic literature. *Epidemiol Rev*  
4 1987;9:1-30.  
5  
6 26. Higgins JP, Thompson SG. Quantifying heterogeneity in a meta-analysis. *Stat Med*  
7 2002;21(11):1539-58.  
8  
9 27. Lau J, Antman EM, Jimenez-Silva J, Kupelnick B, Mosteller F, Chalmers TC. Cumulative  
10 meta-analysis of therapeutic trials for myocardial infarction. *N Engl J Med* 1992;327(4):248-  
11 54.  
12  
13 28. Thornton A, Lee P. Publication bias in meta-analysis: its causes and consequences. *J Clin*  
14 *Epidemiol* 2000;53(2):207-16.  
15  
16 29. Egger M, Davey Smith G, Schneider M, Minder C. Bias in meta-analysis detected by a simple,  
17 graphical test. *BMJ* 1997;315(7109):629-34.  
18  
19 30. Darrow SL, Vena JE, Batt RE, Zielezny MA, Michalek AM, Selman S. Menstrual cycle  
20 characteristics and the risk of endometriosis. *Epidemiology* 1993;4(2):135-42.  
21  
22 31. Itoh H, Iwasaki M, Hanaoka T, Sasaki H, Tanaka T, Tsugane S. Urinary phthalate monoesters  
23 and endometriosis in infertile Japanese women. *Sci Total Environ* 2009;408(1):37-42.  
24  
25 32. Buck Louis GM, Chen Z, Peterson CM, Hediger ML, Croughan MS, Sundaram R, et al.  
26 Persistent lipophilic environmental chemicals and endometriosis: the ENDO Study. *Environ*  
27 *Health Perspect* 2012;120(6):811-6.  
28  
29 33. Beral V, Rolfs R, Joesoef MR, Aral S, Cramer DW. Primary infertility: characteristics of  
30 women in North America according to pathological findings. *J Epidemiol Community*  
31 *Health* 1994;48(6):576-9.  
32  
33 34. Cooney MA, Buck Louis GM, Hediger ML, Vexler A, Kostyniak PJ. Organochlorine pesticides  
34 and endometriosis. *Reprod Toxicol* 2010;30(3):365-9.  
35  
36 35. Ferrero S, Pretta S, Bertoldi S, Anserini P, Remorgida V, Del Sette M, et al. Increased  
37 frequency of migraine among women with endometriosis. *Hum Reprod* 2004;19(12):2927-  
38 32.  
39  
40 36. Louis GM, Weiner JM, Whitcomb BW, Sperrazza R, Schisterman EF, Lobdell DT, et al.  
41 Environmental PCB exposure and risk of endometriosis. *Hum Reprod* 2005;20(1):279-85.  
42  
43 37. Gagne D, Rivard M, Page M, Shazand K, Hugo P, Gosselin D. Blood leukocyte subsets are  
44 modulated in patients with endometriosis. *Fertil Steril* 2003;80(1):43-53.  
45  
46 38. Grodstein F, Goldman MB, Cramer DW. Infertility in women and moderate alcohol use. *Am J*  
47 *Public Health* 1994;84(9):1429-32.  
48  
49  
50  
51  
52  
53  
54  
55  
56  
57  
58  
59  
60



- 1  
2  
3 39. Grodstein F, Goldman MB, Ryan L, Cramer DW. Relation of female infertility to consumption  
4 of caffeinated beverages. *Am J Epidemiol* 1993;137(12):1353-60.  
5  
6 40. Heilier JF, Verougstraete V, Nackers F, Tonglet R, Donnez J, Lison D. Assessment of cadmium  
7 impregnation in women suffering from endometriosis: a preliminary study. *Toxicol Lett*  
8 2004;154(1-2):89-93.  
9  
10 41. Marino JL, Holt VL, Chen C, Davis S. Shift work, hCLOCK T3111C polymorphism, and  
11 endometriosis risk. *Epidemiology* 2008;19(3):477-84.  
12  
13 42. Nagle CM, Bell TA, Purdie DM, Treloar SA, Olsen CM, Grover S, et al. Relative weight at  
14 ages 10 and 16 years and risk of endometriosis: a case-control analysis. *Hum Reprod*  
15 2009;24(6):1501-6.  
16  
17 43. Phipps WR, Cramer DW, Schiff I, Belisle S, Stillman R, Albrecht B, et al. The association  
18 between smoking and female infertility as influenced by cause of the infertility. *Fertil Steril*  
19 1987;48(3):377-82.  
20  
21 44. Trabert B, De Roos AJ, Schwartz SM, Peters U, Scholes D, Barr DB, et al. Non-dioxin-like  
22 polychlorinated biphenyls and risk of endometriosis. *Environ Health Perspect*  
23 2010;118(9):1280-5.  
24  
25 45. Tsuchiya M, Tsukino H, Iwasaki M, Sasaki H, Tanaka T, Katoh T, et al. Interaction between  
26 cytochrome P450 gene polymorphisms and serum organochlorine TEQ levels in the risk of  
27 endometriosis. *Mol Hum Reprod* 2007;13(6):399-404.  
28  
29 46. Tsukino H, Hanaoka T, Sasaki H, Motoyama H, Hiroshima M, Tanaka T, et al. Associations  
30 between serum levels of selected organochlorine compounds and endometriosis in infertile  
31 Japanese women. *Environ Res* 2005;99(1):118-25.  
32  
33 47. Upson K, De Roos AJ, Thompson ML, Sathyanarayana S, Scholes D, Barr DB, et al.  
34 Organochlorine pesticides and risk of endometriosis: findings from a population-based case-  
35 control study. *Environ Health Perspect* 2013;121(11-12):1319-24.  
36  
37 48. Louis GM, Peterson CM, Chen Z, Hediger ML, Croughan MS, Sundaram R, et al.  
38 Perfluorochemicals and endometriosis: the ENDO study. *Epidemiology* 2012;23(6):799-805.  
39  
40 49. Andolf E, Thorsell M, Kallen K. Caesarean section and risk for endometriosis: a prospective  
41 cohort study of Swedish registries. *BJOG* 2013;120(9):1061-5.  
42  
43 50. Buck Louis GM, Hediger ML, Pena JB. Intrauterine exposures and risk of endometriosis. *Hum*  
44 *Reprod* 2007;22(12):3232-6.  
45  
46 51. Cayan F, Ertunc D, Aras-Ates N, Ayaz L, Akbay E, Karakas S, et al. Association of G1057D  
47 variant of insulin receptor substrate-2 with endometriosis. *Fertil Steril* 2010;94(5):1622-6.  
48  
49  
50  
51  
52  
53  
54  
55  
56  
57  
58  
59  
60



- 1  
2  
3 52. Coccia ME, Rizzello F, Mariani G, Bulletti C, Palagiano A, Scarselli G. Ovarian surgery for  
4 bilateral endometriomas influences age at menopause. *Hum Reprod* 2011;26(11):3000-7.  
5  
6 53. Dhillon PK, Holt VL. Recreational physical activity and endometrioma risk. *Am J Epidemiol*  
7 2003;158(2):156-64.  
8  
9 54. Eskenazi B, Mocarelli P, Warner M, Samuels S, Vercellini P, Olive D, et al. Serum dioxin  
10 concentrations and endometriosis: a cohort study in Seveso, Italy. *Environ Health Perspect*  
11 2002;110(7):629-34.  
12  
13 55. Falconer H, Sundqvist J, Xu H, Vodolazkaia A, Fassbender A, Kyama C, et al. Analysis of  
14 common variations in tumor-suppressor genes on chr1p36 among Caucasian women with  
15 endometriosis. *Gynecol Oncol* 2012;127(2):398-402.  
16  
17 56. Ferrero S, Petrera P, Colombo BM, Navaratnarajah R, Parisi M, Anserini P, et al. Asthma in  
18 women with endometriosis. *Hum Reprod* 2005;20(12):3514-7.  
19  
20 57. Heilier JF, Donnez J, Nackers F, Rousseau R, Verougstraete V, Rosenkranz K, et al.  
21 Environmental and host-associated risk factors in endometriosis and deep endometriotic  
22 nodules: a matched case-control study. *Environ Res* 2007;103(1):121-9.  
23  
24 58. Hoffman CS, Small CM, Blanck HM, Tolbert P, Rubin C, Marcus M. Endometriosis among  
25 women exposed to polybrominated biphenyls. *Ann Epidemiol* 2007;17(7):503-10.  
26  
27 59. Huang PC, Tsai EM, Li WF, Liao PC, Chung MC, Wang YH, et al. Association between  
28 phthalate exposure and glutathione S-transferase M1 polymorphism in adenomyosis,  
29 leiomyoma and endometriosis. *Hum Reprod* 2010;25(4):986-94.  
30  
31 60. Huber A, Keck CC, Hefler LA, Schneeberger C, Huber JC, Bentz EK, et al. Ten estrogen-  
32 related polymorphisms and endometriosis: a study of multiple gene-gene interactions.  
33 *Obstet Gynecol* 2005;106(5 Pt 1):1025-31.  
34  
35 61. Jackson LW, Zullo MD, Goldberg JM. The association between heavy metals, endometriosis  
36 and uterine myomas among premenopausal women: National Health and Nutrition  
37 Examination Survey 1999-2002. *Hum Reprod* 2008;23(3):679-87.  
38  
39 62. Kortelahti M, Anttila MA, Hippelainen MI, Heinonen ST. Obstetric outcome in women with  
40 endometriosis--a matched case-control study. *Gynecol Obstet Invest* 2003;56(4):207-12.  
41  
42 63. Lebel G, Dodin S, Ayotte P, Marcoux S, Ferron LA, Dewailly E. Organochlorine exposure and  
43 the risk of endometriosis. *Fertil Steril* 1998;69(2):221-8.  
44  
45 64. Marino JL, Holt VL, Chen C, Davis S. Lifetime occupational history and risk of endometriosis.  
46 *Scand J Work Environ Health* 2009;35(3):233-40.  
47  
48  
49  
50  
51  
52  
53  
54  
55  
56  
57  
58  
59  
60

- 1  
2  
3 65. McCarty CA, Berg RL, Welter JD, Kitchner TE, Kemnitz JW. A novel gene-environment  
4 interaction involved in endometriosis. *Int J Gynaecol Obstet* 2012;116(1):61-3.  
5  
6 66. Moen MH, Schei B. Epidemiology of endometriosis in a Norwegian county. *Acta Obstet*  
7 *Gynecol Scand* 1997;76(6):559-62.  
8  
9 67. Niskar AS, Needham LL, Rubin C, Turner WE, Martin CA, Patterson DG, Jr., et al. Serum  
10 dioxins, polychlorinated biphenyls, and endometriosis: a case-control study in Atlanta.  
11 *Chemosphere* 2009;74(7):944-9.  
12  
13 68. Parazzini F, Cipriani S, Bianchi S, Gotsch F, Zanconato G, Fedele L. Risk factors for deep  
14 endometriosis: a comparison with pelvic and ovarian endometriosis. *Fertil Steril*  
15 2008;90(1):174-9.  
16  
17 69. Pauwels A, Schepens PJ, D'Hooghe T, Delbeke L, Dhont M, Brouwer A, et al. The risk of  
18 endometriosis and exposure to dioxins and polychlorinated biphenyls: a case-control study  
19 of infertile women. *Hum Reprod* 2001;16(10):2050-5.  
20  
21 70. Pollack AZ, Louis GM, Chen Z, Peterson CM, Sundaram R, Croughan MS, et al. Trace  
22 elements and endometriosis: the ENDO study. *Reprod Toxicol* 2013;42:41-8.  
23  
24 71. Porpora MG, Medda E, Abballe A, Bolli S, De Angelis I, di Domenico A, et al. Endometriosis  
25 and organochlorinated environmental pollutants: a case-control study on Italian women of  
26 reproductive age. *Environ Health Perspect* 2009;117(7):1070-5.  
27  
28 72. Sangi-Haghpeykar H, Poindexter AN, 3rd. Epidemiology of endometriosis among parous  
29 women. *Obstet Gynecol* 1995;85(6):983-92.  
30  
31 73. Treloar SA, Bell TA, Nagle CM, Purdie DM, Green AC. Early menstrual characteristics  
32 associated with subsequent diagnosis of endometriosis. *Am J Obstet Gynecol*  
33 2010;202(6):534 e1-6.  
34  
35 74. Tsai CW, Ho CY, Shih LC, Ying TH, Hsieh YH, Chen YC, et al. The joint effect of hOGG1  
36 genotype and smoking habit on endometriosis in Taiwan. *Chin J Physiol* 2013;56(5):263-8.  
37  
38 75. Tsuchiya M, Miura T, Hanaoka T, Iwasaki M, Sasaki H, Tanaka T, et al. Effect of soy  
39 isoflavones on endometriosis: interaction with estrogen receptor 2 gene polymorphism.  
40 *Epidemiology* 2007;18(3):402-8.  
41  
42 76. Tu FF, Du H, Goldstein GP, Beaumont JL, Zhou Y, Brown WJ. The influence of prior oral  
43 contraceptive use on risk of endometriosis is conditional on parity. *Fertil Steril*  
44 2014;101(6):1697-704.  
45  
46  
47  
48  
49  
50  
51  
52  
53  
54  
55  
56  
57  
58  
59  
60

- 1  
2  
3 77. D' Avanzo B, La Vecchia C, Katsouyanni K, Negri E, Trichopoulos D. Reliability of  
4 information on cigarette smoking and beverage consumption provided by hospital controls.  
5 *Epidemiology* 1996;7(3):312-5.  
6  
7  
8 78. Lee MM, Whittemore AS, Lung DL. Reliability of recalled physical activity, cigarette smoking,  
9 and alcohol consumption. *Ann Epidemiol* 1992;2(5):705-14.  
10  
11 79. Patrick DL, Cheadle A, Thompson DC, Diehr P, Koepsell T, Kinne S. The validity of self-  
12 reported smoking: a review and meta-analysis. *Am J Public Health* 1994;84(7):1086-93.  
13  
14 80. Kirshon B, Poindexter AN, 3rd. Contraception: a risk factor for endometriosis. *Obstet Gynecol*  
15 1988;71(6 Pt 1):829-31.  
16  
17 81. Parazzini F, Ferraroni M, Fedele L, Bocciolone L, Rubessa S, Riccardi A. Pelvic endometriosis:  
18 reproductive and menstrual risk factors at different stages in Lombardy, northern Italy. *J*  
19 *Epidemiol Community Health* 1995;49(1):61-4.  
20  
21 82. Candiani GB, Danesino V, Gastaldi A, Parazzini F, Ferraroni M. Reproductive and menstrual  
22 factors and risk of peritoneal and ovarian endometriosis. *Fertil Steril* 1991;56(2):230-4.  
23  
24 83. Baron JA, La Vecchia C, Levi F. The antiestrogenic effect of cigarette smoking in women. *Am J*  
25 *Obstet Gynecol* 1990;162(2):502-14.  
26  
27 84. Boucher A, Mourad W, Mailloux J, Lemay A, Akoum A. Ovarian hormones modulate  
28 monocyte chemotactic protein-1 expression in endometrial cells of women with  
29 endometriosis. *Mol Hum Reprod* 2000;6(7):618-26.  
30  
31 85. Osteen KG, Bruner KL, Sharpe-Timms KL. Steroid and growth factor regulation of matrix  
32 metalloproteinase expression and endometriosis. *Semin Reprod Endocrinol* 1996;14(3):247-  
33 55.  
34  
35 86. Parazzini F, La Vecchia C, Bocciolone L, Franceschi S. The epidemiology of endometrial  
36 cancer. *Gynecol Oncol* 1991;41(1):1-16.  
37  
38 87. Parazzini F, Negri E, La Vecchia C, Rabaiotti M, Luchini L, Villa A, et al. Uterine myomas and  
39 smoking. Results from an Italian study. *J Reprod Med* 1996;41(5):316-20.  
40  
41 88. Boffetta P, McLaughlin JK, La Vecchia C, Tarone RE, Lipworth L, Blot WJ. False-positive  
42 results in cancer epidemiology: a plea for epistemological modesty. *J Natl Cancer Inst*  
43 2008;100(14):988-95.  
44  
45 89. Practice Committee of the American Society for Reproductive Medicine. Smoking and  
46 infertility: a committee opinion. *Fertil Steril* 2012;98(6):1400-6.  
47  
48 90. Viganò P, Somigliana E, Panina P, Rabellotti E, Vercellini P, Candiani M. Principles of  
49 phenomics in endometriosis. *Hum Reprod Update* 2012;18(3):248-59.  
50  
51  
52  
53  
54  
55  
56  
57  
58  
59  
60

1  
2  
3  
4  
5  
6  
7  
8  
9  
10  
11  
12  
13  
14  
15  
16  
17  
18  
19  
20  
21  
22  
23  
24  
25  
26  
27  
28  
29  
30  
31  
32  
33  
34  
35  
36  
37  
38  
39  
40  
41  
42  
43  
44  
45  
46  
47  
48  
49  
50  
51  
52  
53  
54  
55  
56  
57  
58  
59  
60

91. Gentilini D, Perino A, Vigano P, Chiodo I, Cucinella G, Vignali M, et al. Gene expression profiling of peripheral blood mononuclear cells in endometriosis identifies genes altered in non-gynaecologic chronic inflammatory diseases. *Hum Reprod* 2011;26(11):3109-17.

For peer review only

## Tobacco smoking and risk of endometriosis: a systematic review and meta-analysis

Francesca Bravi (1), Fabio Parazzini (1,2), Sonia Cipriani (1,2), Francesca Chiaffarino (2), Elena Ricci (2), Vito Chiantera (3), Paola Viganò (4), Carlo La Vecchia (1)

(1) Department of Clinical Sciences and Community Health, University of Milan, via Commenda, 12, 20122 Milan, Italy

(2) Department of Obstetrics, Gynecology and Neonatology, IRCSS Fondazione Ca' Granda, Ospedale Maggiore Policlinico, Via Francesco Sforza, 28, 20122 Milano, Italy

(3) Department of Gynecology, Charité Universitätsmedizin, Charitestraße 1, 10117 Berlin, Germany.

(4) Obstetrics and Gynecology Unit, San Raffaele Scientific Institute, Via Olgettina, 60, 20132 Milan, Italy

**Short title:** Tobacco smoking and endometriosis.

**Keywords:** endometriosis; tobacco smoking; meta-analysis.

**Word count:** 2400 - excluding title page, abstract, references, figures and tables.

**Corresponding author:**

Fabio Parazzini

Dipartimento di Scienze Cliniche e di Comunità, Università di Milano, Fondazione IRCCS Ca' Granda Ospedale Maggiore Policlinico, Via Commenda 12, 20122 Milano, Italy. Tel.: +39 02 55032318; fax: +39 02 550320252.

E-mail address: Fabio.Parazzini@unimi.it

**Abbreviations:** CI: confidence interval, HR: hazard ratio, MOOSE: meta-analysis of observational studies in epidemiology, OR: odds ratio, RR: relative risk.

## ABSTRACT

**Objective:** Since conflicting results have been published on the role of tobacco smoking on the risk of endometriosis, we provide an up to date summary quantification of this potential association.

**Design:** We performed a PubMed/MEDLINE search of the relevant publications up to ~~May 2012~~ September 2014, considering studies on humans published in English. We searched the reference list of the identified papers to identify other relevant publications. Both case-control or cohort studies have been included reporting risk estimates on the association between tobacco smoking and endometriosis. Thirty-~~three~~eight out of the ~~1,534~~1,758 screened papers met the inclusion criteria. The selected studies included a total of ~~8,225~~13,129 women diagnosed with endometriosis.

**Setting:** Academic hospitals

**Main outcome measures:** Risk of endometriosis in tobacco smokers.

**Results:** We obtained the summary estimates of the relative risk (RR) using the random-effect model, and assessed the heterogeneity among studies using the  $\chi^2$  test and quantified it using the  $I^2$  statistic. As compared to never smokers, the summary RR were ~~0.97~~0.96 (95% confidence interval, CI: ~~0.86-1.09~~0.86-1.08) for ever smokers, ~~0.95~~0.93 (95% CI: ~~0.81-1.11~~0.77-1.12) for former smokers, 0.94 (95% CI: ~~0.83-1.06~~0.81-1.10) for current smokers, 0.87 (95% CI: 0.70-1.07) for moderate smokers, and 0.93 (95% CI: 0.69-1.26) for heavy smokers.

**Conclusions:** The present meta-analysis provided no evidence for an association between tobacco smoking and the risk of endometriosis. The results were consistent considering ever, former, current, moderate, and heavy smokers, and across type of endometriosis and study design.

### Strengths and limitations of the study

- Meta-analysis including ~~33~~38 papers without any relevant asymmetry in the funnel plot.
- The Egger's test was not statistically significant.
- In some studies, choice of the cases as asymptomatic without distinguishing factors related to endometriosis to those associated to pelvic pain or infertility.
- In some studies, choice of controls in whom disease was not laparoscopically ruled out.
- Tobacco smoking based on patients' self-reported information.

## INTRODUCTION

Endometriosis is an estrogen-dependent, chronic inflammatory gynecological condition characterized by the proliferation of functional endometrial tissue that develops outside the uterine cavity, which may cause pain and infertility<sup>1</sup>. However, despite its relatively high prevalence, which spans from 20% in asymptomatic women<sup>2</sup>, to 30% in women with infertility<sup>3</sup>, and 45% in women with pain symptoms<sup>4</sup>, risk factors for this condition remain largely unknown.

Among the risk factors investigated, some studies have examined the role of tobacco smoking. In a Portuguese study investigating clinical and lifestyle factors in infertile women, current smokers had a decreased risk of endometriosis as compared to non-smokers or former smokers<sup>5</sup>. In a case-control study from Turkey evaluating the interaction between tobacco smoking and glutathione-S-transferase gene polymorphism as a risk factor for endometriosis, an inverse association between smoking and endometriosis was observed<sup>6</sup>. In a case-control study carried out in the USA, infertile women with endometriosis and fertile controls were compared and a decreased risk of endometriosis was found, though limited to women who begun smoking at an early age and were heavy smokers<sup>7</sup>. Other studies did not find significant association<sup>3, 8-14</sup>.

The biological plausibility potentially linking smoking and endometriosis resides in its endocrine and inflammatory mechanisms. Smoke compounds disrupt steroidogenesis, leading to impairment of E2 synthesis<sup>15, 16</sup> and progesterone synthesis deficiency<sup>17-19</sup>. Moreover, smoking has a strong effect on inflammatory mediators in both the pulmonary and extra-pulmonary environments and can further trigger inflammation associated with the disease resulting in pro-inflammatory gene overexpression<sup>20</sup>.

A clear definition of the relation between smoking and endometriosis risk has an interest in order to better understand the role of estrogens, in consideration of the potential anti estrogenic effect of smoking. Otherwise in clinical term, a direct association as reported in some studies<sup>6, 7</sup> may suggest preventive measures.



1  
2  
3 Thus, in order to investigate the possible relation between tobacco smoking and endometriosis, and  
4  
5 to provide an overall quantitative estimate of any such relation, we combined in a meta-analysis all  
6  
7 published data on the issue.  
8  
9

## 10 11 12 **MATERIALS AND METHODS**

### 13 14 *Search strategy*

15  
16 We performed a PubMed/MEDLINE search of papers published between 1966 and ~~May 2012~~  
17  
18 September 2014, using the terms “tobacco” or “smoking” or “cigarette” in combination with “risk  
19  
20 factor”, or “epidemiology”, and “endometriosis”, following the MOOSE (Meta-analysis of  
21  
22 Observational Studies in Epidemiology) guidelines <sup>21</sup>; details on the search terms are provided in  
23  
24 Appendix. We selected only studies on humans, published as full-length papers in English. No  
25  
26 effort was made to identify papers published in other languages or unpublished studies. Moreover,  
27  
28 we reviewed the reference lists of the retrieved papers, to identify any other relevant publication.  
29  
30 Studies were included in the meta-analysis if: a) they were based on case-control or cohort studies,  
31  
32 reporting original data; b) they reported information on the association between tobacco smoking  
33  
34 and endometriosis, including estimates of the relative risk (RR) (approximated by the odds ratio,  
35  
36 OR, in case-control studies) or the odds ratio (OR) or the hazard ratio (HR), with the corresponding  
37  
38 95% confidence intervals (CI), or frequency distribution to calculate them; c) diagnosis of  
39  
40 endometriosis was histologically confirmed and/or clinically based. When we found more than one  
41  
42 publication based on the same study population and data, we included only the one with most  
43  
44 detailed information, or published most recently.  
45  
46  
47

48  
49 We used the Newcastle-Ottawa Scale <sup>22</sup> to assess the quality of individual studies and performed a  
50  
51 sensitivity analysis according to the quality of each study.  
52  
53

### 54 *Data extraction for the meta-analysis*

1  
2  
3 Two authors (FB and SC) reviewed the manuscripts and independently selected the eligible  
4 manuscripts; disagreements were resolved by discussion. From each publication we extracted the  
5  
6 following information: country of origin; study design; number and characteristics of subjects  
7  
8 (cases, controls or cohort size); age, if available; categories of tobacco smoking, if available;  
9  
10 measures of association (RR, or OR ~~or HR~~) of endometriosis and corresponding 95% CI for every  
11  
12 category of tobacco smoking, or frequency distribution to calculate them; confounding variables  
13  
14 allowed for in the statistical analysis, if any. When more than one regression model was provided,  
15  
16 estimates adjusted for the largest number of confounding variables were considered.  
17  
18  
19

### 20 *Statistical analysis*

21  
22 For some studies, we pooled estimates of different categories of cases or controls using the method  
23  
24 by Hamling et al.<sup>23</sup>, which allows to combine the estimates originally shown in the paper, changing  
25 the reference category, and thus taking into account their correlation. We obtained the summary  
26  
27 estimates of the RR using the random-effect model (i.e., as weighed averages on the sum of the  
28  
29 inverse of the variance of the log RR and the moment estimator of the variance between studies)<sup>24</sup>.  
30  
31 We assessed the heterogeneity among studies using the  $\chi^2$  test<sup>25</sup> and quantified it using the  $I^2$   
32  
33 statistic, which represents the percentage of the total variation across studies that is attributable to  
34  
35 heterogeneity rather than chance<sup>26</sup>. Results were defined as heterogeneous for P values less than  
36  
37 0.10.  
38  
39

40  
41 We computed summary estimates for ever tobacco smokers, former smokers, current smokers,  
42  
43 moderate current smokers, and heavy current smokers, as compared to never smokers. Different  
44  
45 cut-points for moderate and heavy smoking were chosen, depending on those shown in the papers.  
46  
47  
48

49 We also carried out a cumulative meta-analysis to determine whether the association between  
50  
51 tobacco smoking and endometriosis changed over time. In the cumulative meta-analysis studies are  
52 added one at a time, ordered by year of publication, and the results are pooled as each new study is  
53 added. In the graph the vertical line corresponding to each year represents the RR and  
54  
55  
56  
57

corresponding CI of the results of the meta-analysis of the studies published up to that year, rather than the results of a single study<sup>27</sup>. ~~and performed~~ Furthermore, we performed subgroup analyses according to type of controls (fertile, infertile, both/not specified). Publication bias was evaluated using funnel plot<sup>28</sup> and was quantified by the Egger's test<sup>29</sup>.

## RESULTS

Figure 1 shows the flow-chart of the selection of publications. ~~From the~~ The literature search ~~we identified-yielded 1,7581534 studies, 1448-1,620~~ of which were excluded ~~because not relevant after evaluation of abstract and full text, because did not report any information on the relationship between tobacco smoking and risk of endometriosis,~~ and 4080 because did not satisfy the inclusion criteria. Moreover, 34 studies were not comparable with the other ones, since reported estimates for lifetime smoking<sup>30</sup>, included former or light smokers in the reference category<sup>11</sup>, ~~or~~ included women with stage I endometriosis in the comparison group<sup>31</sup>, ~~or reported serum cotinine as measure of exposure to tobacco smoking (including passive smoking as well)~~<sup>32</sup>, and thus we excluded those studies from the meta-analysis.

Furthermore, we excluded 1416 studies based on the same data of other included publications<sup>33-48</sup>. Thus, in the present meta-analysis we combined data from 3338 studies, including a total of 822513,129 women with endometriosis (suppl. File Table 1)<sup>3, 5-10, 12-14, 49-76</sup>.

Table 1 shows the main characteristics of the studies included in the present meta-analysis. Most publications were based on case-control studies, while ~~six~~9 were cohort studies, in which, however, the role of smoking was ~~not~~ evaluated ~~prospectively at the same time of the disease diagnosis~~<sup>13, 50, 52, 54, 58, 70, 74</sup>, except in ~~one two~~ cases, in which smoking status was assessed at baseline<sup>5, 49</sup>. Of these, 1416 studies were from Europe<sup>3, 5, 9, 10, 49, 52, 54-57, 60, 62, 66, 68, 69, 71</sup>, 1213 from the USA<sup>7, 12-14, 50, 53, 58, 61, 64, 65, 67, 70, 72</sup>, 2 from Canada<sup>8, 63</sup>, 45 from Asia<sup>6, 51, 59, 74, 75</sup>, and 12 from Australia<sup>73, 76</sup>.

1  
2  
3 Twenty ~~one-four~~ studies reported information on ever smokers<sup>5, 7-10, 13, 14, 49, 50, 52, 54, 56, 57, 60, 61, 64, 67,</sup>  
4  
5 68, 71-76<sup>,</sup> 16 on former smokers<sup>5, 7-10, 13, 52, 54, 56, 57, 61, 64, 68, 71-73</sup>, and ~~2830~~ on current smokers<sup>3, 5-10, 12,</sup>  
6  
7 13, 51-59, 61-66, 68-73<sup>.</sup> Among these, 8 reported more categories of current smokers, thus we could

8  
9 calculate separate estimates for moderate and heavy current smokers. We used different cut-points  
10 for various study populations, depending on those presented in the papers: thus the cut-point  
11 between moderate and heavy smokers were defined as 20 cigarettes per day in 5 studies<sup>5, 8, 53, 71, 72</sup>,  
12  
13 15 cigarettes per day in 2 studies<sup>13, 58</sup> and 10 cigarettes per day in 1 study<sup>10</sup>.

14 For some studies reporting separate estimates for different types of patients and/or controls, we  
15 computed a pooled estimate. In particular, Coccia et al.<sup>52</sup> reported separate estimates for  
16  
17 monolateral and bilateral endometriosis, Heilier et al.<sup>57</sup> for endometriosis and deep endometriotic  
18  
19 nodules, Parazzini et al.<sup>68</sup> for deep endometriosis and pelvic and ovarian endometriosis, Signorello  
20  
21 et al.<sup>14</sup> for fertile and infertile controls, Tsuchiya et al.<sup>75</sup> for stage I/II and stage III/IV  
22  
23 endometriosis. Moreover, Calahz-Jorge et al.<sup>5</sup> reported separate estimates for grade I/II and grade  
24  
25 III/IV endometriosis, as well as for any type of endometriosis, and the Gruppo Italiano per lo Studio  
26  
27 dell'endometriosi<sup>10</sup>, including two separate groups of cases and controls undergoing laparoscopy  
28  
29 for pelvic pain or infertility, showed both separate and pooled estimate; in both cases we included in  
30  
31 the meta-analysis the combined estimates; further, Pollack et al. included an operative cohort  
32  
33 comprising women scheduled for laparoscopy/laparotomy and an aged-matched population cohort  
34  
35 of women who underwent pelvic magnetic resonance for the detection of endometriosis, and we  
36  
37 summed up the two groups<sup>70</sup>.

38  
39  
40  
41  
42  
43  
44  
45  
46  
47 ~~Figure 2 shows the study-specific and summary RRs of endometriosis for ever smokers versus non~~  
48  
49 ~~smokers. The summary RR from studies was 0.97 (95% CI: 0.86-1.09) ( $\chi^2$  heterogeneity between~~  
50  
51 ~~studies =37.23, p=0.011). Figure 3 gives the study-specific and summary RR of current (A) and~~  
52  
53 ~~former (B) smokers versus never smokers. The summary RR of current versus never smokers was~~  
54  
55 ~~0.94 (95% CI: 0.83-1.06) from 28 studies ( $\chi^2$  heterogeneity =54.76, p=0.001). The summary RR of~~  
56  
57

former versus never smokers was 0.95 (95% CI: 0.81-1.11) from 16 studies, with heterogeneity ( $\chi^2=30.63$ ,  $p=0.010$ ). Figure 4 shows the RR of moderate (A) and heavy (B) current smokers versus non-smokers, respectively. The summary RR from 8 studies were 0.87 (95% CI: 0.70-1.07) ( $\chi^2$  heterogeneity =12.58,  $p=0.083$ ), and 0.93 (95% CI: 0.69-1.26) ( $\chi^2$  heterogeneity =17.21,  $p=0.016$ ), for moderate and heavy smokers, respectively.

Considering ever smokers or separately former smokers, current smokers, moderate smokers and heavy smokers, no statistically significant association emerged (Figures 2-4).

Figure 5 shows the funnel plot for ever smokers versus non smokers. There was no evidence of publication bias ( $p=0.9240.054$ ).

When we restricted the analyses to 8-9 studies reporting risk estimates adjusted for confounding variables, risk estimates were 0.90 (95% CI: 0.77-1.06) for ever smokers, 0.87 (95% CI: 0.75-1.01) for former smokers, 0.86 (95% CI: 0.71-1.06) for current smokers, 0.87 (95% CI: 0.65-1.15) for moderate current smokers, and 0.95 (95% CI: 0.66-1.37) for heavy current smokers versus never smokers.

In subgroup analyses according to type of controls, estimates for ever versus non smokers were 0.97 (95% CI: 0.81-1.17) for 7 studies including fertile women, 0.92 (95% CI: 0.75-1.12) for 67 studies including infertile women, and 0.99 (95% CI: 0.83-1.19) for 1214 studies including both or not specified type of controls. Moreover, when we restricted the analyses to studies with cases and controls laparoscopically or surgically confirmed, the risk estimates were 0.98 (95% CI: 0.87-1.09) for ever smokers, 0.94 (95% CI: 0.85-1.03) for former smokers, 0.94 (95% CI: 0.77-1.07) for current smokers, 0.86 (95% CI: 0.66-1.12) for moderate smokers, and 0.97 (95% CI: 0.70-1.35) for heavy smokers.

Quality score, ranged between 2 and 7 (median 4.5). When we restricted the meta-analysis to 19 high quality studies (with quality score  $\geq 5$ ) the pooled estimates did not materially changed (data not shown).

1  
2  
3 Figure 6 shows the cumulative meta-analysis of endometriosis risk for ever smokers versus non  
4  
5 smokers over time, from 1986 to ~~2011~~2014. ~~The estimate was 0.90 (95% CI: 0.70-1.15) in 1986~~  
6  
7 ~~and 0.97 (95% CI: 0.86-1.09), with a few~~ small variations over time, ~~all the estimates being not~~  
8  
9 ~~significantly below unity in the RR estimates emerged.~~

## 14 DISCUSSION

15  
16 The present meta-analysis does not support an association between smoking and endometriosis risk.  
17  
18 No association emerged considering subgroups of ever, former, current, moderate and heavy  
19  
20 smokers, nor in sensitivity and subgroup analyses.

21  
22 However, this work may be affected by limitations and biases intrinsic in the original  
23  
24 observational studies included in the meta-analysis, as well as to the limits that we choose to apply  
25  
26 to the bibliographic search, including the restriction to searching PubMed only and the exclusion of  
27  
28 languages other than English. As regards the characteristics of the observational studies, a major  
29  
30 concern is the choice of the comparison group ascertainment of the presence or absence of  
31  
32 endometriosis. Some studies compared symptomatic cases with asymptomatic controls, and thus  
33  
34 could not distinguish factors related to endometriosis to those associated to pelvic pain or infertility.

35  
36 Moreover, generally asymptomatic controls did not undergo laparoscopy nor other surgical  
37  
38 procedures, and therefore the presence of asymptomatic endometriosis in these women cannot be  
39  
40 ruled out. Another concern is the fact that in some studies diagnosis of endometriosis was self  
41  
42 reported. Thus, a misclassification of cases and controls could not be definitively excluded.

43  
44 However, when we restricted the analyses to women in whom laparoscopy or a surgical procedure  
45  
46 had confirmed the presence or absence of endometriotic lesions, still we did not find any significant  
47  
48 association between smoking and endometriosis ~~of concern is the fact that in some studies diagnosis~~  
49  
50 ~~of endometriosis was self reported.~~ Further, tobacco smoking is based on patients' self-reported  
51  
52 information, thus some misclassification may have occurred. However, information on tobacco  
53  
54  
55  
56  
57  
58  
59  
60

1  
2  
3 smoking in observational studies has been shown to be satisfactorily reproducible and valid <sup>77-79</sup>.  
4  
5 For most studies included in the present meta-analysis only raw estimates were available, since  
6  
7 tobacco smoking was not the main topic of the paper and it was only reported as confounding  
8  
9 variable. However, estimates from these studies were similar to those from studies specifically  
10  
11 investigating the role of smoking, thus, allowing to rule out major publication bias on this issue.  
12  
13 Moreover, we did not find any relevant asymmetry in the funnel plot, and the Egger's test was not  
14  
15 statistically significant. Thus, publication bias is unlikely to have appreciably modified the relation  
16  
17 between tobacco smoking and endometriosis. Although previous studies have reported an  
18  
19 association between endometriosis and menstrual and reproductive factors, such as early menarche  
20  
21 <sup>7, 12</sup>, longer duration of bleeding <sup>7</sup>, intra-uterine device use <sup>80</sup>, or a lifelong regular menstrual pattern  
22  
23 of shorter cycles and heavy flows <sup>7, 12, 72, 81</sup>, nulliparity or low parity <sup>14, 30, 38, 82</sup>, only some studies  
24  
25 included in the present meta-analysis have accounted for the role of these factors in the estimate of  
26  
27 the relation between tobacco smoking and endometriosis. However, analyses based on adjusted  
28  
29 estimates only were comparable to those based on raw estimates.  
30  
31 Since endometriosis is an estrogen-dependent condition, the inverse association between smoking  
32  
33 and endometriosis found in some studies has generally been attributed to the antiestrogenic effect of  
34  
35 tobacco <sup>83</sup>. Some authors have suggested that estradiol might modulate the mediators of immune  
36  
37 system molecules or those involved in tissue cell adhesion and invasion <sup>84, 85</sup>. Moreover, a favorable  
38  
39 effect of smoking has been observed in other benign and malignant estrogen-related diseases, such  
40  
41 as endometrial cancer <sup>86</sup>, and fibroids <sup>87</sup>. The antiestrogenic effect of smoking on these conditions  
42  
43 could support a protective effect of smoking on endometriosis. Indeed, earlier studies tended to  
44  
45 support some inverse association, which however declined over time, and accumulating evidence  
46  
47 suggests the presence of some false positive findings in earlier studies <sup>88</sup>. Furthermore, tobacco  
48  
49 smoking has been associated with female infertility <sup>89</sup>, and thus the interpretation of the relation  
50  
51 between smoking and endometriosis may be influenced by the role of infertility.  
52  
53  
54  
55  
56  
57  
58  
59  
60



1  
2  
3 Despite the high prevalence of this condition, the epidemiology of endometriosis still needs to be  
4  
5 elucidated, for several reasons. Endometriosis is a complex condition in which a genetic  
6  
7 contribution and environmental factors seem to be involved<sup>90</sup>. Further, it is a disease characterized  
8  
9 by a still poorly defined phenotype. The disease stage depends on the type (cysts, implants,  
10  
11 nodules), location (ovary, peritoneum, bladder, ureter, etc.), appearance and depth of invasion of the  
12  
13 lesions, that can vary greatly among patients. The clinical presentation can be so variable and the  
14  
15 lesions of such diverse morphology that none of the pathogenetic models proposed (retrograde  
16  
17 menstruation, coelomic metaplasia, embryological origin) can fully explain the various aspects of  
18  
19 endometriosis, and none has been recognized as an ultimately valid explanatory model for all the  
20  
21 different forms and manifestations of the disease<sup>90</sup>. Moreover, an invasive procedure is needed to  
22  
23 diagnose it<sup>90,91</sup>. Furthermore, published studies differ in the case and control selection and  
24  
25 population definition, depending on the choices to consider fertile or infertile cases, and healthy  
26  
27 controls or patients with conditions other than endometriosis. Despite these possible sources of  
28  
29 variations, the consistency of results observed weighs against any relevant role of tobacco on  
30  
31 endometriosis.  
32  
33  
34  
35

36 In conclusion, the present meta-analysis ~~gives no support to the hypothesis of~~ failed to identify an  
37  
38 association between tobacco smoking and endometriosis. However, given the possible limitations of  
39  
40 the present study, further studies are needed to evaluate in deep the relationship and the potential  
41  
42 effect of smoking on different type of endometriosis.  
43  
44  
45  
46  
47  
48  
49  
50  
51  
52  
53  
54  
55  
56  
57  
58  
59  
60



1  
2  
3 **Acknowledgments:** The authors thank Mrs I. Garimoldi for editorial assistance.  
4

5 **Competing interests:** The authors declare they have no conflicts of interest  
6

7 **Contributors**  
8

9  
10 FP conceived the idea and planned the research. FB and SC performed the statistical analysis. FB,  
11 FC, ER, VC retrieved data. FP, FB, PV and CLV wrote the entire draft of the article and all  
12 subsequent drafts after critical review by all co-authors. All co-authors gave significant input in the  
13 preparation of the article and the analysis. FP is the guarantor for the article.  
14  
15

16  
17 **Data Sharing Statement:** No additional data available  
18

19 **Details of ethical approval:**  
20

21 No ethical approval was needed for this review.  
22  
23

24 **Funding:** none.  
25  
26  
27  
28  
29  
30  
31  
32  
33  
34  
35  
36  
37  
38  
39  
40  
41  
42  
43  
44  
45  
46  
47  
48  
49  
50  
51  
52  
53  
54  
55  
56  
57  
58  
59  
60

## REFERENCES

1. Donnez J, Van Langendonck A, Casanas-Roux F, Van Gossum JP, Pirard C, Jadoul P, et al. Current thinking on the pathogenesis of endometriosis. *Gynecol Obstet Invest* 2002;54 Suppl 1:52-8; discussion 59-62.
2. Moen MH, Muus KM. Endometriosis in pregnant and non-pregnant women at tubal sterilization. *Hum Reprod* 1991;6(5):699-702.
3. Matorras R, Rodriguez F, Pijoan JI, Ramon O, Gutierrez de Teran G, Rodriguez-Escudero F. Epidemiology of endometriosis in infertile women. *Fertil Steril* 1995;63(1):34-8.
4. Gruppo italiano per lo studio dell'endometriosi. Prevalence and anatomical distribution of endometriosis in women with selected gynaecological conditions: results from a multicentric Italian study. *Hum Reprod* 1994;9(6):1158-62.
5. Calhaz-Jorge C, Mol BW, Nunes J, Costa AP. Clinical predictive factors for endometriosis in a Portuguese infertile population. *Hum Reprod* 2004;19(9):2126-31.
6. Aban M, Ertunc D, Tok EC, Tamer L, Arslan M, Dilek S. Modulating interaction of glutathione-S-transferase polymorphisms with smoking in endometriosis. *J Reprod Med* 2007;52(8):715-21.
7. Cramer DW, Wilson E, Stillman RJ, Berger MJ, Belisle S, Schiff I, et al. The relation of endometriosis to menstrual characteristics, smoking, and exercise. *JAMA* 1986;255(14):1904-8.
8. Berube S, Marcoux S, Maheux R. Characteristics related to the prevalence of minimal or mild endometriosis in infertile women. Canadian Collaborative Group on Endometriosis. *Epidemiology* 1998;9(5):504-10.
9. Chapron C, Souza C, de Ziegler D, Lafay-Pillet MC, Ngo C, Bijaoui G, et al. Smoking habits of 411 women with histologically proven endometriosis and 567 unaffected women. *Fertil Steril* 2010;94(6):2353-5.
10. Gruppo Italiano per lo Studio dell'endometriosi. Risk factors for pelvic endometriosis in women with pelvic pain or infertility. Gruppo Italiano per lo Studio dell' endometriosi. *Eur J Obstet Gynecol Reprod Biol* 1999;83(2):195-9.
11. Hemmings R, Rivard M, Olive DL, Poliquin-Fleury J, Gagne D, Hugo P, et al. Evaluation of risk factors associated with endometriosis. *Fertil Steril* 2004;81(6):1513-21.

- 1  
2  
3  
4  
5  
6  
7  
8  
9  
10  
11  
12  
13  
14  
15  
16  
17  
18  
19  
20  
21  
22  
23  
24  
25  
26  
27  
28  
29  
30  
31  
32  
33  
34  
35  
36  
37  
38  
39  
40  
41  
42  
43  
44  
45  
46  
47  
48  
49  
50  
51  
52  
53  
54  
55  
56  
57  
58  
59  
60
12. Matalliotakis IM, Cakmak H, Fragouli YG, Goumenou AG, Mahutte NG, Arici A. Epidemiological characteristics in women with and without endometriosis in the Yale series. *Arch Gynecol Obstet* 2008;277(5):389-93.
  13. Missmer SA, Hankinson SE, Spiegelman D, Barbieri RL, Marshall LM, Hunter DJ. Incidence of laparoscopically confirmed endometriosis by demographic, anthropometric, and lifestyle factors. *Am J Epidemiol* 2004;160(8):784-96.
  14. Signorello LB, Harlow BL, Cramer DW, Spiegelman D, Hill JA. Epidemiologic determinants of endometriosis: a hospital-based case-control study. *Ann Epidemiol* 1997;7(4):267-741.
  15. Sanders SR, Cuneo SP, Turzillo AM. Effects of nicotine and cotinine on bovine theca interna and granulosa cells. *Reprod Toxicol* 2002;16(6):795-800.
  16. Vidal JD, VandeVoort CA, Marcus CB, Lazarewicz NR, Conley AJ. In vitro exposure to environmental tobacco smoke induces CYP1B1 expression in human luteinized granulosa cells. *Reprod Toxicol* 2006;22(4):731-7.
  17. Miceli F, Minici F, Tropea A, Catino S, Orlando M, Lamanna G, et al. Effects of nicotine on human luteal cells in vitro: a possible role on reproductive outcome for smoking women. *Biol Reprod* 2005;72(3):628-32.
  18. Paksy K, Rajczy K, Forgacs Z, Lazar P, Bernard A, Gati I, et al. Effect of cadmium on morphology and steroidogenesis of cultured human ovarian granulosa cells. *J Appl Toxicol* 1997;17(5):321-7.
  19. Piasek M, Laskey JW. Acute cadmium exposure and ovarian steroidogenesis in cycling and pregnant rats. *Reprod Toxicol* 1994;8(6):495-507.
  20. Goncalves RB, Coletta RD, Silverio KG, Benevides L, Casati MZ, da Silva JS, et al. Impact of smoking on inflammation: overview of molecular mechanisms. *Inflamm Res* 2011;60(5):409-24.
  21. Stroup DF, Berlin JA, Morton SC, Olkin I, Williamson GD, Rennie D, et al. Meta-analysis of observational studies in epidemiology: a proposal for reporting. Meta-analysis Of Observational Studies in Epidemiology (MOOSE) group. *JAMA* 2000;283(15):2008-12.
  22. Ottawa Hospital Research Institute. The Newcastle-Ottawa Scale (NOS) for assessing the quality of nonrandomised studies in meta-analyses.
  23. Hamling J, Lee P, Weitkunat R, Ambuhl M. Facilitating meta-analyses by deriving relative effect and precision estimates for alternative comparisons from a set of estimates presented by exposure level or disease category. *Stat Med* 2008;27(7):954-70.
  24. DerSimonian R, Laird N. Meta-analysis in clinical trials. *Control Clin Trials* 1986;7(3):177-88.

- 1
- 2
- 3 25. Greenland S. Quantitative methods in the review of epidemiologic literature. *Epidemiol Rev*
- 4 1987;9:1-30.
- 5
- 6 26. Higgins JP, Thompson SG. Quantifying heterogeneity in a meta-analysis. *Stat Med*
- 7 2002;21(11):1539-58.
- 8
- 9
- 10 27. Lau J, Antman EM, Jimenez-Silva J, Kupelnick B, Mosteller F, Chalmers TC. Cumulative
- 11 meta-analysis of therapeutic trials for myocardial infarction. *N Engl J Med* 1992;327(4):248-
- 12 54.
- 13
- 14 28. Thornton A, Lee P. Publication bias in meta-analysis: its causes and consequences. *J Clin*
- 15 *Epidemiol* 2000;53(2):207-16.
- 16
- 17
- 18 29. Egger M, Davey Smith G, Schneider M, Minder C. Bias in meta-analysis detected by a simple,
- 19 graphical test. *BMJ* 1997;315(7109):629-34.
- 20
- 21 30. Darrow SL, Vena JE, Batt RE, Zielezny MA, Michalek AM, Selman S. Menstrual cycle
- 22 characteristics and the risk of endometriosis. *Epidemiology* 1993;4(2):135-42.
- 23
- 24 31. Itoh H, Iwasaki M, Hanaoka T, Sasaki H, Tanaka T, Tsugane S. Urinary phthalate monoesters
- 25 and endometriosis in infertile Japanese women. *Sci Total Environ* 2009;408(1):37-42.
- 26
- 27
- 28 32. Buck Louis GM, Chen Z, Peterson CM, Hediger ML, Croughan MS, Sundaram R, et al.
- 29 Persistent lipophilic environmental chemicals and endometriosis: the ENDO Study. *Environ*
- 30 *Health Perspect* 2012;120(6):811-6.
- 31
- 32
- 33 33. Beral V, Rolfs R, Joesoef MR, Aral S, Cramer DW. Primary infertility: characteristics of
- 34 women in North America according to pathological findings. *J Epidemiol Community*
- 35 *Health* 1994;48(6):576-9.
- 36
- 37
- 38 34. Cooney MA, Buck Louis GM, Hediger ML, Vexler A, Kostyniak PJ. Organochlorine pesticides
- 39 and endometriosis. *Reprod Toxicol* 2010;30(3):365-9.
- 40
- 41 35. Ferrero S, Pretta S, Bertoldi S, Anserini P, Remorgida V, Del Sette M, et al. Increased
- 42 frequency of migraine among women with endometriosis. *Hum Reprod* 2004;19(12):2927-
- 43 32.
- 44
- 45
- 46 36. Louis GM, Weiner JM, Whitcomb BW, Sperrazza R, Schisterman EF, Lobdell DT, et al.
- 47 Environmental PCB exposure and risk of endometriosis. *Hum Reprod* 2005;20(1):279-85.
- 48
- 49 37. Gagne D, Rivard M, Page M, Shazand K, Hugo P, Gosselin D. Blood leukocyte subsets are
- 50 modulated in patients with endometriosis. *Fertil Steril* 2003;80(1):43-53.
- 51
- 52
- 53 38. Grodstein F, Goldman MB, Cramer DW. Infertility in women and moderate alcohol use. *Am J*
- 54 *Public Health* 1994;84(9):1429-32.
- 55
- 56
- 57
- 58
- 59
- 60

- 1  
2  
3 39. Grodstein F, Goldman MB, Ryan L, Cramer DW. Relation of female infertility to consumption  
4 of caffeinated beverages. *Am J Epidemiol* 1993;137(12):1353-60.  
5  
6 40. Heilier JF, Verougstraete V, Nackers F, Tonglet R, Donnez J, Lison D. Assessment of cadmium  
7 impregnation in women suffering from endometriosis: a preliminary study. *Toxicol Lett*  
8 2004;154(1-2):89-93.  
9  
10 41. Marino JL, Holt VL, Chen C, Davis S. Shift work, hCLOCK T3111C polymorphism, and  
11 endometriosis risk. *Epidemiology* 2008;19(3):477-84.  
12  
13 42. Nagle CM, Bell TA, Purdie DM, Treloar SA, Olsen CM, Grover S, et al. Relative weight at  
14 ages 10 and 16 years and risk of endometriosis: a case-control analysis. *Hum Reprod*  
15 2009;24(6):1501-6.  
16  
17 43. Phipps WR, Cramer DW, Schiff I, Belisle S, Stillman R, Albrecht B, et al. The association  
18 between smoking and female infertility as influenced by cause of the infertility. *Fertil Steril*  
19 1987;48(3):377-82.  
20  
21 44. Trabert B, De Roos AJ, Schwartz SM, Peters U, Scholes D, Barr DB, et al. Non-dioxin-like  
22 polychlorinated biphenyls and risk of endometriosis. *Environ Health Perspect*  
23 2010;118(9):1280-5.  
24  
25 45. Tsuchiya M, Tsukino H, Iwasaki M, Sasaki H, Tanaka T, Katoh T, et al. Interaction between  
26 cytochrome P450 gene polymorphisms and serum organochlorine TEQ levels in the risk of  
27 endometriosis. *Mol Hum Reprod* 2007;13(6):399-404.  
28  
29 46. Tsukino H, Hanaoka T, Sasaki H, Motoyama H, Hiroshima M, Tanaka T, et al. Associations  
30 between serum levels of selected organochlorine compounds and endometriosis in infertile  
31 Japanese women. *Environ Res* 2005;99(1):118-25.  
32  
33 47. Upson K, De Roos AJ, Thompson ML, Sathyanarayana S, Scholes D, Barr DB, et al.  
34 Organochlorine pesticides and risk of endometriosis: findings from a population-based case-  
35 control study. *Environ Health Perspect* 2013;121(11-12):1319-24.  
36  
37 48. Louis GM, Peterson CM, Chen Z, Hediger ML, Croughan MS, Sundaram R, et al.  
38 Perfluorochemicals and endometriosis: the ENDO study. *Epidemiology* 2012;23(6):799-805.  
39  
40 49. Andolf E, Thorsell M, Kallen K. Caesarean section and risk for endometriosis: a prospective  
41 cohort study of Swedish registries. *BJOG* 2013;120(9):1061-5.  
42  
43 50. Buck Louis GM, Hediger ML, Pena JB. Intrauterine exposures and risk of endometriosis. *Hum*  
44 *Reprod* 2007;22(12):3232-6.  
45  
46 51. Cayan F, Ertunc D, Aras-Ates N, Ayaz L, Akbay E, Karakas S, et al. Association of G1057D  
47 variant of insulin receptor substrate-2 with endometriosis. *Fertil Steril* 2010;94(5):1622-6.  
48  
49  
50  
51  
52  
53  
54  
55  
56  
57  
58  
59  
60

- 1  
2  
3 52. Coccia ME, Rizzello F, Mariani G, Bulletti C, Palagiano A, Scarselli G. Ovarian surgery for  
4 bilateral endometriomas influences age at menopause. *Hum Reprod* 2011;26(11):3000-7.  
5  
6 53. Dhillon PK, Holt VL. Recreational physical activity and endometrioma risk. *Am J Epidemiol*  
7 2003;158(2):156-64.  
8  
9 54. Eskenazi B, Mocarelli P, Warner M, Samuels S, Vercellini P, Olive D, et al. Serum dioxin  
10 concentrations and endometriosis: a cohort study in Seveso, Italy. *Environ Health Perspect*  
11 2002;110(7):629-34.  
12  
13 55. Falconer H, Sundqvist J, Xu H, Vodolazkaia A, Fassbender A, Kyama C, et al. Analysis of  
14 common variations in tumor-suppressor genes on chr1p36 among Caucasian women with  
15 endometriosis. *Gynecol Oncol* 2012;127(2):398-402.  
16  
17 56. Ferrero S, Petrera P, Colombo BM, Navaratnarajah R, Parisi M, Anserini P, et al. Asthma in  
18 women with endometriosis. *Hum Reprod* 2005;20(12):3514-7.  
19  
20 57. Heilier JF, Donnez J, Nackers F, Rousseau R, Verougstraete V, Rosenkranz K, et al.  
21 Environmental and host-associated risk factors in endometriosis and deep endometriotic  
22 nodules: a matched case-control study. *Environ Res* 2007;103(1):121-9.  
23  
24 58. Hoffman CS, Small CM, Blanck HM, Tolbert P, Rubin C, Marcus M. Endometriosis among  
25 women exposed to polybrominated biphenyls. *Ann Epidemiol* 2007;17(7):503-10.  
26  
27 59. Huang PC, Tsai EM, Li WF, Liao PC, Chung MC, Wang YH, et al. Association between  
28 phthalate exposure and glutathione S-transferase M1 polymorphism in adenomyosis,  
29 leiomyoma and endometriosis. *Hum Reprod* 2010;25(4):986-94.  
30  
31 60. Huber A, Keck CC, Hefler LA, Schneeberger C, Huber JC, Bentz EK, et al. Ten estrogen-  
32 related polymorphisms and endometriosis: a study of multiple gene-gene interactions.  
33 *Obstet Gynecol* 2005;106(5 Pt 1):1025-31.  
34  
35 61. Jackson LW, Zullo MD, Goldberg JM. The association between heavy metals, endometriosis  
36 and uterine myomas among premenopausal women: National Health and Nutrition  
37 Examination Survey 1999-2002. *Hum Reprod* 2008;23(3):679-87.  
38  
39 62. Kortelahti M, Anttila MA, Hippelainen MI, Heinonen ST. Obstetric outcome in women with  
40 endometriosis--a matched case-control study. *Gynecol Obstet Invest* 2003;56(4):207-12.  
41  
42 63. Lebel G, Dodin S, Ayotte P, Marcoux S, Ferron LA, Dewailly E. Organochlorine exposure and  
43 the risk of endometriosis. *Fertil Steril* 1998;69(2):221-8.  
44  
45 64. Marino JL, Holt VL, Chen C, Davis S. Lifetime occupational history and risk of endometriosis.  
46 *Scand J Work Environ Health* 2009;35(3):233-40.  
47  
48  
49  
50  
51  
52  
53  
54  
55  
56  
57  
58  
59  
60



- 1  
2  
3 65. McCarty CA, Berg RL, Welter JD, Kitchner TE, Kemnitz JW. A novel gene-environment  
4 interaction involved in endometriosis. *Int J Gynaecol Obstet* 2012;116(1):61-3.  
5  
6 66. Moen MH, Schei B. Epidemiology of endometriosis in a Norwegian county. *Acta Obstet*  
7 *Gynecol Scand* 1997;76(6):559-62.  
8  
9 67. Niskar AS, Needham LL, Rubin C, Turner WE, Martin CA, Patterson DG, Jr., et al. Serum  
10 dioxins, polychlorinated biphenyls, and endometriosis: a case-control study in Atlanta.  
11 *Chemosphere* 2009;74(7):944-9.  
12  
13 68. Parazzini F, Cipriani S, Bianchi S, Gotsch F, Zanconato G, Fedele L. Risk factors for deep  
14 endometriosis: a comparison with pelvic and ovarian endometriosis. *Fertil Steril*  
15 2008;90(1):174-9.  
16  
17 69. Pauwels A, Schepens PJ, D'Hooghe T, Delbeke L, Dhont M, Brouwer A, et al. The risk of  
18 endometriosis and exposure to dioxins and polychlorinated biphenyls: a case-control study  
19 of infertile women. *Hum Reprod* 2001;16(10):2050-5.  
20  
21 70. Pollack AZ, Louis GM, Chen Z, Peterson CM, Sundaram R, Croughan MS, et al. Trace  
22 elements and endometriosis: the ENDO study. *Reprod Toxicol* 2013;42:41-8.  
23  
24 71. Porpora MG, Medda E, Abballe A, Bolli S, De Angelis I, di Domenico A, et al. Endometriosis  
25 and organochlorinated environmental pollutants: a case-control study on Italian women of  
26 reproductive age. *Environ Health Perspect* 2009;117(7):1070-5.  
27  
28 72. Sangi-Haghpeykar H, Poindexter AN, 3rd. Epidemiology of endometriosis among parous  
29 women. *Obstet Gynecol* 1995;85(6):983-92.  
30  
31 73. Treloar SA, Bell TA, Nagle CM, Purdie DM, Green AC. Early menstrual characteristics  
32 associated with subsequent diagnosis of endometriosis. *Am J Obstet Gynecol*  
33 2010;202(6):534 e1-6.  
34  
35 74. Tsai CW, Ho CY, Shih LC, Ying TH, Hsieh YH, Chen YC, et al. The joint effect of hOGG1  
36 genotype and smoking habit on endometriosis in Taiwan. *Chin J Physiol* 2013;56(5):263-8.  
37  
38 75. Tsuchiya M, Miura T, Hanaoka T, Iwasaki M, Sasaki H, Tanaka T, et al. Effect of soy  
39 isoflavones on endometriosis: interaction with estrogen receptor 2 gene polymorphism.  
40 *Epidemiology* 2007;18(3):402-8.  
41  
42 76. Tu FF, Du H, Goldstein GP, Beaumont JL, Zhou Y, Brown WJ. The influence of prior oral  
43 contraceptive use on risk of endometriosis is conditional on parity. *Fertil Steril*  
44 2014;101(6):1697-704.  
45  
46  
47  
48  
49  
50  
51  
52  
53  
54  
55  
56  
57  
58  
59  
60

- 1  
2  
3 77. D' Avanzo B, La Vecchia C, Katsouyanni K, Negri E, Trichopoulos D. Reliability of  
4 information on cigarette smoking and beverage consumption provided by hospital controls.  
5 *Epidemiology* 1996;7(3):312-5.  
6  
7  
8 78. Lee MM, Whittemore AS, Lung DL. Reliability of recalled physical activity, cigarette smoking,  
9 and alcohol consumption. *Ann Epidemiol* 1992;2(5):705-14.  
10  
11 79. Patrick DL, Cheadle A, Thompson DC, Diehr P, Koepsell T, Kinne S. The validity of self-  
12 reported smoking: a review and meta-analysis. *Am J Public Health* 1994;84(7):1086-93.  
13  
14 80. Kirshon B, Poindexter AN, 3rd. Contraception: a risk factor for endometriosis. *Obstet Gynecol*  
15 1988;71(6 Pt 1):829-31.  
16  
17 81. Parazzini F, Ferraroni M, Fedele L, Bocciolone L, Rubessa S, Riccardi A. Pelvic endometriosis:  
18 reproductive and menstrual risk factors at different stages in Lombardy, northern Italy. *J*  
19 *Epidemiol Community Health* 1995;49(1):61-4.  
20  
21 82. Candiani GB, Danesino V, Gastaldi A, Parazzini F, Ferraroni M. Reproductive and menstrual  
22 factors and risk of peritoneal and ovarian endometriosis. *Fertil Steril* 1991;56(2):230-4.  
23  
24 83. Baron JA, La Vecchia C, Levi F. The antiestrogenic effect of cigarette smoking in women. *Am J*  
25 *Obstet Gynecol* 1990;162(2):502-14.  
26  
27 84. Boucher A, Mourad W, Mailloux J, Lemay A, Akoum A. Ovarian hormones modulate  
28 monocyte chemotactic protein-1 expression in endometrial cells of women with  
29 endometriosis. *Mol Hum Reprod* 2000;6(7):618-26.  
30  
31 85. Osteen KG, Bruner KL, Sharpe-Timms KL. Steroid and growth factor regulation of matrix  
32 metalloproteinase expression and endometriosis. *Semin Reprod Endocrinol* 1996;14(3):247-  
33 55.  
34  
35 86. Parazzini F, La Vecchia C, Bocciolone L, Franceschi S. The epidemiology of endometrial  
36 cancer. *Gynecol Oncol* 1991;41(1):1-16.  
37  
38 87. Parazzini F, Negri E, La Vecchia C, Rabaiotti M, Luchini L, Villa A, et al. Uterine myomas and  
39 smoking. Results from an Italian study. *J Reprod Med* 1996;41(5):316-20.  
40  
41 88. Boffetta P, McLaughlin JK, La Vecchia C, Tarone RE, Lipworth L, Blot WJ. False-positive  
42 results in cancer epidemiology: a plea for epistemological modesty. *J Natl Cancer Inst*  
43 2008;100(14):988-95.  
44  
45 89. Practice Committee of the American Society for Reproductive Medicine. Smoking and  
46 infertility: a committee opinion. *Fertil Steril* 2012;98(6):1400-6.  
47  
48 90. Viganò P, Somigliana E, Panina P, Rabellotti E, Vercellini P, Candiani M. Principles of  
49 phenomics in endometriosis. *Hum Reprod Update* 2012;18(3):248-59.  
50  
51  
52  
53  
54  
55  
56  
57  
58  
59  
60



- 1  
2  
3 91. Gentilini D, Perino A, Vigano P, Chiodo I, Cucinella G, Vignali M, et al. Gene expression  
4 profiling of peripheral blood mononuclear cells in endometriosis identifies genes altered in  
5 non-gynaecologic chronic inflammatory diseases. *Hum Reprod* 2011;26(11):3109-17.  
6  
7  
8  
9  
10  
11  
12  
13  
14  
15  
16  
17  
18  
19  
20  
21  
22  
23  
24  
25  
26  
27  
28  
29  
30  
31  
32  
33  
34  
35  
36  
37  
38  
39  
40  
41  
42  
43  
44  
45  
46  
47  
48  
49  
50  
51  
52  
53  
54  
55  
56  
57  
58  
59  
60

For peer review only

**FIGURE LEGENDS**

**Figure 1** – Flow chart of the selection of studies on tobacco smoking and risk of endometriosis included in the meta-analysis.

**Figure 2** – Study-specific and summary relative risks (RR) of endometriosis for ever smokers versus non smokers.

CI: confidence interval.

**Figure 3** – Study-specific and summary relative risks (RR) of endometriosis for current (A) and former smokers (B) versus non smokers.

CI: confidence interval.

**Figure 4** – Study-specific and summary relative risks (RR) of endometriosis for moderate (A) and heavy (B) current smokers versus non smokers.

CI: confidence interval.

**Figure 5** – Funnel-plot of studies on tobacco smoking and risk of endometriosis.

RR: relative risk for ever smokers versus non smokers; CI: confidence interval; s.e.: standard error.

**Figure 6** - Cumulative meta-analysis of studies on tobacco smoking and risk of endometriosis.

RR: relative risk for ~~coffee consumption versus no consumption~~ ever smokers versus non smokers;

CI: confidence interval.

### Appendix

The PubMed search was performed using the following search terms: "tobacco"[MeSH Terms] OR tobacco[Text Word] OR "smoking"[MeSH Terms] OR smoking[Text Word] OR cigarette[All Fields] OR risk factor OR epidemiology AND endometriosis. The search was limited to papers on Humans, written in English.

For peer review only

Figure 1

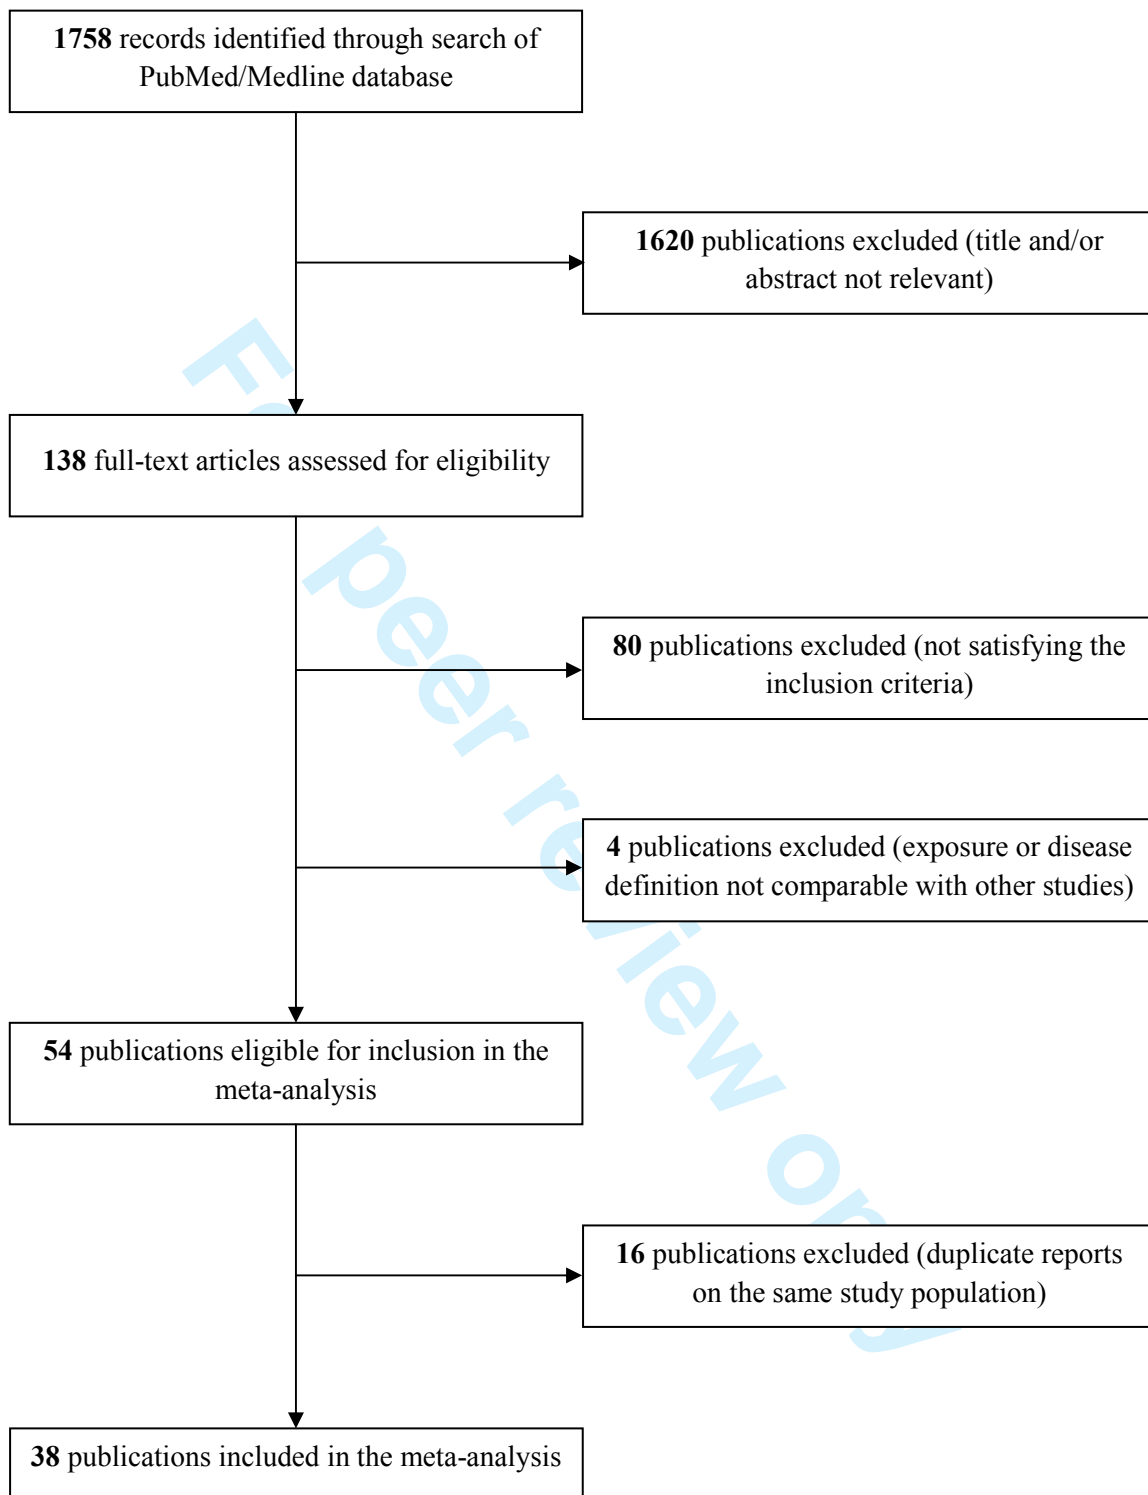

1  
2  
3  
4  
5  
6  
7  
8  
9  
10  
11  
12  
13  
14  
15  
16  
17  
18  
19  
20  
21  
22  
23  
24  
25  
26  
27  
28  
29  
30  
31  
32  
33  
34  
35  
36  
37  
38  
39  
40  
41  
42  
43  
44  
45  
46  
47  
48  
49  
50  
51  
52  
53  
54  
55  
56  
57  
58  
59  
60

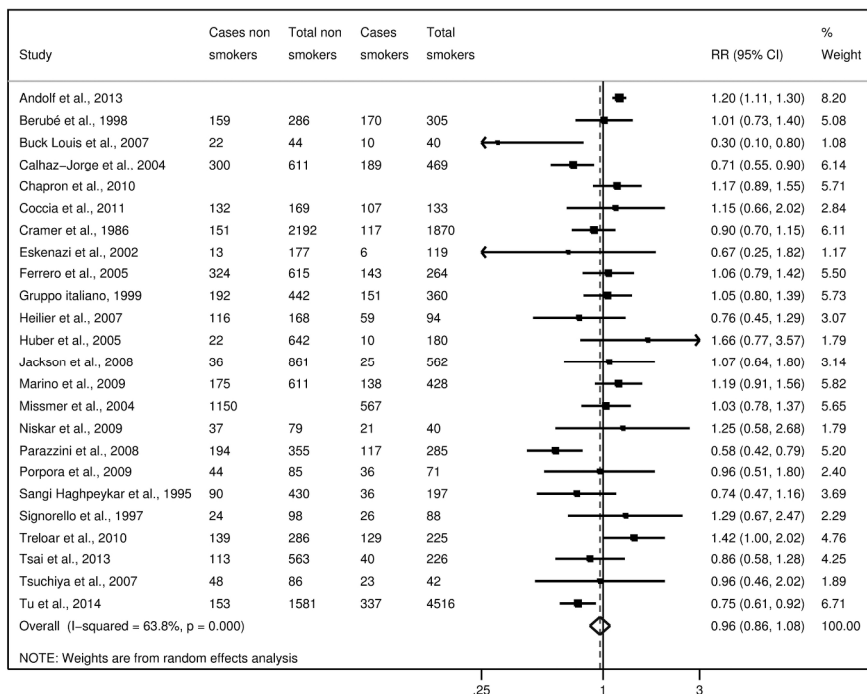

229x175mm (300 x 300 DPI)

Review only

1  
2  
3  
4  
5  
6  
7  
8  
9  
10  
11  
12  
13  
14  
15  
16  
17  
18  
19  
20  
21  
22  
23  
24  
25  
26  
27  
28  
29  
30  
31  
32  
33  
34  
35  
36  
37  
38  
39  
40  
41  
42  
43  
44  
45  
46  
47  
48  
49  
50  
51  
52  
53  
54  
55  
56  
57  
58  
59  
60

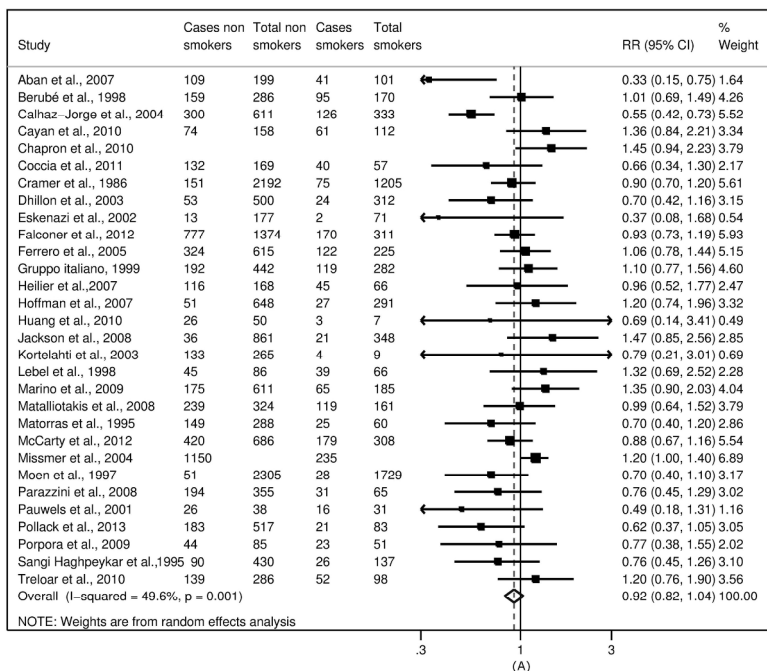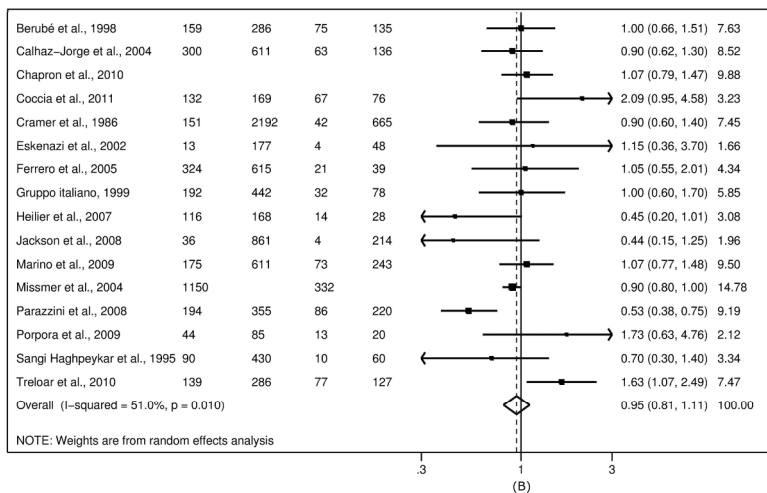

211x302mm (300 x 300 DPI)

1  
2  
3  
4  
5  
6  
7  
8  
9  
10  
11  
12  
13  
14  
15  
16  
17  
18  
19  
20  
21  
22  
23  
24  
25  
26  
27  
28  
29  
30  
31  
32  
33  
34  
35  
36  
37  
38  
39  
40  
41  
42  
43  
44  
45  
46  
47  
48  
49  
50  
51  
52  
53  
54  
55  
56  
57  
58  
59  
60

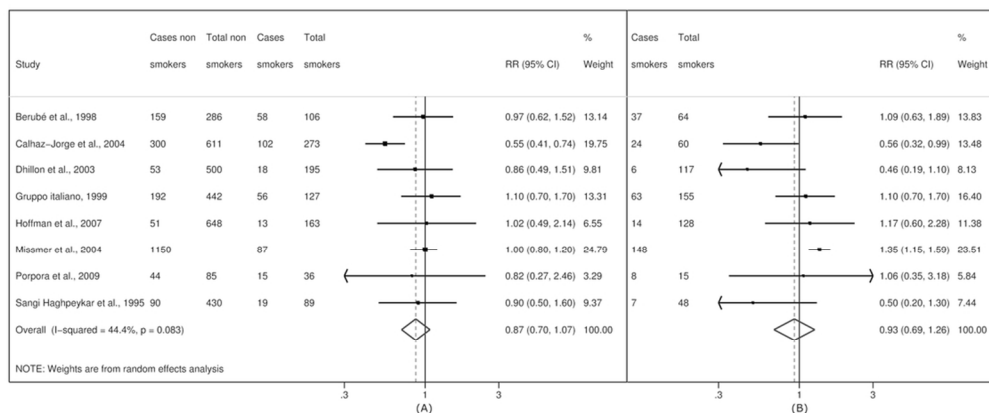

95x42mm (300 x 300 DPI)

Peer review only

1  
2  
3  
4  
5  
6  
7  
8  
9  
10  
11  
12  
13  
14  
15  
16  
17  
18  
19  
20  
21  
22  
23  
24  
25  
26  
27  
28  
29  
30  
31  
32  
33  
34  
35  
36  
37  
38  
39  
40  
41  
42  
43  
44  
45  
46  
47  
48  
49  
50  
51  
52  
53  
54  
55  
56  
57  
58  
59  
60

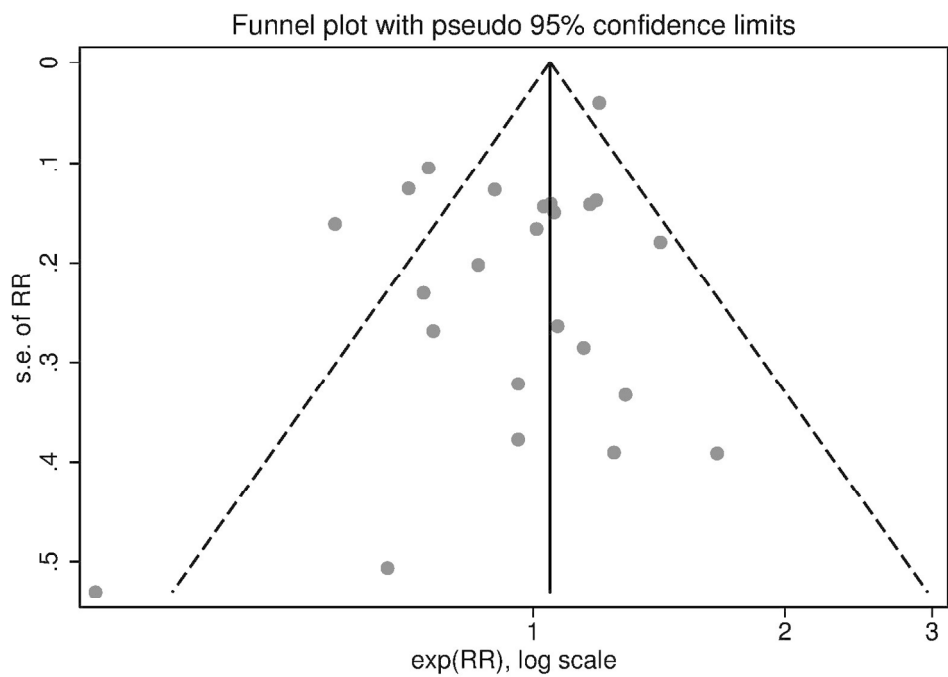

141x105mm (300 x 300 DPI)

Review only



1  
2  
3  
4  
5  
6  
7  
8  
9  
10  
11  
12  
13  
14  
15  
16  
17  
18  
19  
20  
21  
22  
23  
24  
25  
26  
27  
28  
29  
30  
31  
32  
33  
34  
35  
36  
37  
38  
39  
40  
41  
42  
43  
44  
45  
46  
47

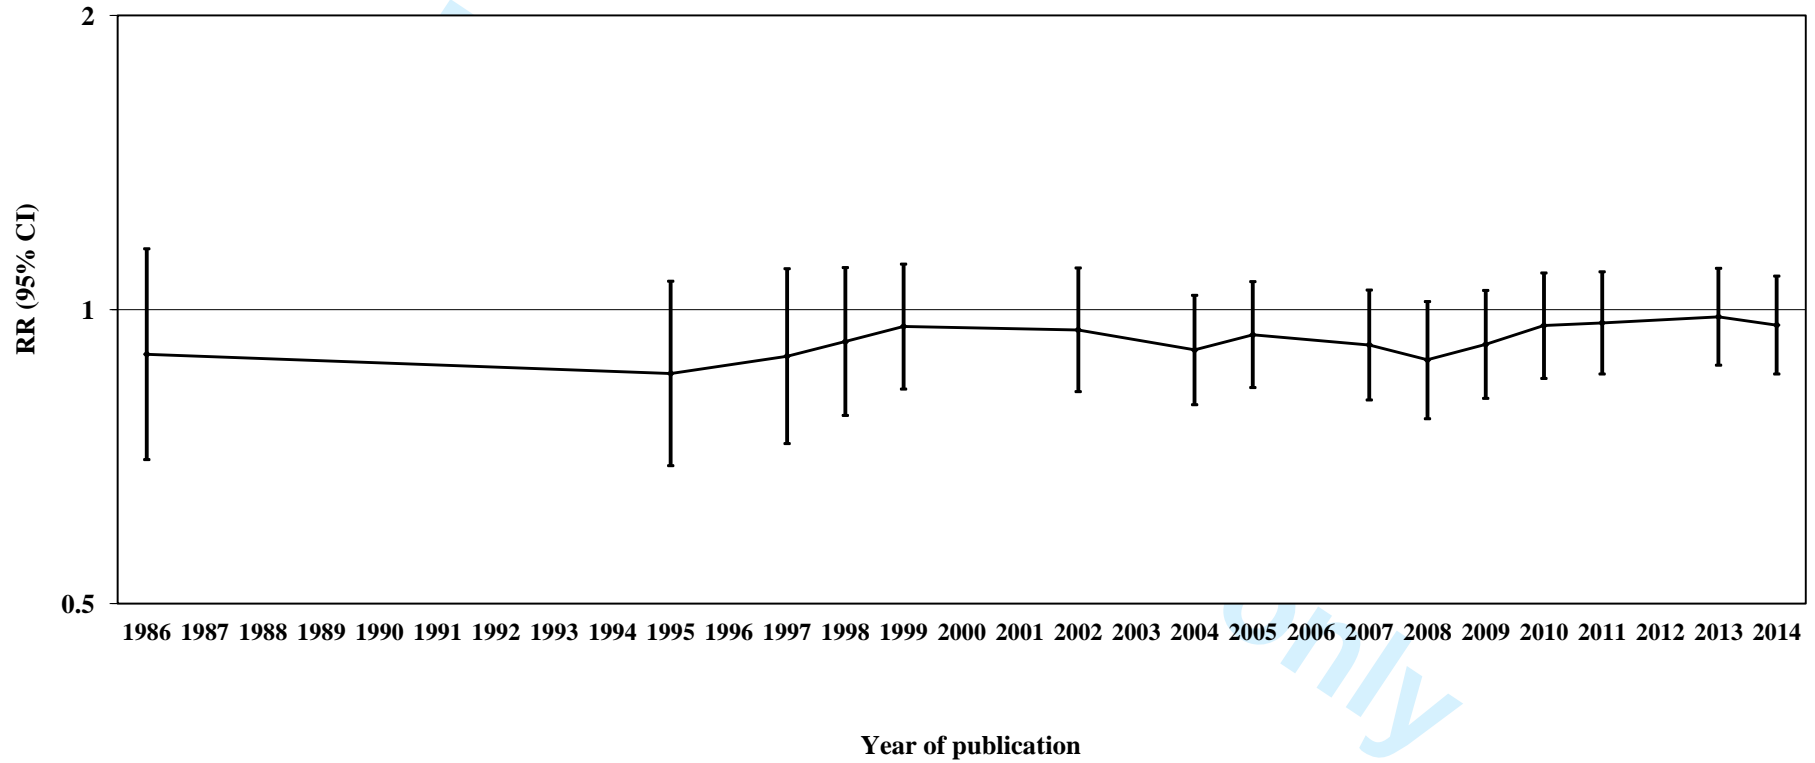

## Supplementary file

**Table 1** – Main characteristics of the studies on tobacco smoking and risk of endometriosis included in the meta-analysis.

| Study                                 | Country | Study design | Cases                                                                                                 | Controls                                                                                                                  | Sample size cases/controls | Age (years)                                               | Smoking habit                                           | Confounding factors                                                                                   | Quality score |
|---------------------------------------|---------|--------------|-------------------------------------------------------------------------------------------------------|---------------------------------------------------------------------------------------------------------------------------|----------------------------|-----------------------------------------------------------|---------------------------------------------------------|-------------------------------------------------------------------------------------------------------|---------------|
| Aban et al., 2007 <sup>6</sup>        | Turkey  | Case-control | Women with endometriosis (surgically and histologically confirmed)                                    | Women without endometriosis (surgically confirmed) undergoing tubal ligation, infertility workup, or ovarian cysts workup | 150/150                    | mean 33.06 ± 8.67 for cases and 34.04 ± 9.68 for controls | Never, current smoker                                   | Body mass index, age at menarche, education, socioeconomic status, cycle length, duration of bleeding | 7             |
| Andolf et al., 2013 <sup>49</sup>     | Sweden  | Cohort       | Women who delivered their first born, with endometriosis (identified in the Swedish Patient Register) | Women who delivered their first born, without endometriosis (identified in the Swedish Patient Register)                  | 3110/705980                | <55                                                       | Ever smoker                                             | Caesarean section, maternal age, body mass index, years of involuntary childlessness                  | 6             |
| Berubé et al., 1998 <sup>8</sup>      | Canada  | Case-control | Infertile women with endometriosis (laparoscopically confirmed)                                       | Infertile women without endometriosis (laparoscopically confirmed)                                                        | 329/262                    | 20-39                                                     | Never, former, current smoker (<20, ≥20 cigarettes/day) | -                                                                                                     | 5             |
| Buck Louis et al., 2007 <sup>50</sup> | USA     | Cohort       | Women with endometriosis (laparoscopically confirmed)                                                 | Women without endometriosis                                                                                               | 32/52                      | 18-40                                                     | Never, ever smoker                                      | Age                                                                                                   | 4             |

| Study                                  | Country  | Study design | Cases                                                                                                                         | Controls                                                           | Sample size cases/controls | Age (years)                                                                                     | Smoking habit                                                   | Confounding factors                                                                                                 | Quality score |
|----------------------------------------|----------|--------------|-------------------------------------------------------------------------------------------------------------------------------|--------------------------------------------------------------------|----------------------------|-------------------------------------------------------------------------------------------------|-----------------------------------------------------------------|---------------------------------------------------------------------------------------------------------------------|---------------|
| Calhaz-Jorge et al., 2004 <sup>5</sup> | Portugal | Cohort       | Infertile women with endometriosis (laparoscopically confirmed); separate groups of grade I-II and grade III/IV endometriosis | Infertile women without endometriosis (laparoscopically confirmed) | 488/591                    | mean 30.9 ± 3.9 for AFS grade I/II, 30.7 ± 4.0 for ASF grade III/IV and 30.9 ± 4.2 for controls | Never, former, current smoker (1-10, 11-20, >20 cigarettes/day) | Ethnicity, dysmenorrhoea, chronic pelvic pain, cycle regularity, body mass index, previous pregnancies, ever OC use | 4             |
| Cayan et al., 2010 <sup>51</sup>       | Turkey   | Case-control | Women with endometriosis (laparoscopically confirmed)                                                                         | Women without endometriosis (laparoscopically confirmed)           | 135/135                    | mean 39.36 ± 8.88 for cases and 41.6 ± 8.92 for controls                                        | Non smoker, smoker                                              | -                                                                                                                   | 4             |
| Chapron et al., 2010 <sup>9</sup>      | France   | Case-control | Women with endometriosis (laparoscopically confirmed)                                                                         | Women without endometriosis (laparoscopically confirmed)           | 411/567                    | <42 years                                                                                       | Ever, former, current smoker                                    | Age, ethnicity, gravidity, parity, infertility, body mass index                                                     | 7             |
| Coccia et al., 2011 <sup>52</sup>      | Italy    | Cohort       | Women with endometriosis (laparoscopically confirmed) Separate groups of monolateral and bilateral endometriosis              | Women without endometriosis (laparoscopically confirmed)           | 239/63                     | mean 32.6 ± 5.6                                                                                 | Never, former, current smoker                                   | -                                                                                                                   | 5             |

| Study                               | Country | Study design | Cases                                                                                                                                                   | Controls                                                                  | Sample size cases/controls | Age (years)                                                   | Smoking habit                                                   | Confounding factors                                                                                            | Quality score |
|-------------------------------------|---------|--------------|---------------------------------------------------------------------------------------------------------------------------------------------------------|---------------------------------------------------------------------------|----------------------------|---------------------------------------------------------------|-----------------------------------------------------------------|----------------------------------------------------------------------------------------------------------------|---------------|
| Cramer et al., 1986 <sup>7</sup>    | USA     | Case-control | Infertile women with endometriosis                                                                                                                      | Women admitted to hospital for delivery                                   | 268/3794                   | NA                                                            | Never, former, current smoker                                   | Center, age, education, religion, years since menarche, menstrual pain, cycle length, weight, height, exercise | 4             |
| Dhillon et al., 2003 <sup>53</sup>  | USA     | Case-control | Women with cystic ovarian endometriosis (endometrioma)                                                                                                  | Women receiving care from the same health maintenance organization        | 77/735                     | 18-39                                                         | Non smoker, smoker ( $\leq 0.5$ , $0.5-1$ , $\geq 1$ packs/day) | -                                                                                                              | 3             |
| Eskenazi et al., 2002 <sup>54</sup> | Italy   | Cohort       | Women $\leq 30$ yrs in 1976 with stored sera resident near Seveso in 1976, with endometriosis (confirmed through laparoscopy, laparotomy or ultrasound) | Women $\leq 30$ yrs in 1976 with stored sera resident near Seveso in 1976 | 19/277                     | $\geq 20$                                                     | Never, former, current smoker                                   | -                                                                                                              | 6             |
| Falconer et al., 2012 <sup>55</sup> | Belgium | Case-control | Women with endometriosis who underwent laparoscopy for subfertility                                                                                     | Women without endometriosis who underwent laparoscopy for subfertility    | 947/738                    | mean $31.5 \pm 4.7$ for cases and $32.1 \pm 5.0$ for controls | Current smoker                                                  | -                                                                                                              | 4             |

| Study                                                               | Country | Study design | Cases                                                                                                                                                                          | Controls                                                                                                                                                                          | Sample size cases/controls | Age (years)                                           | Smoking habit                                           | Confounding factors                            | Quality score |
|---------------------------------------------------------------------|---------|--------------|--------------------------------------------------------------------------------------------------------------------------------------------------------------------------------|-----------------------------------------------------------------------------------------------------------------------------------------------------------------------------------|----------------------------|-------------------------------------------------------|---------------------------------------------------------|------------------------------------------------|---------------|
| Ferrero et al., 2005 <sup>56</sup>                                  | Italy   | Case-control | Women of reproductive age undergoing surgery because of uterine myomas, ovarian cysts, pelvic pain, dysmenhorrea, or infertility with endometriosis (histologically confirmed) | Women of reproductive age undergoing surgery because of uterine myomas, ovarian cysts, pelvic pain, dysmenhorrea, or infertility without endometriosis (histologically confirmed) | 467/412                    | mean 34.3 ± 6.0 for cases and 34.5 ± 4.9 for controls | Never, former, current smoker                           | -                                              | 4             |
| Gruppo Italiano per lo Studio dell'endometriosi, 1999 <sup>10</sup> | Italy   | Case-control | Women with infertility or pelvic pain with endometriosis (laparoscopically confirmed); separate groups of pelvic pain and infertility                                          | Women with infertility or pelvic pain without endometriosis (laparoscopically confirmed); separate groups of pelvic pain and infertility                                          | 345/472                    | 18-43                                                 | Never, former, current smoker (<10, ≥10 cigarettes/day) | Age, parity, center, education, marital status | 7             |
| Heilier et al., 2007 <sup>57</sup>                                  | Belgium | Case-control | Women with peritoneal endometriosis or deep endometriotic nodules (surgically confirmed); separate groups of endometriosis and deep endometriotic nodules                      | Women who consulted the same gynecologists of cases, with no clinical evidence of endometriosis                                                                                   | 88+88/88                   | 21-50                                                 | Never, former, current smoker                           | -                                              | 3             |
| Hoffman et al., 2007 <sup>58</sup>                                  | USA     | Cohort       | Women enrolled in the Michigan Polybrominated Biphenyls cohort, with self-reported endometriosis                                                                               | Women enrolled in the Michigan Polybrominated Biphenyls cohort, without endometriosis                                                                                             | 79/864                     | mean 45 ± 14.4                                        | Non, current smoker (1-15, >15 cigarettes/day)          | .                                              | 2             |

| Study                                 | Country            | Study design | Cases                                                               | Controls                                                                                                                                     | Sample size cases/controls | Age (years)                                           | Smoking habit                 | Confounding factors | Quality score |
|---------------------------------------|--------------------|--------------|---------------------------------------------------------------------|----------------------------------------------------------------------------------------------------------------------------------------------|----------------------------|-------------------------------------------------------|-------------------------------|---------------------|---------------|
| Huang et al., 2010 <sup>59</sup>      | Taiwan             | Case-control | Women with endometriosis (laparoscopically confirmed)               | Women without endometriosis, adenomyosis and leiomyomas (laparoscopically confirmed)                                                         | 28/29                      | mean 34.3 ±7.5 for cases and 36.2 ± 9.0 for controls  | Current smoker                | -                   | 5             |
| Huber et al., 2005 <sup>60</sup>      | Austria            | Case-control | Women with endometriosis (surgically and histologically confirmed)  | Healthy women without endometriosis (based on personal interview)                                                                            | 32/790                     | mean 52.3 ± 5.4 for cases and 34.6 ±7.0 for controls  | Ever smoker                   | -                   | 5             |
| Jackson et al., 2008 <sup>61</sup>    | USA (NHANES study) | Case-control | Women with self-reported diagnosis of endometriosis                 | Women without self-reported diagnosis of endometriosis                                                                                       | 61/1362                    | 20-49                                                 | Never, former, current smoker | -                   | 2             |
| Kortelahti et al., 2003 <sup>62</sup> | Finland            | Case-control | Women with endometriosis (histologically confirmed)                 | Women who underwent laparoscopy for tubal sterilization, and women who underwent in vitro fertilization for reasons other than endometriosis | 137/137                    | mean 31.2 ± 5.1 for cases and 34.0 ± 4.6 for controls | Current smoker                | -                   | 3             |
| Lebel et al., 1998 <sup>63</sup>      | Canada             | Case-control | Premenopausal women with endometriosis (laparoscopically confirmed) | Premenopausal women without endometriosis (laparoscopically confirmed)                                                                       | 86/70                      | 18-50                                                 | Current non smoker            | -                   | 5             |

| Study                                    | Country | Study design                    | Cases                                                                                             | Controls                                                                  | Sample size cases/controls | Age (years)                                               | Smoking habit                                                          | Confounding factors                                                       | Quality score |
|------------------------------------------|---------|---------------------------------|---------------------------------------------------------------------------------------------------|---------------------------------------------------------------------------|----------------------------|-----------------------------------------------------------|------------------------------------------------------------------------|---------------------------------------------------------------------------|---------------|
| Marino et al., 2009 <sup>64</sup>        | USA     | Case-control                    | Women enrolled in a health maintenance organization with surgically confirmed endometriosis       | Women enrolled in a health maintenance organization without endometriosis | 313/727                    | 18-49                                                     | Never, former, current smoker                                          | -                                                                         | 5             |
| Matalliotakis et al., 2008 <sup>12</sup> | USA     | Case-control                    | Women with endometriosis (laparoscopically confirmed)                                             | Infertile women without endometriosis undergoing laparoscopy              | 535/200                    | 15-56                                                     | Current smoker                                                         | -                                                                         | 5             |
| Matorras et al., 1995 <sup>3</sup>       | Spain   | Case-control                    | Infertile women with endometriosis (laparoscopically confirmed)                                   | Infertile women without endometriosis (laparoscopically confirmed)        | 174/174                    | mean 29.49 ± 3.41 for cases and 29.58 ± 3.66 for controls | Current smoker                                                         | -                                                                         | 4             |
| McCarty et al., 2012 <sup>65</sup>       | USA     | Case-control                    | Women with endometriosis (laparoscopically confirmed)                                             | Women without endometriosis (laparoscopically confirmed)                  | 796/501                    | ≥18                                                       | Never smoker                                                           | -                                                                         | 5             |
| Missmer et al., 2004 <sup>13</sup>       | USA     | Cohort (Nurses Health Study II) | Women with self-reported endometriosis                                                            | Women aged without self-reported endometriosis                            | 1721/88344                 | 25-52                                                     | Never, former, current smoker (1-14, 15-24, 25-34, ≥35 cigarettes/day) | Age, calendar time, race, parity, body mass index at 18, alcohol drinking | 5             |
| Moen et al., 1997 <sup>66</sup>          | Norway  | Case-control                    | Women with self-reported endometriosis                                                            | Women aged without self-reported endometriosis                            | 79/3955                    | 40-42                                                     | Current smoker                                                         | -                                                                         | 2             |
| Niskar et al., 2009 <sup>67</sup>        | USA     | Case-control                    | Nulliparous women seeking reproductive assistance with endometriosis (laparoscopically confirmed) | Nulliparous women seeking reproductive assistance without endometriosis   | 60/64                      | 20-45                                                     | Ever smoker                                                            | -                                                                         | 4             |

| Study                                | Country | Study design | Cases                                                                                                                                                                      | Controls                                                                                                                                                                                             | Sample size cases/controls | Age (years) | Smoking habit                                                         | Confounding factors | Quality score |
|--------------------------------------|---------|--------------|----------------------------------------------------------------------------------------------------------------------------------------------------------------------------|------------------------------------------------------------------------------------------------------------------------------------------------------------------------------------------------------|----------------------------|-------------|-----------------------------------------------------------------------|---------------------|---------------|
| Parazzini et al., 2008 <sup>68</sup> | Italy   | Case-control | Women with deep endometriosis or pelvic and ovarian endometriosis (laparoscopically confirmed); separate groups of deep endometriosis and pelvic and ovarian endometriosis | Women without endometriosis admitted to hospital for acute non-gynecological, non-hormonal, non-neoplastic conditions, participating as controls in a case-control study on female genital neoplasms | 181 + 162/329              | 20-55       | Never, former, current                                                | -                   | 5             |
| Pauwels et al., 2001 <sup>69</sup>   | Belgium | Case-control | Infertile women with endometriosis (laparoscopically confirmed)                                                                                                            | Infertile women without endometriosis (laparoscopically confirmed)                                                                                                                                   | 42/27                      | 24-42       | Non smokers                                                           | -                   | 5             |
| Pollack et al., 2013 <sup>70</sup>   | USA     | Cohort       | Women with endometriosis (confirmed through laparoscopy or magnetic resonance imaging)                                                                                     | Women without endometriosis (confirmed through laparoscopy or magnetic resonance imaging)                                                                                                            | 204/396                    | 18-44       | Current smoker                                                        | -                   | 5             |
| Porpora et al., 2009 <sup>71</sup>   | Italy   | Case-control | Women with endometriosis (laparoscopically confirmed)                                                                                                                      | Women without endometriosis who underwent laparoscopy for benign gynecological conditions (unrelated to infertility)                                                                                 | 80/78                      | 18-45       | Never, former, current smokers (1-9, 10-19, $\geq 20$ cigarettes/day) | -                   | 4             |



| Study                                       | Country   | Study design | Cases                                                                                                                                                   | Controls                                                                                                                               | Sample size cases/controls | Age (years)               | Smoking habit                                              | Confounding factors        | Quality score |
|---------------------------------------------|-----------|--------------|---------------------------------------------------------------------------------------------------------------------------------------------------------|----------------------------------------------------------------------------------------------------------------------------------------|----------------------------|---------------------------|------------------------------------------------------------|----------------------------|---------------|
| Sangi-Haghpeykar et al., 1995 <sup>72</sup> | USA       | Case-control | Women undergoing laparoscopic tubal sterilization with endometriosis                                                                                    | Women undergoing laparoscopic tubal sterilization without endometriosis                                                                | 126/504                    | NA                        | Never, former, current smoker (< 1 pack/day, ≥ 1 pack/day) | Age, number of live births | 5             |
| Signorello et al., 1997 <sup>14</sup>       | USA       | Case-control | Women with infertility-associated endometriosis (laparoscopically confirmed)                                                                            | fertile and infertile women both without endometriosis (laparoscopically confirmed); separate groups of fertile and infertile controls | 50/89 + 47                 | 23-44                     | Never, ever smoker                                         | -                          | 4             |
| Treloar et al., 2010 <sup>73</sup>          | Australia | Case-control | Women with endometriosis (surgically confirmed) with no first degree relative with endometriosis                                                        | Same-sex female twin pairs enrolled with the Australian Twin Registry, without endometriosis (self-reported)                           | 268/244                    | 18-55                     | Never, former, current smoker                              | -                          | 3             |
| Tsai et al., 2013 <sup>74</sup>             | Taiwan    | Case-control | Women with endometriosis (laparoscopically confirmed)                                                                                                   | Women without endometriosis (confirmed through ultrasonography)                                                                        | 153/636                    | mean 40.3 ± 4.9 for cases | Ever smoker                                                | -                          | 3             |
| Tsuchiya et al., 2007 <sup>75</sup>         | Japan     | Case-control | Women who had not given birth or lactate, with endometriosis (laparoscopically confirmed); separate groups of stage I/II and stage III/IV endometriosis | Women who had not given birth or lactate without endometriosis (laparoscopically confirmed)                                            | 79/59                      | 20-45                     | Never, ever smoker                                         | -                          | 5             |

1  
2  
3  
4  
5  
6  
7  
8  
9  
10  
11  
12  
13  
14  
15  
16  
17  
18  
19  
20  
21  
22  
23  
24  
25  
26  
27  
28  
29  
30  
31  
32  
33  
34  
35  
36  
37  
38  
39  
40  
41  
42  
43  
44  
45  
46  
47  
48  
49

| Study                         | Country   | Study design | Cases                                                             | Controls                    | Sample size cases/controls | Age (years) | Smoking habit                                                         | Confounding factors | Quality score |
|-------------------------------|-----------|--------------|-------------------------------------------------------------------|-----------------------------|----------------------------|-------------|-----------------------------------------------------------------------|---------------------|---------------|
| Tu et al., 2014 <sup>76</sup> | Australia | Cohort       | Women with endometriosis (self-reported diagnosis by a clinician) | Women without endometriosis | 490/5607                   | 18-23       | Never, ever smoked (less than daily for 6 months, daily for 6 months) | -                   | 4             |

<sup>1</sup>Based on the Newcastle-Ottawa Score <sup>22</sup>. NA: not available; NHANES: National Health and Nutrition Examination Survey; OC: oral contraceptive

For peer review only

## Appendix

The PubMed search was performed using the following search terms: "tobacco"[MeSH Terms] OR tobacco[Text Word] OR "smoking"[MeSH Terms] OR smoking[Text Word] OR cigarette[All Fields] OR risk factor OR epidemiology AND endometriosis. The search was limited to papers on Humans, written in English.

For peer review only

## MOOSE Guidelines for Meta-Analyses and Systematic Reviews of Observational Studies\*

|    |                        |                                                                                                                                                                                                                                                                 |                |
|----|------------------------|-----------------------------------------------------------------------------------------------------------------------------------------------------------------------------------------------------------------------------------------------------------------|----------------|
| 1  |                        |                                                                                                                                                                                                                                                                 |                |
| 2  |                        |                                                                                                                                                                                                                                                                 |                |
| 3  |                        |                                                                                                                                                                                                                                                                 |                |
| 4  |                        |                                                                                                                                                                                                                                                                 |                |
| 5  |                        |                                                                                                                                                                                                                                                                 |                |
| 6  |                        |                                                                                                                                                                                                                                                                 |                |
| 7  |                        |                                                                                                                                                                                                                                                                 |                |
| 8  |                        |                                                                                                                                                                                                                                                                 |                |
| 9  |                        |                                                                                                                                                                                                                                                                 |                |
| 10 | <b>Title</b>           | Identify the study as a meta-analysis (or systematic review)                                                                                                                                                                                                    |                |
| 11 | <b>Abstract</b>        | Use the journal's structured format                                                                                                                                                                                                                             |                |
| 12 |                        |                                                                                                                                                                                                                                                                 |                |
| 13 | <b>Introduction</b>    | <b>Present</b>                                                                                                                                                                                                                                                  | OK             |
| 14 |                        | • The clinical problem                                                                                                                                                                                                                                          | OK             |
| 15 |                        | • The hypothesis                                                                                                                                                                                                                                                |                |
| 16 |                        | • A statement of objectives that includes the study population, the condition of interest, the exposure or intervention, and the outcome(s) considered                                                                                                          | OK             |
| 17 |                        |                                                                                                                                                                                                                                                                 |                |
| 18 |                        |                                                                                                                                                                                                                                                                 |                |
| 19 | <b>Sources</b>         | <b>Describe</b>                                                                                                                                                                                                                                                 | OK             |
| 20 |                        | • Qualifications of searchers (eg, librarians and investigators)                                                                                                                                                                                                |                |
| 21 |                        | • Search strategy, including time period included in the synthesis and keywords                                                                                                                                                                                 | OK             |
| 22 |                        | • Effort to include all available studies, including contact with authors                                                                                                                                                                                       | OK             |
| 23 |                        | • Databases and registries searched                                                                                                                                                                                                                             | OK             |
| 24 |                        | • Search software used, name and version, including special features used (eg, explosion)                                                                                                                                                                       | OK             |
| 25 |                        | • Use of hand searching (eg, reference lists of obtained articles)                                                                                                                                                                                              | OK             |
| 26 |                        | • List of citations located and those excluded, including justification                                                                                                                                                                                         | OK             |
| 27 |                        | • Method of addressing articles published in languages other than English                                                                                                                                                                                       | OK             |
| 28 |                        | • Method of handling abstracts and unpublished studies                                                                                                                                                                                                          | OK             |
| 29 |                        | • Description of any contact with authors                                                                                                                                                                                                                       | not applicable |
| 30 | <b>Study Selection</b> | <b>Describe</b>                                                                                                                                                                                                                                                 |                |
| 31 |                        | • Types of study designs considered                                                                                                                                                                                                                             | OK             |
| 32 |                        | • Relevance or appropriateness of studies gathered for assessing the hypothesis to be tested                                                                                                                                                                    | OK             |
| 33 |                        | • Rationale for the selection and coding of data (eg, sound clinical principles or convenience)                                                                                                                                                                 | OK             |
| 34 |                        | • Documentation of how data were classified and coded (eg, multiple raters, blinding, and interrater reliability)                                                                                                                                               | OK             |
| 35 |                        | • Assessment of confounding (eg, comparability of cases and controls in studies where appropriate)                                                                                                                                                              | OK             |
| 36 |                        | • Assessment of study quality, including blinding of quality assessors; stratification or regression on possible predictors of study results                                                                                                                    | OK             |
| 37 |                        | • Assessment of heterogeneity                                                                                                                                                                                                                                   | OK             |
| 38 |                        | • Statistical methods (eg, complete description of fixed or random effects models, justification of whether the chosen models account for predictors of study results, dose-response models, or cumulative meta-analysis) in sufficient detail to be replicated | OK             |
| 39 |                        |                                                                                                                                                                                                                                                                 |                |
| 40 |                        |                                                                                                                                                                                                                                                                 |                |
| 41 |                        |                                                                                                                                                                                                                                                                 |                |
| 42 | <b>Results</b>         | <b>Present</b>                                                                                                                                                                                                                                                  |                |
| 43 |                        | • A graph summarizing individual study estimates and the overall estimate                                                                                                                                                                                       | OK             |
| 44 |                        | • A table giving descriptive information for each included study                                                                                                                                                                                                | OK             |
| 45 |                        | • Results of sensitivity testing (eg, subgroup analysis)                                                                                                                                                                                                        | OK             |
| 46 |                        | • Indication of statistical uncertainty of findings                                                                                                                                                                                                             | OK             |
| 47 |                        |                                                                                                                                                                                                                                                                 |                |
| 48 | <b>Discussion</b>      | <b>Discuss</b>                                                                                                                                                                                                                                                  |                |
| 49 |                        | • Strengths and weaknesses                                                                                                                                                                                                                                      | OK             |
| 50 |                        | • Potential biases in the review process (eg, publication bias)                                                                                                                                                                                                 | OK             |
| 51 |                        | • Justification for exclusion (eg, exclusion of non-English-language citations)                                                                                                                                                                                 | not applicable |
| 52 |                        | • Assessment of quality of included studies                                                                                                                                                                                                                     | OK             |
| 53 |                        | • Consideration of alternative explanations for observed results                                                                                                                                                                                                | OK             |
| 54 |                        | • Generalization of the conclusions (ie, appropriate for the data presented and within the domain of the literature review)                                                                                                                                     | OK             |
| 55 |                        | • Guidelines for future research                                                                                                                                                                                                                                | OK             |
| 56 |                        | • Disclosure of funding source                                                                                                                                                                                                                                  | OK             |
| 57 |                        |                                                                                                                                                                                                                                                                 |                |
| 58 |                        |                                                                                                                                                                                                                                                                 |                |
| 59 |                        |                                                                                                                                                                                                                                                                 |                |
| 60 |                        |                                                                                                                                                                                                                                                                 |                |

\*Modified from Stroup DF, Berlin JA, Morton SC, Olkin I, Williamson GD, Rennie D, et al. Meta-analysis of observational studies in epidemiology: a proposal for reporting. Meta-analysis Of Observational Studies in Epidemiology (MOOSE) group. JAMA 2000;283:2008-12. Copyrighted © 2000, American Medical Association. All rights reserved.

*John A....*
