# Supplementary material for: Tobacco smoking and risk of endometriosis: a systematic review and meta-analysis
Source: PubMed Central journal article supplement — BMJ Open. 2014 Dec 22;4(12):e006325. doi: 10.1136/bmjopen-2014-006325 (PMC4275697; doi:10.1136/bmjopen-2014-006325), 2014-12-22
Supplement: bmjopen-2014-006325.reviewer_comments.pdf [file bmjopen-2014-006325.reviewer_comments.pdf]

## PEER REVIEW HISTORY

BMJ Open publishes all reviews undertaken for accepted manuscripts. Reviewers are asked to complete a checklist review form (<http://bmjopen.bmj.com/site/about/resources/checklist.pdf>) and are provided with free text boxes to elaborate on their assessment. These free text comments are reproduced below. Some articles will have been accepted based in part or entirely on reviews undertaken for other BMJ Group journals. These will be reproduced where possible.

### ARTICLE DETAILS

|                            |                                                                                                                                              |
|----------------------------|----------------------------------------------------------------------------------------------------------------------------------------------|
| <b>TITLE (PROVISIONAL)</b> | Tobacco smoking and risk of endometriosis: a systematic review and meta-analysis                                                             |
| <b>AUTHORS</b>             | Parazzini, Fabio; Bravi, Francesca; Cipriani, Sonia; Chiaffarino, Francesca; Ricci, Elena; Chiantera, Vito; Viganò, Paola; La Vecchia, Carlo |

### VERSION 1 - REVIEW

|                        |                                            |
|------------------------|--------------------------------------------|
| <b>REVIEWER</b>        | Paul Terry<br>University of Tennessee, USA |
| <b>REVIEW RETURNED</b> | 30-Oct-2014                                |

|                         |      |
|-------------------------|------|
| <b>GENERAL COMMENTS</b> | none |
|-------------------------|------|
